# Supplementary material
Source: HighWire-hosted journal article supplement (doi:10.1101/rna.065102.117)
Supplement: Supplemental_Table.xlsx [file Supplemental_Table.xlsx]

## Sheet: Data
Parameter_Set	Mean_RMSD	Mean_Norm_RMSD	Mean_Sensitivity	Mean_PPV					>	Mean_RMSD	1	Index	-3	+3	Average	Expt Num	Value	Error	ID	Chart X
0+3	0.00361849	0.0390699	97.9652	98.0663					>	Mean_Norm_RMSD		0	0.00630166	0.00361849	0.00496007	e1	-9.60439	0.437377	D1	149				e655	1
0-3	0.00630166	0.0664344	96.4232	96.4794					<	Mean_Sensitivity		1	0.0028809	0.00156441	0.00222266	e2	-9.11002	0.47455	D2	150				e656	2
1+3	0.00156441	0.0192894	99.1953	99.2768					<	Mean_PPV		2	0.00276446	0.00205692	0.00241069	e3	-9.78785	0.444046	D3	151				e657	3
1-3	0.0028809	0.034582	98.1851	98.3156								3	0.00425815	0.00264548	0.00345181	e4	-9.27374	0.459842	D4	152				e658	4
10+3	0.000881466	0.0100752	99.584	99.5941								4	0.000738262	0.000551653	0.000644957	e5	-6.0572	0.181363	D5	153				e659	5
10-3	0.00106458	0.0126899	99.46	99.4386								5	0.000226282	0.00018989	0.000208086	e6	-4.98257	0.14824	D6	154				e660	6
100+3	0.000403169	0.00493403	99.8373	99.8365								6	0.000400242	0.000279464	0.000339853	e7	-6.0572	0.181363	D7	155				e661	7
100-3	0.000421111	0.00467043	99.7959	99.7787								7	0.000290888	0.000244013	0.00026745	e8	-4.91208	0.159414	D8	156				e662	8
101+3	0.00041377	0.00503806	99.8261	99.8335								8	0.00252809	0.00186645	0.00219727	e9	-6.85005	0.258897	D9	157				e663	9
101-3	0.000430514	0.00476464	99.7948	99.7634								9	0.00238905	0.00179976	0.00209441	e10	-6.84366	0.250804	D10	158				e664	10
102+3	0.000424962	0.00514846	99.8173	99.8229								10	0.00106458	0.000881466	0.000973023	e11	-5.25305	0.171052	D11	159				e665	11
102-3	0.000440696	0.00486629	99.8003	99.7646								11	0.0010379	0.000624712	0.000831306	e12	-7.05005	0.278329	D12	160				e666	12
103+3	0.000436577	0.00526216	99.8154	99.8228								12	0.00153646	0.00165575	0.00159611	e13	-5.81245	0.207999	D13	161				e667	13
103-3	0.000451443	0.00497366	99.7969	99.7571								13	0.00153646	0.00165575	0.00159611	e14	-5.76377	0.209293	D14	162				e668	14
104+3	0.000564027	0.00648864	99.7475	99.7787								14	0.0038232	0.00336293	0.00359307	e15	-7.92336	0.352834	D15	163				e669	15
104-3	0.000545038	0.00590107	99.7438	99.7026								15	0.00494106	0.00348091	0.00421098	e16	-9.00945	0.474654	D16	164				e670	16
105+3	0.000371893	0.00416713	99.8208	99.7996								16	0.00193926	0.00173666	0.00183796	e17	-6.15568	0.26742	D17	165				e671	17
105-3	0.00033146	0.00379817	99.8492	99.8333								17	0.00252789	0.00220232	0.00236511	e18	-6.9632	0.343079	D18	166				e672	18
106+3	0.000407857	0.00494951	99.7588	99.7436								18	0.00161044	0.00140635	0.0015084	e19	-7.69704	0.3694	D19	167				e673	19
106-3	0.00043382	0.00559168	99.7844	99.7691								19	0.00161581	0.00125387	0.00143484	e20	-8.879	0.44829	D20	168				e674	20
107+3	0.000436577	0.00526216	99.8154	99.8228								20	0.000686909	0.000577057	0.000631983	e21	-8.1617	0.438362	D21	169				e675	21
107-3	0.000451443	0.00497366	99.7969	99.7571								21	0.000480327	0.000475934	0.000478131	e22	-6.93182	0.282894	D22	170				e676	22
108+3	0.000629455	0.00709093	99.6961	99.6829								22	0.000588359	0.000517693	0.000553026	e23	-7.9805	0.386981	D23	171				e677	23
108-3	0.000570482	0.00614138	99.779	99.736								23	0.00277071	0.00206159	0.00241615	e24	-8.72016	0.434855	D24	172				e678	24
109+3	0.00121009	0.0122496	99.5324	99.5776								24	0.00163752	0.00141591	0.00152672	e25	-4.09196	0.121603	D25	173				e679	25
109-3	0.00135346	0.0133048	99.5163	99.5244								25	0.000478444	0.00031142	0.000394932	e26	-5.38293	0.196039	D26	174				e680	26
11+3	0.000624712	0.00695226	99.7527	99.7321								26	0.00042394	0.000277397	0.000350669	e27	-5.23049	0.192351	D27	175				e681	27
11-3	0.0010379	0.0116077	99.5233	99.4978								27	0.000315146	0.000198924	0.000257035	e28	-5.43914	0.18722	D28	176				e682	28
110+3	0.00085319	0.0093211	99.6261	99.6745								28	0.000356449	0.000268997	0.000312723	e29	-5.1053	0.196326	D29	177				e683	29
110-3	0.000874685	0.00908384	99.5568	99.5084								29	0.000540988	0.000311735	0.000426361	e30	-5.60004	0.218722	D30	178				e684	30
111+3	0.000863375	0.00941967	99.622	99.673								30	0.00522827	0.00404097	0.00463462	e31	-5.2692	0.310483	D31	179				e685	31
111-3	0.000885088	0.00918737	99.5419	99.4894								31	0.000146128	0.00012667	0.000136399	e32	-4.89665	0.204317	D32	180				e686	32
112+3	0.000801688	0.0087473	99.6308	99.6135								32	0.0021314	0.00221574	0.00217357	e33	-4.8444	0.158158	D33	181				e687	33
112-3	0.000764717	0.00844937	99.7037	99.6776								33	0.00247173	0.0017838	0.00212777	e34	-5.81395	0.238174	D34	182				e688	34
113+3	0.000700635	0.00780211	99.6678	99.6439								34	0.00137254	0.0012754	0.00132397	e35	-5.788	0.337296	D35	183				e689	35
113-3	0.000672493	0.00709436	99.7276	99.6957								35	0.00098935	0.000905883	0.000947617	e36	-5.26563	0.242958	D36	184				e690	36
114+3	0.00125021	0.0145786	99.355	99.3496								36	9.11471e-05	0.000103627	9.7387e-05	e37	-4.55305	0.135697	D37	185				e691	37
114-3	0.00135154	0.0155763	99.2964	99.3157								37	0.00014607	0.000141056	0.000143563	e38	-5.17485	0.194038	D38	186				e692	38
115+3	0.00114674	0.0134542	99.4129	99.3984								38	0.000187231	0.000166033	0.000176632	e39	-5.08104	0.258146	D39	187				e693	39
115-3	0.00122775	0.014248	99.3517	99.3756								39	0	0	0	e40	-7.2226	0.356518	D40	188				e694	40
116+3	0.000629455	0.00709093	99.6961	99.6829								40	0	0	0	e41	-11.37	0.497312	D41	189				e695	41
116-3	0.000570482	0.00614138	99.779	99.736								41	0.00928699	0.0146438	0.0119654	e42	-14.6264	0.764318	D42	190				e696	42
117+3	0.00084549	0.00918097	99.6041	99.603								42	0.00459319	0.00559851	0.00509585	e43	-12.173	0.661642	D43	191				e697	43
117-3	0.000813069	0.00892469	99.6607	99.6366								43	0.00056354	0.000534575	0.000549057	e44	-8.72655	0.445623	D44	192				e698	44
118+3	0.000817136	0.00890284	99.6113	99.6086								44	0.00165305	0.00157174	0.00161239	e45	-8.43953	0.36443	D45	193				e699	45
118-3	0.000782379	0.00861819	99.6839	99.659								45	0.00139209	0.00127951	0.0013358	e46	0.640755	0.513577	H1	227				e700	46
119+3	0.000811861	0.00884972	99.6213	99.6127								46	0.00100255	0.000944377	0.000973464	e47	-0.92936	0.35996	H2	228				e701	47
119-3	0.000775709	0.00856017	99.6928	99.6562								47	0.000589155	0.000578749	0.000583952	e48	-0.964875	0.212701	H3	229				e702	48
12+3	0.00165575	0.01564	99.3903	99.394								48	0.00139542	0.00130685	0.00135114	e49	0.33306	0.327848	H4	230				e703	49
12-3	0.00153646	0.014767	99.3689	99.3858								49	0.00110494	0.00103446	0.0010697	e50	-0.213755	0.397657	H5	231				e704	50
120+3	0.000822534	0.00895734	99.6115	99.6068								50	0.000538238	0.000532903	0.000535571	e51	-6.29687	0.19078	H6	232				e705	51
120-3	0.000788261	0.00867693	99.6824	99.6499								51	4.13686e-05	6.12315e-05	5.13001e-05	e52	-4.6429	0.138011	H7	233				e706	52
121+3	0.000462725	0.00554373	99.7341	99.716								52	0.000589155	0.000578749	0.000583952	e53	-7.03334	0.208896	H8	234				e707	53
121-3	0.000492326	0.00622213	99.7627	99.7415								53	0.000876243	0.000807769	0.000842006	e54	0.576485	0.306244	H9	235				e708	54
122+3	0.00132335	0.0153697	99.2925	99.3013								54	0.00095177	0.000899117	0.000925443	e55	0.87329	0.33506	H10	236				e709	55
122-3	0.00144923	0.0166301	99.2209	99.2523								55	0.000835464	0.000833589	0.000834526	e56	-0.31619	0.276294	H11	237				e710	56
123+3	0.000883599	0.0105971	99.5615	99.5534								56	0.000858667	0.00085702	0.000857844	e57	-1.40793	0.288128	H12	238				e711	57
123-3	0.000922698	0.0109658	99.568	99.5363								57	0.000905724	0.000904445	0.000905084	e58	-0.061115	0.308189	H13	239				e712	58
124+3	0.0015003	0.0138399	99.4488	99.425								58	0.00057745	0.000558066	0.000567758	e59	-2.51864	0.181192	H14	240				e713	59
124-3	0.00143592	0.0129938	99.4494	99.428								59	0.00175314	0.00158849	0.00167081	e60	-1.81471	0.407856	H15	241				e714	60
125+3	0.00116546	0.011062	99.6152	99.5966								60	0.000745139	0.000742423	0.000743781	e61	-1.28104	0.235465	H16	242				e715	61
125-3	0.00106829	0.00959328	99.5914	99.5521								61	0.000677808	0.000694559	0.000686183	e62	-7.60082	0.226372	H17	243				e716	62
126+3	0.00179089	0.0165316	99.2459	99.2642								62	0.000346133	0.000344978	0.000345556	e63	-4.30061	0.129769	H18	244				e717	63
126-3	0.00175832	0.0160347	99.1554	99.1621								63	0.000599285	0.000572986	0.000586135	e64	-8.16135	0.244922	H19	245				e718	64
127+3	0.00127711	0.0119946	99.5692	99.534								64	0.000350553	0.000374723	0.000362638	e65	-1.78837	0.11255	H20	246				e719	65
127-3	0.00121742	0.0111581	99.5349	99.4994								65	0.000988846	0.00107383	0.00103134	e66	0.1699	0.335559	H21	247				e720	66
128+3	0.00154065	0.0143823	99.3595	99.3805								66	0.000697767	0.000711277	0.000704522	e67	-1.43518	0.277074	H22	248				e721	67
128-3	0.00150681	0.0138307	99.2759	99.3282								67	0.000417804	0.000437147	0.000427476	e68	-3.30643	0.149098	H23	249				e722	68
129+3	0.0010059	0.00944857	99.6563	99.6267								68	0.000417804	0.000437147	0.000427476	e69	-3.49684	0.150348	H24	250				e723	69
129-3	0.000979188	0.00884298	99.6094	99.609								69	0.000443089	0.000459182	0.000451136	e70	-3.22786	0.169271	H25	251				e724	70
13+3	0.00165575	0.01564	99.3903	99.394								70	0.000430325	0.0004481	0.000439212	e71	-3.15831	0.162947	H26	252				e725	71
13-3	0.00153646	0.014767	99.3689	99.3858								71	0.000393713	0.000416278	0.000404996	e72	-3.19139	0.13416	H27	253				e726	72
130+3	0.000412585	0.00464198	99.871	99.8507								72	0.000393713	0.000416278	0.000404996	e73	-3.34703	0.132983	H28	254				e727	73
130-3	0.00037997	0.00391327	99.8829	99.8924								73	0.000393713	0.000416278	0.000404996	e74	-3.22936	0.13255	H29	255				e728	74
131+3	0.00124658	0.0117864	99.5136	99.4905								74	0.000393713	0.000416278	0.000404996	e75	-3.52673	0.130007	H30	256				e729	75
131-3	0.00125676	0.0120043	99.5034	99.4848								75	0.000456092	0.00047078	0.000463436	e76	-4.19761	0.180536	H31	257				e730	76
132+3	0.00141081	0.0131	99.4967	99.4572								76	0.000598135	0.000602604	0.000600369	e77	-4.04629	0.198684	H32	258				e731	77
132-3	0.00134797	0.0122526	99.4869	99.4577								77	0.000554747	0.000534291	0.000544519	e78	-4.43238	0.171846	H33	259				e732	78
133+3	0.00257288	0.0226555	99.0536	99.0256								78	0.00117582	0.00115348	0.00116465	e79	-0.278785	0.293518	H34	260				e733	79
133-3	0.00251496	0.0225527	98.9268	98.9645								79	0.00121632	0.00114765	0.00118198	e80	0.41576	0.423613	H35	261				e734	80
134+3	0.0022796	0.0207287	99.038	98.9902								80	0.000416006	0.000375534	0.00039577	e81	-2.38481	0.13226	H36	262				e735	81
134-3	0.00218434	0.019703	99.0442	99.0124								81	0.000484357	0.000446131	0.000465244	e82	-2.66301	0.157986	H37	263				e736	82
135+3	0.00112221	0.0122181	99.5176	99.4756								82	0.000650299	0.000610208	0.000630254	e83	-1.38481	0.231643	H38	264				e737	83
135-3	0.0011775	0.0132025	99.3787	99.3753								83	0.000650299	0.000610208	0.000630254	e84	-1.69665	0.234034	H39	265				e738	84
136+3	0.00150287	0.0156374	99.2991	99.2439								84	0.00186149	0.00172501	0.00179325	e85	-0.70117	0.455759	H40	266				e739	85
136-3	0.00149668	0.0160813	99.3062	99.3298								85	0.000650299	0.000610208	0.000630254	e86	-7.71849	0.23011	H41	267				e740	86
137+3	0.000599942	0.00676271	99.7406	99.7222								86	0.000358787	0.000328409	0.000343598	e87	-4.10267	0.122437	H42	268				e741	87
137-3	0.000637209	0.00750824	99.696	99.67								87	0.00100069	0.00102793	0.00101431	e88	-8.13034	0.243456	H43	269				e742	88
138+3	0.000774555	0.00858918	99.6792	99.623								88	0.000997163	0.000948257	0.00097271	e89	-0.2489	0.325188	H44	270				e743	89
138-3	0.000814604	0.00938211	99.5718	99.582								89	0.000997163	0.000948257	0.00097271	e90	-0.57146	0.333962	H45	271				e744	90
139+3	0.000724611	0.00806695	99.688	99.646								90	0.000576809	0.000635006	0.000605907	e91	-1.60324	0.319996	H46	272				e745	91
139-3	0.00076352	0.0088436	99.626	99.6026								91	0.000712609	0.000695414	0.000704012	e92	-2.37824	0.298438	H47	273				e746	92
14+3	0.00336293	0.037946	97.9505	97.9683								92	0.000652639	0.000637693	0.000645166	e93	-2.21395	0.262875	H48	274				e747	93
14-3	0.0038232	0.0419486	97.6122	97.8355								93	0.000570482	0.000629455	0.000599968	e94	-1.95249	0.305307	H49	275				e748	94
140+3	0.00117288	0.0126256	99.5483	99.5085								94	0.000799784	0.000817137	0.00080846	e95	-1.77711	0.336269	H50	276				e749	95
140-3	0.00123616	0.0131011	99.4396	99.5096								95	0.000806699	0.000839704	0.000823202	e96	-0.69365	0.441328	H51	277				e750	96
141+3	0.00107338	0.0117054	99.5479	99.4874								96	0.00104614	0.00110355	0.00107485	e97	0.34658	0.50544	H52	278				e751	97
141-3	0.00112504	0.0126505	99.3996	99.4082								97	0.000885088	0.000863375	0.000874232	e98	-0.72823	0.355195	H53	279				e752	98
142+3	0.00104896	0.0114487	99.5612	99.4974								98	0.00067774	0.000706142	0.000691941	e99	-1.71884	0.351217	H54	280				e753	99
142-3	0.00109873	0.0123711	99.4194	99.4123								99	0.00046267	0.000462464	0.000462567	e100	-2.75774	0.18505	H55	281				e754	100
143+3	0.00124007	0.0134071	99.4451	99.3996								100	0.000421111	0.000403169	0.00041214	e101	-2.55549	0.153962	H56	282				e755	101
143-3	0.00131716	0.014568	99.2891	99.3114								101	0.000430514	0.00041377	0.000422142	e102	-3.10643	0.163882	H57	283				e756	102
144+3	0.00158203	0.0160549	99.2759	99.3064								102	0.000440696	0.000424962	0.000432829	e103	-2.1474	0.165037	H58	284				e757	103
144-3	0.00176033	0.0184239	99.2087	99.1873								103	0.000451443	0.000436577	0.00044401	e104	-2.38011	0.180705	H59	285				e758	104
145+3	0.000979238	0.0101363	99.5871	99.5638								104	0.000545038	0.000564027	0.000554533	e105	-1.82447	0.226017	H60	286				e759	105
145-3	0.00111662	0.0121027	99.5234	99.5184								105	0.00033146	0.000371893	0.000351676	e106	-3.46583	0.152704	H61	287				e760	106
146+3	0.00168803	0.017092	99.2376	99.2645								106	0.00043382	0.000407857	0.000420839	e107	-3.85136	0.125334	H62	288				e761	107
146-3	0.00188517	0.0196125	99.1559	99.1462								107	0.000451443	0.000436577	0.00044401	e108	-2.89252	0.179356	H63	289				e762	108
147+3	0.00114565	0.0117543	99.5191	99.4741								108	0.000570482	0.000629455	0.000599968	e109	-6.22992	0.305828	H64	290				e763	109
147-3	0.00128277	0.0137412	99.4479	99.4294								109	0.00135346	0.00121009	0.00128177	e110	-1.4241	0.344176	H65	291				e764	110
148+3	0.00117981	0.0120995	99.5079	99.4697								110	0.000874685	0.00085319	0.000863938	e111	-0.34364	0.354424	H66	292				e765	111
148-3	0.00132969	0.0141985	99.4296	99.3998								111	0.000885088	0.000863375	0.000874232	e112	-0.472025	0.35924	H67	293				e766	112
149+3	0.000809833	0.00847284	99.683	99.6497								112	0.000764717	0.000801688	0.000783203	e113	-1.5429	0.368887	H68	294				e767	113
149-3	0.000863337	0.0094222	99.6338	99.6462								113	0.000672493	0.000700635	0.000686564	e114	-1.84666	0.342784	H69	295				e768	114
15+3	0.00348091	0.0388502	97.914	97.9224								114	0.00135154	0.00125021	0.00130087	e115	-1.03538	0.410879	H70	296				e769	115
15-3	0.00494106	0.0536553	96.9587	97.1712								115	0.00122775	0.00114674	0.00118724	e116	-1.29365	0.373071	H71	297				e770	116
150+3	0.000231055	0.00258183	99.9385	99.9268								116	0.000570482	0.000629455	0.000599968	e117	-1.0833	0.312521	H72	298				e771	117
150-3	0.000260212	0.00327435	99.9319	99.8983								117	0.000813069	0.00084549	0.000829279	e118	0.937755	0.452925	H73	299				e772	118
151+3	0.00152377	0.015847	99.3136	99.2499								118	0.000782379	0.000817136	0.000799758	e119	-1.29478	0.400555	H74	300				e773	119
151-3	0.00154579	0.0161517	99.3269	99.3024								119	0.000775709	0.000811861	0.000793785	e120	-0.833685	0.392336	H75	301				e774	120
152+3	9.39799e-06	0.000107614	99.9978	99.9993								120	0.000788261	0.000822534	0.000805397	e121	-0.526165	0.412294	H76	302				e775	121
152-3	1.36425e-05	0.000158103	99.9965	99.9953								121	0.000492326	0.000462725	0.000477525	e122	-2.54477	0.147024	H77	303				e776	122
153+3	1.96296e-05	0.000254595	99.9984	99.9941								122	0.00144923	0.00132335	0.00138629	e123	-1.1649	0.443386	H78	304				e777	123
153-3	4.89039e-05	0.000625612	99.99	99.9841								123	0.000922698	0.000883599	0.000903149	e124	-0.80454	0.273032	H80	305				e778	124
154+3	8.54617e-05	0.00156848	99.9823	99.9719								124	0.00143592	0.0015003	0.00146811	e125	-2.41302	0.301727	H81	306				e779	125
154-3	0.000104829	0.00214461	99.978	99.9824								125	0.00106829	0.00116546	0.00111688	e126	-2.11226	0.233311	H82	307				e780	126
155+3	0.000140692	0.00230179	99.9449	99.928								126	0.00175832	0.00179089	0.00177461	e127	-1.03125	0.479125	H83	308				e781	127
155-3	0.000149253	0.00241513	99.8993	99.9017								127	0.00121742	0.00127711	0.00124727	e128	-2.11658	0.253658	H84	309				e782	128
156+3	0.000137459	0.00251068	99.963	99.9362								128	0.00150681	0.00154065	0.00152373	e129	-0.22447	0.405506	H85	310				e783	129
156-3	0.000109283	0.00183939	99.9607	99.9628								129	0.000979188	0.0010059	0.000992544	e130	-7.19274	0.213633	H86	311				e784	130
157+3	2.81106e-08	7.26248e-07	100	100								130	0.00037997	0.000412585	0.000396277	e131	-2.91149	0.0910333	H87	312				e785	131
157-3	6.81876e-08	1.76205e-06	100	100								131	0.00125676	0.00124658	0.00125167	e132	-7.38165	0.224014	H88	313				e786	132
158+3	1.27285e-09	2.34137e-08	100	100								132	0.00134797	0.00141081	0.00137939	e133	-0.406605	0.284538	H89	314				e787	133
158-3	2.21265e-09	4.0701e-08	100	100								133	0.00251496	0.00257288	0.00254392	e134	0.559925	0.5414	H90	315				e788	134
159+3	0	0	100	100								134	0.00218434	0.0022796	0.00223197	e135	-0.65718	0.396767	H91	316				e789	135
159-3	0	0	100	100								135	0.0011775	0.00112221	0.00114985	e136	-0.65455	0.41714	H92	317				e790	136
16+3	0.00173666	0.0172146	99.1575	99.1526								136	0.00149668	0.00150287	0.00149978	e137	-1.28181	0.337777	H93	318				e791	137
16-3	0.00193926	0.0196379	99.029	99.0415								137	0.000637209	0.000599942	0.000618576	e138	-2.19459	0.214751	H94	319				e792	138
160+3	2.24635e-09	4.13211e-08	100	100								138	0.000814604	0.000774555	0.00079458	e139	-2.15944	0.284448	H95	320				e793	139
160-3	5.28201e-09	9.71612e-08	100	100								139	0.00076352	0.000724611	0.000744065	e140	-2.34873	0.255724	H96	321				e794	140
161+3	7.96665e-10	9.71642e-09	100	100								140	0.00123616	0.00117288	0.00120452	e141	-1.64703	0.290138	H97	322				e795	141
161-3	1.61441e-09	1.97771e-08	100	100								141	0.00112504	0.00107338	0.00109921	e142	-0.082175	0.399516	H98	323				e796	142
162+3	4.48381e-05	0.00097622	99.9935	99.9966								142	0.00109873	0.00104896	0.00107384	e143	0.507305	0.387961	H99	324				e797	143
162-3	4.81635e-05	0.00103347	100	99.9993								143	0.00131716	0.00124007	0.00127861	e144	0.02628	0.458527	H100	325				e798	144
163+3	0.000156425	0.0027406	99.9565	99.9263								144	0.00176033	0.00158203	0.00167118	e145	-2.22862	0.365076	H101	326				e799	145
163-3	0.000128862	0.00208847	99.9504	99.9577								145	0.00111662	0.000979238	0.00104793	e146	-1.07615	0.22309	H102	327				e800	146
164+3	4.1957e-05	0.000939756	99.9943	99.9994								146	0.00188517	0.00168803	0.0017866	e147	0.25373	0.403707	H103	328				e801	147
164-3	4.23732e-05	0.000942999	100	99.9999								147	0.00128277	0.00114565	0.00121421	e148	-2.1412	0.262658	H104	329				e802	148
165+3	0.000104511	0.00182383	99.9768	99.961								148	0.00132969	0.00117981	0.00125475	e149	-2.08613	0.270821	H105	330				e1	149
165-3	0.000126396	0.00242726	99.9636	99.9725								149	0.000863337	0.000809833	0.000836585	e150	-5.55025	0.183442	H106	331				e2	150
166+3	3.02527e-05	0.000322966	99.9902	99.9923								150	0.000260212	0.000231055	0.000245633	e151	-2.10228	0.0905662	H107	332				e3	151
166-3	3.23327e-05	0.000445332	99.9839	99.9822								151	0.00154579	0.00152377	0.00153478	e152	-8.0482	0.251611	H108	333				e4	152
167+3	4.33511e-05	0.00049958	99.964	99.9655								152	1.36425e-05	9.39799e-06	1.15202e-05	e153	-1.32145	0.12537	H126	334				e5	153
167-3	7.11151e-05	0.000821027	99.9366	99.9312								153	4.89039e-05	1.96296e-05	3.42667e-05	e154	-0.91545	0.358679	H127	335				e6	154
168+3	2.72266e-06	3.41073e-05	99.9996	99.999								154	0.000104829	8.54617e-05	9.51453e-05	e155	-3.21545	0.131387	H132	336				e7	155
168-3	6.09869e-06	7.498e-05	99.9978	99.999								155	0.000149253	0.000140692	0.000144973	e156	-3.95099	0.164466	H133	337				e8	156
169+3	2.82024e-06	6.39062e-05	99.9983	99.9981								156	0.000109283	0.000137459	0.000123371	e157	-4.09159	0.145354	H134	338				e9	157
169-3	3.35008e-06	6.89162e-05	99.9983	99.9948								157	6.81876e-08	2.81106e-08	4.81491e-08	e158	-5.5166	0.194585	H135	339				e10	158
17+3	0.00220232	0.0216714	98.8938	98.9395								158	2.21265e-09	1.27285e-09	1.74275e-09	e159	-5.4369	0.192431	H136	340				e11	159
17-3	0.00252789	0.0252945	98.7346	98.7249								159	0	0	0	e160	-4.4354	0.299477	H137	341				e12	160
170+3	1.33008e-05	0.000181773	99.9799	99.9825								160	5.28201e-09	2.24635e-09	3.76418e-09	e161	-1.02354	0.375497	H138	342				e13	161
170-3	1.63445e-05	0.000221598	99.9921	99.9954								161	1.61441e-09	7.96665e-10	1.20554e-09	e162	-1.58556	0.311542	H139	343				e14	162
171+3	1.5636e-06	2.1818e-05	99.9989	99.9987								162	4.81635e-05	4.48381e-05	4.65008e-05	e163	-3.79291	0.257628	H141	344				e15	163
171-3	3.56395e-06	4.54641e-05	99.9975	99.9987								163	0.000128862	0.000156425	0.000142643	e164	-6.30701	0.189989	H148	345				e16	164
172+3	6.10123e-05	0.00125971	99.9806	99.9811								164	4.23732e-05	4.1957e-05	4.21651e-05	e165	-4.3008	0.170121	H149	346				e17	165
172-3	7.14231e-05	0.00140411	99.9911	99.992								165	0.000126396	0.000104511	0.000115454	e166	-5.68182	0.186151	H150	347				e18	166
173+3	4.83667e-05	0.000637453	99.9695	99.9617								166	3.23327e-05	3.02527e-05	3.12927e-05	e167	-4.01847	0.19619	H152	348				e19	167
173-3	5.10981e-05	0.000662132	99.9786	99.9848								167	7.11151e-05	4.33511e-05	5.72331e-05	e168	-3.82805	0.195623	H153	349				e20	168
174+3	2.80753e-05	0.000293354	99.9916	99.9943								168	6.09869e-06	2.72266e-06	4.41067e-06	e169	-3.66809	0.181188	H154	350				e21	169
174-3	3.82448e-05	0.00033778	99.9405	99.9423								169	3.35008e-06	2.82024e-06	3.08516e-06	e170	-3.63857	0.147811	H155	351				e22	170
175+3	2.98228e-05	0.00040125	99.9872	99.9892								170	1.63445e-05	1.33008e-05	1.48226e-05	e171	-3.56264	0.151024	H156	352				e23	171
175-3	3.31987e-05	0.000458968	99.9928	99.9897								171	3.56395e-06	1.5636e-06	2.56377e-06	e172	-3.66866	0.192411	H158	353				e24	172
176+3	0.000137705	0.00219356	99.9178	99.9219								172	7.14231e-05	6.10123e-05	6.62177e-05	e173	-4.76509	0.181054	H159	354				e25	173
176-3	0.00013012	0.00210352	99.9491	99.9417								173	5.10981e-05	4.83667e-05	4.97324e-05	e174	-3.61358	0.198835	H160	355				e26	174
177+3	0.000126966	0.00205802	99.9241	99.9339								174	3.82448e-05	2.80753e-05	3.316e-05	e175	-3.60606	0.186717	H161	356				e27	175
177-3	0.000120987	0.00198813	99.9551	99.9465								175	3.31987e-05	2.98228e-05	3.15107e-05	e176	-3.76433	0.168401	H163	357				e28	176
178+3	1.8883e-05	0.000276711	99.9914	99.9908								176	0.00013012	0.000137705	0.000133913	e177	-4.88333	0.190542	H164	358				e29	177
178-3	2.62655e-05	0.000380106	99.9794	99.9836								177	0.000120987	0.000126966	0.000123976	e178	-4.45325	0.173532	H165	359				e30	178
179+3	0.000126966	0.00205802	99.9241	99.9339								178	2.62655e-05	1.8883e-05	2.25743e-05	e179	-4.41847	0.170725	H166	360				e31	179
179-3	0.000120987	0.00198813	99.9551	99.9465								179	0.000120987	0.000126966	0.000123976	e180	-4.77787	0.16622	H167	361				e32	180
18+3	0.00140635	0.0153196	99.3487	99.3028								180	7.56256e-06	7.8143e-06	7.68843e-06	e181	-1.7677	0.194031	H170	362				e33	181
18-3	0.00161044	0.0174075	99.2145	99.2266								181	0.0038938	0.00319592	0.00354486	e182	-9.676	0.460246	T1	194				e34	182
180+3	7.8143e-06	0.000107601	99.994	99.9883								182	0.00479598	0.00318613	0.00399106	e183	-9.41547	0.468665	T2	195				e35	183
180-3	7.56256e-06	0.000110201	99.9962	99.9961								183	0.00324985	0.00244636	0.00284811	e184	-9.77487	0.493234	T3	196				e36	184
181+3	0.00319592	0.0327475	98.2628	98.3336								184	0.0060529	0.00782975	0.00694132	e185	-7.63614	0.340801	T4	197				e37	185
181-3	0.0038938	0.0412896	97.8066	97.7841								185	0.00632926	0.00412276	0.00522601	e186	-8.30024	0.441708	T5	198				e38	186
182+3	0.00318613	0.02801	98.9295	98.8989								186	0.00480369	0.00421999	0.00451184	e187	-7.52147	0.412907	T6	199				e39	187
182-3	0.00479598	0.0454908	97.9927	98.0173								187	0.00158024	0.00115931	0.00136977	e188	-6.89741	0.341144	T7	200				e40	188
183+3	0.00244636	0.0275807	98.7317	98.7144								188	0.00243374	0.00205767	0.00224571	e189	-7.70512	0.347811	T8	201				e41	189
183-3	0.00324985	0.0358025	97.9365	98.1138								189	0.00320502	0.00230526	0.00275514	e190	-8.08952	0.425443	T9	202				e42	190
184+3	0.00782975	0.0833356	95.1006	95.4795								190	0.00299333	0.00278186	0.0028876	e191	-7.00832	0.279897	T10	203				e43	191
184-3	0.0060529	0.0614778	96.5914	96.8059								191	0.00393577	0.00219564	0.00306571	e192	-6.73069	0.281634	T11	204				e44	192
185+3	0.00412276	0.0416212	97.8244	97.8459								192	0.00238288	0.00194817	0.00216552	e193	-7.02749	0.30813	T12	205				e45	193
185-3	0.00632926	0.0631064	97.0194	97.2185								193	0.00234372	0.00191617	0.00212995	e194	-6.7228	0.242255	T13	206				e182	194
186+3	0.00421999	0.0417273	97.8132	97.8627								194	0.00356732	0.00301814	0.00329273	e195	-7.70832	0.352863	T14	207				e183	195
186-3	0.00480369	0.0474312	97.4411	97.5735								195	0.00187616	0.00159209	0.00173412	e196	-7.48313	0.348294	T15	208				e184	196
187+3	0.00115931	0.0127203	99.5115	99.4969								196	0.00216863	0.00227477	0.0022217	e197	-7.93953	0.313382	T16	209				e185	197
187-3	0.00158024	0.0171641	99.0813	99.1317								197	0.00220007	0.00187694	0.0020385	e198	-9.72449	0.530139	T17	210				e186	198
188+3	0.00205767	0.0224771	98.8795	98.9146								198	0.00224102	0.0014342	0.00183761	e199	-9.6976	0.584744	T18	211				e187	199
188-3	0.00243374	0.026353	98.7408	98.7656								199	0.00171973	0.00151729	0.00161851	e200	-6.61321	0.22309	T19	212				e188	200
189+3	0.00230526	0.0255554	98.7293	98.6691								200	0.0014705	0.0011649	0.0013177	e201	-6.25081	0.1861	T20	213				e189	201
189-3	0.00320502	0.0353158	98.3839	98.4374								201	0.000956427	0.000731753	0.00084409	e202	-6.92958	0.20588	T21	214				e190	202
19+3	0.00125387	0.0136874	99.448	99.4118								202	0.00185223	0.00157696	0.0017146	e203	-6.16565	0.186637	T22	215				e191	203
19-3	0.00161581	0.017181	99.2658	99.3104								203	0.000602004	0.000484457	0.00054323	e204	-5.90475	0.176876	T23	216				e192	204
190+3	0.00278186	0.0293333	98.6302	98.6684								204	0.000475351	0.000377412	0.000426381	e205	-5.65587	0.174592	T24	217				e193	205
190-3	0.00299333	0.0314569	98.4277	98.4432								205	0.00166784	0.00132583	0.00149684	e206	-6.95757	0.259703	T25	218				e194	206
191+3	0.00219564	0.0234563	98.8065	98.7891								206	0.000762001	0.000601031	0.000681516	e207	-7.02262	0.208693	T26	219				e195	207
191-3	0.00393577	0.0428013	97.6807	97.9008								207	0.000714065	0.000586296	0.00065018	e208	-5.91038	0.198862	T27	220				e196	208
192+3	0.00194817	0.0205515	98.9361	99.0541								208	0.00104111	0.000890758	0.000965934	e209	-5.75192	0.231259	T28	221				e197	209
192-3	0.00238288	0.0258515	98.8253	98.7792								209	0.00095856	0.000934625	0.000946592	e210	-3.96733	0.118019	T29	222				e198	210
193+3	0.00191617	0.020065	99.0795	99.2096								210	0.00332024	0.002912	0.00311612	e211	-9.379	0.504524	T30	223				e199	211
193-3	0.00234372	0.0242556	98.9667	98.9145								211	0.00191843	0.00154585	0.00173214	e212	-10.7937	0.57631	T31	224				e200	212
194+3	0.00301814	0.0323956	98.5511	98.4916								212	0.00139359	0.00101671	0.00120515	e213	-9.97337	0.477076	T32	225				e201	213
194-3	0.00356732	0.0387712	98.0207	98.1906								213	0.00601454	0.00642096	0.00621775	e214	-7.47298	0.343528	T33	226				e202	214
195+3	0.00159209	0.0182229	99.2071	99.1132								214	0.000851513	0.000706663	0.000779088	e215	-5.63484	0.203411	I1	363				e203	215
195-3	0.00187616	0.0213124	98.9067	98.9561								215	0.0008565	0.000710196	0.000783348	e216	-5.3166	0.203406	I2	364				e204	216
196+3	0.00227477	0.0229873	98.9351	99.0337								216	0.000547387	0.000495009	0.000521198	e217	-5.21604	0.199712	I3	365				e205	217
196-3	0.00216863	0.0222068	99.084	99.0533								217	0.000406766	0.000383284	0.000395025	e218	-5.24499	0.220575	I4	366				e206	218
197+3	0.00187694	0.0196725	99.111	99.0718								218	0.000614839	0.000519803	0.000567321	e219	-4.95362	0.148678	I5	367				e207	219
197-3	0.00220007	0.0230883	98.8763	98.866								219	0.000520886	0.000516374	0.00051863	e220	-4.85194	0.249188	I6	368				e208	220
198+3	0.0014342	0.0154995	99.4314	99.4515								220	0.000344857	0.000323994	0.000334426	e221	-4.74929	0.142358	I7	369				e209	221
198-3	0.00224102	0.0235289	99.0931	99.126								221	0.000518459	0.000469261	0.00049386	e222	-4.74911	0.202917	I8	370				e210	222
199+3	0.00151729	0.0159944	99.1112	99.1855								222	0.000490778	0.000373644	0.000432211	e223	-8.23071	0.271558	I9	371				e211	223
199-3	0.00171973	0.0181629	99.1789	99.1779								223	0.000402447	0.000339816	0.000371131	e224	-7.90251	0.234933	I10	372				e212	224
2+3	0.00205692	0.0226608	98.9081	98.9796								224	0.000430103	0.000403001	0.000416552	e225	-7.78522	0.245579	I11	373				e213	225
2-3	0.00276446	0.030173	98.3882	98.4368								225	0.000600594	0.000485612	0.000543103	e226	-8.14725	0.272714	I12	374				e214	226
20+3	0.000577057	0.00702872	99.7462	99.7151								226	0.000453714	0.000444738	0.000449226	e227	-6.30758	0.192793	I13	375				e46	227
20-3	0.000686909	0.00786524	99.6321	99.6367								227	0.00037733	0.000317084	0.000347207	e228	-5.99424	0.200845	I14	376				e47	228
200+3	0.0011649	0.0125501	99.4638	99.4203								228	0.000457949	0.000326966	0.000392457	e229	-3.80456	0.210593	I15	377				e48	229
200-3	0.0014705	0.0159445	99.2948	99.3119								229	0.000197794	0.000258364	0.000228079	e230	-4.97957	0.181222	I16	378				e49	230
201+3	0.000731753	0.00855499	99.5831	99.5815								230	0.000249415	0.00032457	0.000286992	e231	-4.55494	0.196227	I17	379				e50	231
201-3	0.000956427	0.0114207	99.4308	99.4561								231	0.000641583	0.000596334	0.000618959	e232	-4.46792	0.254226	I18	380				e51	232
202+3	0.00157696	0.0159897	99.3299	99.2984								232	0.000386365	0.000372153	0.000379259	e233	-6.08447	0.183233	I19	381				e52	233
202-3	0.00185223	0.0183404	99.0964	99.0735								233	0.000501599	0.00045947	0.000480535	e234	-6.66641	0.198204	I20	382				e53	234
203+3	0.000484457	0.00590077	99.8467	99.8439								234	0.000444214	0.000432374	0.000438294	e235	-7.83071	0.243392	I21	383				e54	235
203-3	0.000602004	0.00761779	99.761	99.7721								235	0.00107428	0.000937948	0.00100611	e236	-6.86829	0.246191	I22	384				e55	236
204+3	0.000377412	0.00475751	99.8244	99.8167								236	0.0008483	0.000769888	0.000809094	e237	-6.0745	0.2098	I23	385				e56	237
204-3	0.000475351	0.00581215	99.8326	99.841								237	0.0008483	0.000769888	0.000809094	e238	-6.65853	0.209878	I24	386				e57	238
205+3	0.00132583	0.016107	99.2537	99.2285								238	0.00139653	0.00116025	0.00127839	e239	-9.27902	0.315945	I25	387				e58	239
205-3	0.00166784	0.0201569	99.0757	99.1068								239	0.00130157	0.00110375	0.00120266	e240	-8.14311	0.248564	I26	388				e59	240
206+3	0.000601031	0.00738935	99.6784	99.6356								240	0.000510164	0.000512065	0.000511114	e241	-7.93926	0.235999	I27	389				e60	241
206-3	0.000762001	0.00966631	99.5263	99.5284								241	0.000411009	0.000464656	0.000437832	e242	-5.82582	0.214014	I28	390				e61	242
207+3	0.000586296	0.00729143	99.7263	99.6956								242	0.000747898	0.000493369	0.000620633	e243	-6.26474	0.326819	I29	391				e62	243
207-3	0.000714065	0.00832927	99.6624	99.6954								243	0.000393768	0.00041174	0.000402754	e244	-5.27431	0.191787	I30	392				e63	244
208+3	0.000890758	0.0097417	99.6354	99.6191								244	0.00052809	0.000519191	0.000523641	e245	-4.96924	0.312784	I31	393				e64	245
208-3	0.00104111	0.0107624	99.5118	99.4979								245	0.000508331	0.000549037	0.000528684	e246	-4.67337	0.279185	I32	394				e65	246
209+3	0.000934625	0.0100055	99.5512	99.4995								246	0.00039908	0.00032394	0.00036151	e247	-4.68804	0.373655	I33	395				e66	247
209-3	0.00095856	0.00983662	99.5194	99.5412								247	0.000531483	0.000571167	0.000551325	e248	-4.3557	0.298171	I34	396				e67	248
21+3	0.000475934	0.00600711	99.7691	99.7604								248	0.00057357	0.000547162	0.000560366	e249	-6.1121	0.255123	I35	397				e68	249
21-3	0.000480327	0.00605723	99.7711	99.7666								249	0.000556254	0.000601235	0.000578744	e250	-6.08898	0.21823	I36	398				e69	250
210+3	0.002912	0.0287375	98.6186	98.7303								250	0.00126897	0.00120971	0.00123934	e251	-6.24162	0.281293	I37	399				e70	251
210-3	0.00332024	0.0324835	98.3716	98.3483								251	0.00055398	0.000563693	0.000558837	e252	-5.55646	0.285017	I38	400				e71	252
211+3	0.00154585	0.0174907	99.0971	99.1307								252	0.000546009	0.000581388	0.000563699	e253	-5.9965	0.231698	I39	401				e72	253
211-3	0.00191843	0.020843	99.0871	99.0257								253	0.000622648	0.000636879	0.000629763	e254	-5.15214	0.299844	I40	402				e73	254
212+3	0.00101671	0.0123206	99.4827	99.4463								254	0.000500361	0.0004873	0.00049383	e255	-6.55513	0.194693	I41	403				e74	255
212-3	0.00139359	0.0167548	99.141	99.1213								255	0.000483596	0.000395907	0.000439752	e256	-5.20571	0.334906	I42	404				e75	256
213+3	0.00642096	0.0646336	96.2688	96.6594								256	0.0005093	0.00055209	0.000530695	e257	-5.395	0.310519	I43	405				e76	257
213-3	0.00601454	0.0604234	96.6892	96.7975								257	0.000512828	0.000547101	0.000529965	e258	-5.82658	0.287194	I44	406				e77	258
214+3	0.000706663	0.00870716	99.6345	99.5999								258	0.000395581	0.000420131	0.000407856	e259	-5.73727	0.170501	I45	407				e78	259
214-3	0.000851513	0.0104662	99.5	99.4528								259	0.00033955	0.000338723	0.000339136	e260	-6.79588	0.212189	I46	408				e79	260
215+3	0.000710196	0.00913883	99.6604	99.6013								260	0.000337975	0.000318993	0.000328484	e261	-6.42687	0.196831	I47	409				e80	261
215-3	0.0008565	0.0108756	99.3689	99.3722								261	0.000407688	0.000350913	0.000379301	e262	-6.59812	0.196164	I48	410				e81	262
216+3	0.000495009	0.0062173	99.6729	99.687								262	0.000627084	0.000602127	0.000614606	e263	-8.31699	0.263804	I49	411				e82	263
216-3	0.000547387	0.00690901	99.6832	99.6421								263	0.000627453	0.000591646	0.000609549	e264	-6.4356	0.228856	I50	412				e83	264
217+3	0.000383284	0.00488352	99.7968	99.7747								264	0.000361248	0.000337822	0.000349535	e265	-7.42216	0.222255	I51	413				e84	265
217-3	0.000406766	0.00520516	99.8066	99.7743								265	0.000649474	0.00060595	0.000627712	e266	-8.01036	0.269413	I52	414				e85	266
218+3	0.000519803	0.00620152	99.6955	99.7311								266	0.00054021	0.000510269	0.000525239	e267	-6.97623	0.207482	I53	415				e86	267
218-3	0.000614839	0.00732812	99.5852	99.5781								267	0.000369501	0.000356038	0.000362769	e268	-6.79552	0.207512	I54	416				e87	268
219+3	0.000516374	0.00676442	99.7333	99.7095								268	0.000335422	0.000317773	0.000326597	e269	-6.60499	0.196182	I55	417				e88	269
219-3	0.000520886	0.00655118	99.7611	99.7099								269	0.000333639	0.000316931	0.000325285	e270	-6.62414	0.198323	I56	418				e89	270
22+3	0.000517693	0.00640053	99.7874	99.7427								270	0.000335174	0.000336173	0.000335673	e271	-7.15685	0.212624	I57	419				e90	271
22-3	0.000588359	0.00681101	99.6912	99.6983								271	0.000553874	0.000519444	0.000536659	e272	-7.34646	0.219539	I58	420				e91	272
220+3	0.000323994	0.00428338	99.8203	99.8078								272	0.000566535	0.00053576	0.000551148	e273	-7.9243	0.237044	I59	421				e92	273
220-3	0.000344857	0.0045852	99.8267	99.8201								273	0.000721954	0.000636209	0.000679081	e274	-8.32261	0.255656	I60	422				e93	274
221+3	0.000469261	0.00596892	99.7492	99.7343								274	0.000334638	0.000340869	0.000337753	e275	-6.85211	0.205053	I61	423				e94	275
221-3	0.000518459	0.00702315	99.7399	99.7067								275	0.000629483	0.000497281	0.000563382	e276	-5.91231	0.285052	I62	424				e95	276
222+3	0.000373644	0.00471534	99.8468	99.7886								276	0.000415432	0.000394869	0.000405151	e277	-7.54274	0.232602	I63	425				e96	277
222-3	0.000490778	0.006378	99.7235	99.7349								277	0.000454915	0.000420741	0.000437828	e278	-7.89795	0.236563	I64	426				e97	278
223+3	0.000339816	0.00431715	99.8713	99.7943								278	0.000661547	0.000571592	0.000616569	e279	-10.431	0.353906	I65	427				e98	279
223-3	0.000402447	0.00538094	99.788	99.781								279	0.000867332	0.000753923	0.000810627	e280	-8.45725	0.265325	I66	428				e99	280
224+3	0.000403001	0.00514002	99.7807	99.754								280	0.00062356	0.000528809	0.000576184	e281	-7.65702	0.227427	I67	429				e100	281
224-3	0.000430103	0.00551344	99.791	99.7668								281	0.000455443	0.000383698	0.000419571	e282	-5.48972	0.168034	I68	430				e101	282
225+3	0.000485612	0.00601855	99.7107	99.6872								282	0.00122858	0.00107662	0.0011526	e283	-2.31832	0.77603	I69	431				e102	283
225-3	0.000600594	0.00726447	99.7418	99.7066								283	0.000361389	0.000327503	0.000344446	e284	-5.57374	0.176759	I70	432				e103	284
226+3	0.000444738	0.00547918	99.7477	99.7145								284	0.000967432	0.000881711	0.000924571	e285	-6.23014	0.210554	I71	433				e104	285
226-3	0.000453714	0.00559186	99.8058	99.7665								285	0.000500199	0.00045315	0.000476675	e286	-5.6604	0.179495	I72	434				e105	286
227+3	0.000317084	0.00443152	99.8262	99.7731								286	0.000461282	0.000399859	0.00043057	e287	-9.44481	0.326503	I73	435				e106	287
227-3	0.00037733	0.005471	99.7822	99.7742								287	0.000406901	0.000340106	0.000373504	e288	-7.75546	0.247381	I74	436				e107	288
228+3	0.000326966	0.00457053	99.8174	99.7682								288	0.000639856	0.000547699	0.000593777	e289	-7.17882	0.213215	I75	437				e108	289
228-3	0.000457949	0.00647039	99.7804	99.7694								289	0.000967037	0.00100566	0.000986348	e290	-5.01962	0.354464	I76	438				e109	290
229+3	0.000258364	0.00372932	99.8979	99.861								290	0.00064726	0.000538527	0.000592893	e291	-5.68935	0.192885	I77	439				e110	291
229-3	0.000197794	0.00261606	99.8956	99.8558								291	0.000463684	0.000333148	0.000398416	e292	-5.44516	0.164894	I78	440				e111	292
23+3	0.00206159	0.022649	98.8621	98.9082								292	0.000408388	0.000365983	0.000387186	e293	-5.38107	0.160146	I79	441				e112	293
23-3	0.00277071	0.0300705	98.3835	98.5344								293	0.000345013	0.000329185	0.000337099	e294	-5.12543	0.154863	I80	442				e113	294
230+3	0.00032457	0.00438379	99.8616	99.8329								294	0.000509314	0.00043534	0.000472327	e295	-6.97393	0.207441	I81	443				e114	295
230-3	0.000249415	0.003184	99.8812	99.8832								295	0.000380912	0.000369597	0.000375255	e296	-5.4364	0.163361	I82	444				e115	296
231+3	0.000596334	0.00748703	99.6745	99.6831								296	0.000639207	0.000594164	0.000616686	e297	-5.87877	0.285858	I83	445				e116	297
231-3	0.000641583	0.00822155	99.6698	99.6329								297	0.000631248	0.000582975	0.000607111	e298	-5.49856	0.237274	I84	446				e117	298
232+3	0.000372153	0.00473834	99.7996	99.7907								298	0.000391959	0.000425677	0.000408818	e299	-4.13858	0.130127	I85	447				e118	299
232-3	0.000386365	0.00493205	99.8341	99.7721								299	0.000348809	0.00037341	0.00036111	e300	-3.85963	0.20414	I86	448				e119	300
233+3	0.00045947	0.00586938	99.7285	99.7102								300	0.000518097	0.000512069	0.000515083	e301	-3.21132	0.185115	I87	449				e120	301
233-3	0.000501599	0.00648933	99.7649	99.744								301	0.000385077	0.000404265	0.000394671	e302	-3.8241	0.129652	I88	450				e121	302
234+3	0.000432374	0.00547073	99.7552	99.7444								302	0.000375919	0.000367914	0.000371916	e303	-6.40851	0.222821	I89	451				e122	303
234-3	0.000444214	0.00567669	99.7954	99.7418								303	0.000474189	0.000469177	0.000471683	e304	-5.6149	0.297685	I90	452				e123	304
235+3	0.000937948	0.0122037	99.4732	99.4558								304	0.000870024	0.000829228	0.000849626	e305	-5.61323	0.313089	I91	453				e124	305
235-3	0.00107428	0.0137827	99.4142	99.4112								305	0.000461695	0.000471728	0.000466711	e306	-4.00699	0.127097	I92	454				e125	306
236+3	0.000769888	0.0101659	99.5728	99.5583								306	0.000570364	0.000572762	0.000571563	e307	-3.89309	0.128035	I93	455				e126	307
236-3	0.0008483	0.0106988	99.5019	99.4898								307	0.000513049	0.000492518	0.000502783	e308	-3.5226	0.17915	I94	456				e127	308
237+3	0.000769888	0.0101659	99.5728	99.5583								308	0.000549402	0.000520192	0.000534797	e309	-9.68543	0.385178	I95	457				e128	309
237-3	0.0008483	0.0106988	99.5019	99.4898								309	0.000449645	0.000392057	0.000420851	e310	-6.90704	0.298248	I96	458				e129	310
238+3	0.00116025	0.0149067	99.3564	99.3518								310	0.0003654	0.000267653	0.000316526	e311	-5.73823	0.252897	I97	459				e130	311
238-3	0.00139653	0.0176259	99.2269	99.2555								311	0.000381059	0.000303831	0.000342445	e312	-4.26002	0.326786	I98	460				e131	312
239+3	0.00110375	0.0144467	99.3077	99.2946								312	0.000361081	0.000288342	0.000324712	e313	-4.61341	0.255959	I99	461				e132	313
239-3	0.00130157	0.0167758	99.307	99.3383								313	0.000341967	0.000260778	0.000301373	e314	-7.04139	0.250826	I100	462				e133	314
24+3	0.00141591	0.0151054	99.2994	99.3182								314	0.000328725	0.000255257	0.000291991	e315	-5.38841	0.248206	I101	463				e134	315
24-3	0.00163752	0.0177359	99.1755	99.158								315	0.000388837	0.000353093	0.000370965	e316	-5.91756	0.306544	I102	464				e135	316
240+3	0.000512065	0.00670956	99.7357	99.7133								316	0.000262615	0.000224921	0.000243768	e317	-4.37374	0.239727	I103	465				e136	317
240-3	0.000510164	0.00640713	99.7711	99.7152								317	0.000279349	0.000199131	0.00023924	e318	-5.98895	0.214992	I104	466				e137	318
241+3	0.000464656	0.006138	99.7618	99.7909								318	0.000306954	0.000230214	0.000268584	e319	-6.19159	0.246672	I105	467				e138	319
241-3	0.000411009	0.00535546	99.7696	99.7747								319	0.000319044	0.000225367	0.000272205	e320	-5.22938	0.192356	I106	468				e139	320
242+3	0.000493369	0.0066787	99.7595	99.7697								320	0.000318249	0.000268099	0.000293174	e321	-4.7745	0.294601	I107	469				e140	321
242-3	0.000747898	0.0100542	99.5275	99.5329								321	0.00033187	0.00029743	0.00031465	e322	-3.87713	0.361308	I108	470				e141	322
243+3	0.00041174	0.00539908	99.8129	99.8381								322	0.000359861	0.000313959	0.00033691	e323	-5.87902	0.297449	I109	471				e142	323
243-3	0.000393768	0.0049589	99.8049	99.7979								323	0.000261821	0.000181259	0.00022154	e324	-4.957	0.159525	I110	472				e143	324
244+3	0.000519191	0.0061499	99.7044	99.7147								324	0.000471382	0.000416913	0.000444147	e325	-3.8542	0.391887	I111	473				e144	325
244-3	0.00052809	0.00671405	99.7548	99.7352								325	0.000296056	0.000210429	0.000253242	e326	-4.49254	0.2624	I112	474				e145	326
245+3	0.000549037	0.00685669	99.6813	99.6973								326	0.000278228	0.000193699	0.000235964	e327	-5.41115	0.174487	I113	475				e146	327
245-3	0.000508331	0.00609065	99.7729	99.7442								327	0.000299917	0.000246516	0.000273217	e328	-5.10495	0.255343	I114	476				e147	328
246+3	0.00032394	0.00454646	99.89	99.8557								328	0.000458209	0.000402821	0.000430515	e329	-4.68635	0.335546	I115	477				e148	329
246-3	0.00039908	0.00517017	99.7635	99.7753								329	0.000385556	0.000314597	0.000350077	e330	-4.46565	0.209066	I116	478				e149	330
247+3	0.000571167	0.00705102	99.7036	99.7111								330	0.000347776	0.000267017	0.000307396	e331	-4.53031	0.18922	I117	479				e150	331
247-3	0.000531483	0.00632879	99.7717	99.7441								331	0.000314513	0.000252731	0.000283622	e332	-5.30984	0.268283	I118	480				e151	332
248+3	0.000547162	0.00682033	99.707	99.7327								332	0.000360898	0.00028586	0.000323379	e333	-3.33953	0.343073	I119	481				e152	333
248-3	0.00057357	0.00677128	99.6812	99.6685								333	0.000382638	0.000322205	0.000352421	e334	-3.03484	0.427521	I120	482				e153	334
249+3	0.000601235	0.0075809	99.6879	99.7217								334	0.000328116	0.000248591	0.000288353	e335	-5.14405	0.275798	I121	483				e154	335
249-3	0.000556254	0.00673503	99.7032	99.7051								335	0.000276045	0.000224614	0.000250329	e336	-4.80871	0.285797	I122	484				e155	336
25+3	0.00031142	0.00403428	99.8139	99.8173								336	0.000255961	0.000176452	0.000216207	e337	-5.23764	0.157304	I123	485				e156	337
25-3	0.000478444	0.00625656	99.7491	99.7607								337	0.000360442	0.000291505	0.000325973	e338	-4.14499	0.309584	I124	486				e157	338
250+3	0.00120971	0.0127425	99.4363	99.3905								338	0.000267075	0.000223732	0.000245404	e339	-4.5837	0.15935	I125	487				e158	339
250-3	0.00126897	0.0129228	99.396	99.471								339	0.000334274	0.000253714	0.000293994	e340	-5.5495	0.284387	I126	488				e159	340
251+3	0.000563693	0.00703278	99.6926	99.6993								340	0.000301039	0.0002141	0.000257569	e341	-4.89743	0.258978	I127	489				e160	341
251-3	0.00055398	0.00694297	99.7404	99.7214								341	0.000452	0.000401113	0.000426556	e342	-3.77337	0.364531	I128	490				e161	342
252+3	0.000581388	0.00703626	99.6914	99.6965								342	0.000278504	0.000240882	0.000259693	e343	-4.70625	0.180687	I129	491				e162	343
252-3	0.000546009	0.00624857	99.6938	99.6943								343	0.000670682	0.000693151	0.000681917	e344	-4.6386	0.275953	I130	492				e163	344
253+3	0.000636879	0.00798337	99.6794	99.6764								344	0.00110601	0.000911177	0.00100859	e345	-5.12827	0.383553	I131	493				e164	345
253-3	0.000622648	0.00770231	99.6726	99.6545								345	0.000868623	0.000779736	0.000824179	e346	-4.43107	0.280686	I132	494				e165	346
254+3	0.0004873	0.00621607	99.7924	99.8105								346	0.000627671	0.000538456	0.000583063	e347	-4.25551	0.228887	I133	495				e166	347
254-3	0.000500361	0.00606158	99.741	99.7247								347	0.000332498	0.000236994	0.000284746	e348	-5.30269	0.202297	I134	496				e167	348
255+3	0.000395907	0.00527706	99.8064	99.8053								348	0.000278733	0.000165137	0.000221935	e349	-5.69328	0.181102	I135	497				e168	349
255-3	0.000483596	0.00638628	99.7513	99.7137								349	0.000360858	0.000261462	0.00031116	e350	-5.69817	0.17188	I136	498				e169	350
256+3	0.00055209	0.00696708	99.7105	99.7227								350	0.000332498	0.000236994	0.000284746	e351	-5.66057	0.196744	I137	499				e170	351
256-3	0.0005093	0.00631893	99.7298	99.7218								351	0.000346648	0.000227867	0.000287258	e352	-5.00063	0.245959	I138	500				e171	352
257+3	0.000547101	0.00689659	99.7125	99.7217								352	0.000371903	0.00027173	0.000321817	e353	-5.57035	0.166757	I139	501				e172	353
257-3	0.000512828	0.00634768	99.7487	99.7323								353	0.000289993	0.000232525	0.000261259	e354	-5.10908	0.204462	I140	502				e173	354
258+3	0.000420131	0.00569296	99.7851	99.8151								354	0.000360991	0.000261453	0.000311222	e355	-4.63199	0.165325	I141	503				e174	355
258-3	0.000395581	0.00516473	99.7526	99.7375								355	0.000334219	0.000242956	0.000288588	e356	-4.49309	0.134262	I142	504				e175	356
259+3	0.000338723	0.00481531	99.8462	99.8173								356	0.000336818	0.000239969	0.000288394	e357	-5.01884	0.153393	I143	505				e176	357
259-3	0.00033955	0.00443963	99.8454	99.829								357	0.000338076	0.00024053	0.000289303	e358	-4.98369	0.152407	I144	506				e177	358
26+3	0.000277397	0.0033554	99.8885	99.8874								358	0.000256485	0.000214709	0.000235597	e359	-4.55964	0.161248	I145	507				e178	359
26-3	0.00042394	0.00522946	99.8549	99.8096								359	0.00034971	0.000303936	0.000326823	e360	-3.86491	0.399488	I146	508				e179	360
260+3	0.000318993	0.00458929	99.851	99.8248								360	0.000320395	0.000267068	0.000293732	e361	-3.5416	0.29066	I147	509				e180	361
260-3	0.000337975	0.00442225	99.8473	99.8298								361	0.000414762	0.000344717	0.000379739	e362	-5.91601	0.273718	I148	510				e181	362
261+3	0.000350913	0.00505672	99.845	99.817								362	0.0002772	0.000198289	0.000237745	e363	-5.60456	0.169426	I149	511				e215	363
261-3	0.000407688	0.00575285	99.7565	99.7443								363	0.000380912	0.000369597	0.000375255	e364	-5.4364	0.163361	I150	512				e216	364
262+3	0.000602127	0.00792427	99.7113	99.6978								364	0.000342877	0.000394279	0.000368578	e365	-9.64591	0.297126	I151	513				e217	365
262-3	0.000627084	0.00794548	99.595	99.63								365	0.000304135	0.000350582	0.000327358	e366	-8.33857	0.247718	I152	514				e218	366
263+3	0.000591646	0.00777194	99.7186	99.6932								366	0.000282475	0.000326098	0.000304287	e367	-5.73219	0.220992	I153	515				e219	367
263-3	0.000627453	0.00779304	99.5955	99.6165								367	0.00029725	0.000343246	0.000320248	e368	-8.01357	0.242254	I154	516				e220	368
264+3	0.000337822	0.00479201	99.857	99.8223								368	0.000319382	0.000367877	0.000343629	e369	-9.17858	0.273909	I155	517				e221	369
264-3	0.000361248	0.00467544	99.7424	99.7475								369	0.000334839	0.000385429	0.000360134	e370	-9.0235	0.288963	I156	518				e222	370
265+3	0.00060595	0.00790371	99.7193	99.6987								370	0.000270122	0.000309455	0.000289788	e371	-6.03128	0.197818	I157	519				e223	371
265-3	0.000649474	0.00805366	99.5636	99.6074								371	0.000270122	0.000309455	0.000289788	e372	-6.77433	0.202352	I158	520				e224	372
266+3	0.000510269	0.00690723	99.7478	99.7557								372	0.000288806	0.000334793	0.0003118	e373	-5.30074	0.22729	I159	521				e225	373
266-3	0.00054021	0.00693031	99.6461	99.6864								373	0.000270122	0.000309455	0.000289788	e374	-6.59375	0.196829	I160	522				e226	374
267+3	0.000356038	0.00499438	99.8374	99.7899								374	0.000276417	0.000317724	0.000297071	e375	-6.55488	0.209523	I161	523				e227	375
267-3	0.000369501	0.00473017	99.7668	99.7613								375	0.000263238	0.00030124	0.000282239	e376	-6.55051	0.194993	I162	524				e228	376
268+3	0.000317773	0.00457943	99.8591	99.8292								376	0.000270122	0.000309455	0.000289788	e377	-6.33873	0.195624	I163	525				e229	377
268-3	0.000335422	0.00441157	99.799	99.7912								377	0.000327008	0.00037664	0.000351824	e378	-9.24973	0.275741	I164	526				e230	378
269+3	0.000316931	0.00459831	99.8582	99.8279								378	0.000263238	0.00030124	0.000282239	e379	-6.16291	0.188223	I165	527				e231	379
269-3	0.000333639	0.00442603	99.8087	99.7932								379	0.000319382	0.000367877	0.000343629	e380	-8.13289	0.266517	I166	528				e232	380
27+3	0.000198924	0.00258179	99.9081	99.9191								380	0.000421512	0.000480693	0.000451102	e381	-11.6025	0.380126	I167	529				e233	381
27-3	0.000315146	0.00416017	99.7965	99.8375								381	0.00031658	0.000382779	0.000349679	e382	-6.9882	0.208362	I168	530				e234	382
270+3	0.000336173	0.00476484	99.8559	99.8226								382	0.000308894	0.000360363	0.000334628	e383	-6.62649	0.198275	I169	531				e235	383
270-3	0.000335174	0.00435439	99.8131	99.8004								383	0.000308894	0.000360363	0.000334628	e384	-6.55506	0.198681	I170	532				e236	384
271+3	0.000519444	0.00683949	99.7616	99.7528								384	0.000337912	0.0004048	0.000371356	e385	-7.87081	0.244061	I171	533				e237	385
271-3	0.000553874	0.0068806	99.6799	99.7093								385	0.000292314	0.000344576	0.000318445	e386	-6.17103	0.183297	I172	534				e238	386
272+3	0.00053576	0.00708519	99.7492	99.7313								386	0.000298003	0.000354391	0.000326197	e387	-6.17727	0.186163	I173	535				e239	387
272-3	0.000566535	0.00710878	99.6341	99.6673								387	0.000308894	0.000360363	0.000334628	e388	-6.09189	0.199143	I174	536				e240	388
273+3	0.000636209	0.00800201	99.6918	99.6561								388	0.000298003	0.000354391	0.000326197	e389	-6.09481	0.187435	I175	537				e241	389
273-3	0.000721954	0.00895839	99.5672	99.5933								389	0.00035422	0.000440909	0.000397564	e390	-5.01813	0.249732	I176	538				e242	390
274+3	0.000340869	0.00492331	99.8318	99.8003								390	0.00035323	0.00043737	0.0003953	e391	-9.86331	0.310573	I177	539				e243	391
274-3	0.000334638	0.00446601	99.8117	99.7956								391	0.000308894	0.000360363	0.000334628	e392	-5.07055	0.196796	I178	540				e244	392
275+3	0.000497281	0.00680116	99.6945	99.6992								392	0.000391687	0.000381704	0.000386696	e393	-10.5054	0.315399	I179	541				e245	393
275-3	0.000629483	0.00796922	99.7606	99.7289								393	0.000373991	0.000316872	0.000345432	e394	-9.83804	0.293931	I180	542				e246	394
276+3	0.000394869	0.0056972	99.7664	99.7604								394	0.000475614	0.00042685	0.000451232	e395	-9.23177	0.281676	I181	543				e247	395
276-3	0.000415432	0.00558425	99.8216	99.7887								395	0.000655233	0.000496413	0.000575823	e396	-8.43677	0.253852	I182	544				e248	396
277+3	0.000420741	0.00589784	99.7657	99.7581								396	0.000378847	0.00042348	0.000401164	e397	-11.5735	0.378708	I183	545				e249	397
277-3	0.000454915	0.00590431	99.807	99.7685								397	0.000651444	0.000588675	0.00062006	e398	-7.36273	0.280943	I184	546				e250	398
278+3	0.000571592	0.00772976	99.6648	99.6836								398	0.000472287	0.000432219	0.000452253	e399	-8.80424	0.268914	I185	547				e251	399
278-3	0.000661547	0.00834448	99.7094	99.6496								399	0.000365601	0.000329101	0.000347351	e400	-8.76923	0.260471	I186	548				e252	400
279+3	0.000753923	0.00996743	99.5504	99.5419								400	0.000364155	0.000312502	0.000338328	e401	-9.22334	0.27406	I187	549				e253	401
279-3	0.000867332	0.0114209	99.5455	99.5404								401	0.000427172	0.000371049	0.00039911	e402	-8.60982	0.265123	I188	550				e254	402
28+3	0.000268997	0.00369291	99.8979	99.8862								402	0.000453489	0.000408474	0.000430981	e403	-6.98961	0.295902	I189	551				e255	403
28-3	0.000356449	0.00418853	99.8459	99.837								403	0.000679857	0.000509492	0.000594674	e404	-8.49708	0.263268	I190	552				e256	404
280+3	0.000528809	0.00688834	99.7161	99.688								404	0.000418097	0.000352318	0.000385207	e405	-5.34194	0.399324	I191	553				e257	405
280-3	0.00062356	0.00742447	99.6456	99.6764								405	0.000352593	0.00042572	0.000389156	e406	-7.32989	0.281357	I192	554				e258	406
281+3	0.000383698	0.00477158	99.7668	99.7913								406	0.000293216	0.000246488	0.000269852	e407	-5.1117	0.238586	I193	555				e259	407
281-3	0.000455443	0.0055825	99.7721	99.7681								407	0.00026215	0.000235251	0.0002487	e408	-6.59245	0.206094	I194	556				e260	408
282+3	0.00107662	0.012738	99.4102	99.3742								408	0.00026215	0.000235251	0.0002487	e409	-6.58198	0.207964	I195	557				e261	409
282-3	0.00122858	0.0145524	99.3329	99.3348								409	0.000295561	0.000242718	0.00026914	e410	-8.13698	0.271176	I196	558				e262	410
283+3	0.000327503	0.00404804	99.8344	99.8364								410	0.000447223	0.000455791	0.000451507	e411	-5.44567	0.257513	I197	559				e263	411
283-3	0.000361389	0.00444696	99.8224	99.8055								411	0.000293216	0.000246488	0.000269852	e412	-7.99083	0.240625	I198	560				e264	412
284+3	0.000881711	0.0097221	99.6317	99.5937								412	0.000505009	0.000502784	0.000503896	e413	-7.96137	0.338844	I199	561				e265	413
284-3	0.000967432	0.0107395	99.5574	99.4698								413	0.000575189	0.00058794	0.000581565	e414	-6.99482	0.321253	I200	562				e266	414
285+3	0.00045315	0.00610843	99.7715	99.7879								414	0.000486417	0.000491775	0.000489096	e415	-7.48317	0.327755	I201	563				e267	415
285-3	0.000500199	0.00633356	99.7213	99.7319								415	0.000545954	0.000539051	0.000542502	e416	-6.58261	0.385045	I202	564				e268	416
286+3	0.000399859	0.00503608	99.7643	99.7435								416	0.000297378	0.000323726	0.000310552	e417	-6.61982	0.298804	I203	565				e269	417
286-3	0.000461282	0.00611644	99.7805	99.7693								417	0.000443278	0.000426924	0.000435101	e418	-5.67939	0.252896	I204	566				e270	418
287+3	0.000340106	0.00434466	99.7898	99.7986								418	0.000268067	0.000351164	0.000309616	e419	-5.52449	0.169817	I205	567				e271	419
287-3	0.000406901	0.0054749	99.7994	99.7966								419	0.000252059	0.000307344	0.000279701	e420	-6.22601	0.250432	I206	568				e272	420
288+3	0.000547699	0.00744006	99.6704	99.6052								420	0.000253774	0.000266746	0.00026026	e421	-4.78802	0.163455	I207	569				e273	421
288-3	0.000639856	0.00853972	99.6224	99.6216								421	0.000230383	0.000290864	0.000260623	e422	-4.70024	0.148985	I208	570				e274	422
289+3	0.00100566	0.0127245	99.3995	99.3756								422	0.000499304	0.000453764	0.000476534	e423	-6.31371	0.358397	I209	571				e275	423
289-3	0.000967037	0.0121786	99.4994	99.5101								423	0.0006845	0.000639619	0.000662059	e424	-9.76645	0.330167	I210	572				e276	424
29+3	0.000311735	0.00438508	99.8627	99.8635								424	0.000295826	0.000302253	0.00029904	e425	-6.1181	0.182162	I211	573				e277	425
29-3	0.000540988	0.00641564	99.7287	99.7231								425	0.000287565	0.000291159	0.000289362	e426	-5.56317	0.165237	I212	574				e278	426
290+3	0.000538527	0.00652103	99.7137	99.6677								426	0.000185974	0.000212606	0.00019929	e427	-6.66728	0.201775	I213	575				e279	427
290-3	0.00064726	0.00779696	99.5711	99.5294								427	0.00029893	0.000350011	0.00032447	e428	-6.06757	0.180234	I214	576				e280	428
291+3	0.000333148	0.00437193	99.815	99.8113								428	0.000312761	0.000360589	0.000336675	e429	-6.00286	0.193488	I215	577				e281	429
291-3	0.000463684	0.00597787	99.7939	99.795								429	0.000532459	0.000603145	0.000567802	e430	-5.70803	0.176746	I216	578				e282	430
292+3	0.000365983	0.00507641	99.8175	99.838								430	0.000505539	0.000580411	0.000542975	e431	-5.30265	0.167891	I217	579				e283	431
292-3	0.000408388	0.00558988	99.7839	99.7852								431	0.000198734	0.000228272	0.000213503	e432	-7.13791	0.234868	I218	580				e284	432
293+3	0.000329185	0.00467528	99.8486	99.8317								432	0.000182553	0.00021783	0.000200192	e433	-7.17225	0.214572	I219	581				e285	433
293-3	0.000345013	0.00447306	99.8372	99.8195								433	0.000157288	0.000184783	0.000171035	e434	-4.87785	0.159194	I220	582				e286	434
294+3	0.00043534	0.00547545	99.7603	99.757								434	0.000147236	0.000160774	0.000154005	e435	-4.64397	0.13924	I221	583				e287	435
294-3	0.000509314	0.00633904	99.7448	99.7201								435	0.000144962	0.000155106	0.000150034	e436	-4.27165	0.127075	I222	584				e288	436
295+3	0.000369597	0.00475938	99.81	99.7783								436	0.000176313	0.000205015	0.000190664	e437	-5.85325	0.181013	I223	585				e289	437
295-3	0.000380912	0.00449143	99.8202	99.8356								437	0.000176313	0.000205015	0.000190664	e438	-4.99986	0.175111	I224	586				e290	438
296+3	0.000594164	0.00800996	99.6974	99.6571								438	0.000212957	0.000221861	0.000217409	e439	-6.04985	0.238311	I225	587				e291	439
296-3	0.000639207	0.0082735	99.568	99.5944								439	0.000176313	0.000205015	0.000190664	e440	-6.14273	0.18248	I226	588				e292	440
297+3	0.000582975	0.00747515	99.7181	99.6866								440	0.000846069	0.00082758	0.000836824	e441	-7.01232	0.46754	I227	589				e293	441
297-3	0.000631248	0.00774371	99.6056	99.6062								441	0.000247287	0.000288537	0.000267912	e442	-8.35514	0.325232	I228	590				e294	442
298+3	0.000425677	0.00573066	99.8066	99.785								442	0.000214324	0.000270314	0.000242319	e443	-6.33219	0.274459	I229	591				e295	443
298-3	0.000391959	0.00501531	99.7805	99.7913								443	0.00028619	0.000320687	0.000303439	e444	-8.479	0.404083	I230	592				e296	444
299+3	0.00037341	0.005025	99.8456	99.8316								444	0.000191026	0.000218691	0.000204858	e445	-6.56302	0.204594	I231	593				e297	445
299-3	0.000348809	0.00441027	99.8055	99.8109								445	0.000224792	0.000239786	0.000232289	e446	-8.78448	0.265232	I232	594				e298	446
3+3	0.00264548	0.0275526	98.7028	98.7571								446	0.000213815	0.000269311	0.000241563	e447	-8.73373	0.260013	I233	595				e299	447
3-3	0.00425815	0.0441558	98.0117	98.0116								447	0.000176313	0.000205015	0.000190664	e448	-4.69665	0.184173	I234	596				e300	448
30+3	0.00404097	0.0395009	98.2831	98.2137								448	0.000214324	0.000270314	0.000242319	e449	-8.88637	0.273449	I235	597				e301	449
30-3	0.00522827	0.0507195	97.3577	97.5104								449	0.000200266	0.000230511	0.000215389	e450	-6.77524	0.237197	I236	598				e302	450
300+3	0.000512069	0.00564379	99.7549	99.7481								450	0.000235863	0.000291328	0.000263595	e451	-4.58256	0.146872	I237	599				e303	451
300-3	0.000518097	0.00573839	99.7688	99.7667								451	0.000276727	0.000393188	0.000334957	e452	-6.89875	0.227474	I238	600				e304	452
301+3	0.000404265	0.0054868	99.824	99.7985								452	0.000214324	0.000270314	0.000242319	e453	-9.12264	0.270969	I239	601				e305	453
301-3	0.000385077	0.00531945	99.7921	99.7508								453	0.000182553	0.00021783	0.000200192	e454	-6.97883	0.208599	I240	602				e306	454
302+3	0.000367914	0.00468527	99.8223	99.8014								454	0.000245486	0.00026114	0.000253313	e455	-9.13466	0.299234	I241	603				e307	455
302-3	0.000375919	0.00480184	99.7882	99.7897								455	0.000213815	0.000269311	0.000241563	e456	-8.42527	0.258382	I242	604				e308	456
303+3	0.000469177	0.00585885	99.7815	99.7399								456	0.000200266	0.000230511	0.000215389	e457	-5.06827	0.237016	I243	605				e309	457
303-3	0.000474189	0.00598153	99.7206	99.7216								457	0.000260719	0.000363941	0.00031233	e458	-9.26231	0.276697	I244	606				e310	458
304+3	0.000829228	0.0104487	99.598	99.4988								458	0.000224792	0.000239786	0.000232289	e459	-9.23392	0.27458	I245	607				e311	459
304-3	0.000870024	0.0106551	99.3399	99.3891								459	0.00022328	0.000293271	0.000258275	e460	-9.32114	0.278271	I246	608				e312	460
305+3	0.000471728	0.00555214	99.796	99.7816								460	0.000236674	0.000299666	0.00026817	e461	-5.12523	0.16399	I247	609				e313	461
305-3	0.000461695	0.00586789	99.8013	99.7621								461	0.00022328	0.000293271	0.000258275	e462	-9.33881	0.279775	I248	610				e314	462
306+3	0.000572762	0.00661735	99.7364	99.7493								462	0.000336849	0.000342436	0.000339642	e463	-9.44651	0.307418	I249	611				e315	463
306-3	0.000570364	0.00672128	99.7517	99.683								463	0.000283567	0.000293484	0.000288525	e464	-7.73897	0.302696	I250	612				e316	464
307+3	0.000492518	0.00613667	99.7616	99.7218								464	0.000510949	0.000593346	0.000552147	e465	-6.33086	0.368533	I251	613				e317	465
307-3	0.000513049	0.00647041	99.7063	99.6739								465	0.000335227	0.000313553	0.00032439	e466	-9.6044	0.295473	I252	614				e318	466
308+3	0.000520192	0.00655954	99.7302	99.6869								466	0.000347422	0.000343283	0.000345353	e467	-9.6435	0.291256	I253	615				e319	467
308-3	0.000549402	0.00690428	99.7548	99.7407								467	0.000212441	0.00022114	0.00021679	e468	-7.47713	0.234749	I254	616				e320	468
309+3	0.000392057	0.00493814	99.7941	99.7431								468	0.000361491	0.000441607	0.000401549	e469	-9.71851	0.288652	I255	617				e321	469
309-3	0.000449645	0.00568717	99.7884	99.7716								469	0.000212441	0.00022114	0.00021679	e470	-7.66944	0.233492	I256	618				e322	470
31+3	0.00012667	0.00224567	99.9553	99.9596								470	0.000400708	0.000484786	0.000442747	e471	-6.59576	0.301904	I257	619				e323	471
31-3	0.000146128	0.00210673	99.9139	99.9401								471	0.000273647	0.000391531	0.000332589	e472	-6.46285	0.223536	I258	620				e324	472
310+3	0.000267653	0.00361948	99.8193	99.7483								472	0.000280807	0.000394876	0.000337842	e473	-7.83335	0.240409	I259	621				e325	473
310-3	0.0003654	0.00473481	99.8186	99.7801								473	0.000282088	0.000282538	0.000282313	e474	-9.21775	0.277141	I260	622				e326	474
311+3	0.000303831	0.00373077	99.8513	99.798								474	0.000361491	0.000441607	0.000401549	e475	-7.84705	0.294688	I261	623				e327	475
311-3	0.000381059	0.00491776	99.8339	99.7999								475	0.000367309	0.000414962	0.000391135	e476	-6.02466	0.253417	I262	624				e328	476
312+3	0.000288342	0.00344279	99.8652	99.8607								476	0.000277462	0.000272933	0.000275197	e477	-6.65157	0.209474	I263	625				e329	477
312-3	0.000361081	0.00438124	99.8353	99.8001								477	0.000344544	0.00043384	0.000389192	e478	-7.84179	0.271508	I264	626				e330	478
313+3	0.000260778	0.00333222	99.8556	99.8625								478	0.000279287	0.000276325	0.000277806	e479	-7.97469	0.238104	I265	627				e331	479
313-3	0.000341967	0.00421659	99.8352	99.7956								479	0.000345647	0.000345477	0.000345562	e480	-10.1177	0.334847	I266	628				e332	480
314+3	0.000255257	0.00331522	99.8428	99.8367								480	0.000245565	0.000297106	0.000271335	e481	-7.98389	0.325541	I267	629				e333	481
314-3	0.000328725	0.00421727	99.8439	99.7999								481	0.000276907	0.000271863	0.000274385	e482	-6.7542	0.204101	I268	630				e334	482
315+3	0.000353093	0.00485904	99.8253	99.7921								482	0.000279287	0.000276325	0.000277806	e483	-7.72695	0.239171	I269	631				e335	483
315-3	0.000388837	0.00533384	99.8252	99.8043								483	0.00023091	0.00029845	0.00026468	e484	-8.26024	0.304404	I270	632				e336	484
316+3	0.000224921	0.00296721	99.8921	99.8734								484	0.000231533	0.000300408	0.00026597	e485	-10.5465	0.313239	I271	633				e337	485
316-3	0.000262615	0.00343119	99.8705	99.8613								485	0.000282827	0.000313132	0.000297979	e486	-8.41304	0.291428	I272	634				e338	486
317+3	0.000199131	0.00275128	99.8877	99.8809								486	0.000319635	0.000320209	0.000319922	e487	-10.7512	0.328442	I273	635				e339	487
317-3	0.000279349	0.00359937	99.8533	99.858								487	0.00022328	0.000293271	0.000258275	e488	-8.65216	0.277769	I274	636				e340	488
318+3	0.000230214	0.00318288	99.8481	99.8436								488	0.000263042	0.000334231	0.000298636	e489	-10.9756	0.37261	I275	637				e341	489
318-3	0.000306954	0.00400717	99.8334	99.8352								489	0.000303449	0.00034075	0.0003221	e490	-11.0219	0.458321	I276	638				e342	490
319+3	0.000225367	0.00342832	99.8987	99.8846								490	0.000263042	0.000334231	0.000298636	e491	-9.01134	0.373953	I277	639				e343	491
319-3	0.000319044	0.00445156	99.8539	99.8551								491	0.0002588	0.000315109	0.000286955	e492	-10.5537	0.353516	I278	640				e344	492
32+3	0.00221574	0.0208256	99.148	99.2728								492	0.000263042	0.000334231	0.000298636	e493	-11.3202	0.36519	I279	641				e345	493
32-3	0.0021314	0.0205195	99.1665	99.138								493	0.000372844	0.000417425	0.000395135	e494	-10.279	0.408066	I280	642				e346	494
320+3	0.000268099	0.00341368	99.8591	99.8175								494	0.000374784	0.000420589	0.000397687	e495	-12.4845	0.432885	I281	643				e347	495
320-3	0.000318249	0.00402579	99.8532	99.8141								495	0.000102139	9.6656e-05	9.93975e-05	e496	-6.68109	0.200715	I282	644				e348	496
321+3	0.00029743	0.00380083	99.8428	99.8251								496	0.000219985	0.000235279	0.000227632	e497	-4.20082	0.164676	I283	645				e349	497
321-3	0.00033187	0.00466481	99.8273	99.8031								497	0.000145632	0.000161288	0.00015346	e498	-6.33313	0.21847	I284	646				e350	498
322+3	0.000313959	0.00408613	99.8498	99.8335								498	5.15214e-05	7.50557e-05	6.32885e-05	e499	-4.00725	0.132945	I285	647				e351	499
322-3	0.000359861	0.00468265	99.8069	99.8079								499	0.000110876	0.000101311	0.000106094	e500	-6.78017	0.224089	I286	648				e352	500
323+3	0.000181259	0.00252022	99.9102	99.8959								500	8.87833e-05	8.43432e-05	8.65633e-05	e501	-5.84368	0.174914	I287	649				e353	501
323-3	0.000261821	0.00339936	99.8686	99.8652								501	0.000311376	0.000293776	0.000302576	e502	-6.13453	0.298395	I288	650				e354	502
324+3	0.000416913	0.00570201	99.7778	99.7692								502	0.00023046	0.000205429	0.000217945	e503	-6.99746	0.215089	I289	651				e355	503
324-3	0.000471382	0.00630349	99.7446	99.7411								503	0.000304758	0.00027997	0.000292364	e504	-9.66384	0.290829	I290	652				e356	504
325+3	0.000210429	0.00286104	99.88	99.8806								504	0.000287172	0.0002444	0.000265786	e505	-6.70015	0.233513	I291	653				e357	505
325-3	0.000296056	0.00380644	99.844	99.8407								505	6.70998e-05	7.38987e-05	7.04992e-05	e506	-4.63184	0.229861	I292	654				e358	506
326+3	0.000193699	0.0026054	99.8977	99.8894								506	0.000614062	0.00056297	0.000588516	e507	-4.71002	0.185429	I293	655				e359	507
326-3	0.000278228	0.00358755	99.8527	99.8606								507	0.000118935	9.79216e-05	0.000108428	e508	-9.5021	0.370687	I295	656				e360	508
327+3	0.000246516	0.00362738	99.8587	99.8641								508	0.000323761	0.000174603	0.000249182	e509	-8.74304	0.421585	I296	657				e361	509
327-3	0.000299917	0.00380452	99.8391	99.8305								509	0.000143059	0.00010324	0.000123149	e510	-8.63689	0.325259	I297	658				e362	510
328+3	0.000402821	0.00552371	99.8178	99.8115								510	1.45627e-05	4.73377e-06	9.64823e-06	e511	-8.44765	0.370605	I301	659				e363	511
328-3	0.000458209	0.00616806	99.74	99.7328								511	2.08471e-05	5.14234e-06	1.29947e-05	e512	-7.86683	0.382601	I302	660				e364	512
329+3	0.000314597	0.00440233	99.8489	99.8433								512	7.6372e-06	4.5676e-06	6.1024e-06	e513	-6.71682	0.368151	I303	661				e365	513
329-3	0.000385556	0.00523493	99.8206	99.788								513	0.000289506	0.000277008	0.000283257	e514	-3.84479	0.25633	I304	662				e366	514
33+3	0.0017838	0.0183243	99.1436	99.1248								514	1.64728e-06	3.59686e-07	1.00348e-06	e515	-7.12001	0.332291	I305	663				e367	515
33-3	0.00247173	0.025456	98.7222	98.7853								515	0.00124107	0.000783629	0.00101235	e516	-5.49991	0.567726	I306	664				e368	516
330+3	0.000267017	0.00393293	99.891	99.8664								516	1.12267e-06	2.62308e-07	6.92489e-07	e517	-5.18372	0.308714	I307	665				e369	517
330-3	0.000347776	0.00477811	99.8326	99.8327								517	0.000608918	0.000390866	0.000499892	e518	-5.21849	0.311945	I308	666				e370	518
331+3	0.000252731	0.00370439	99.8632	99.8732								518	0.00046046	0.000436857	0.000448659	e519	-5.42027	0.184501	M1	667				e371	519
331-3	0.000314513	0.00400682	99.8204	99.808								519	0.000200755	0.00017636	0.000188558	e520	-4.05234	0.147834	M2	668				e372	520
332+3	0.00028586	0.00359277	99.8417	99.8487								520	0.000291866	0.000268559	0.000280213	e521	-5.84819	0.251307	M3	669				e373	521
332-3	0.000360898	0.00445687	99.8274	99.7745								521	0.000228179	0.000203848	0.000216013	e522	-6.00756	0.179609	M4	670				e374	522
333+3	0.000322205	0.00399728	99.8183	99.8167								522	0.000394011	0.000370686	0.000382348	e523	-4.78226	0.15429	M5	671				e375	523
333-3	0.000382638	0.0047282	99.7904	99.76								523	0.00046046	0.000436857	0.000448659	e524	-6.17472	0.183394	M6	672				e376	524
334+3	0.000248591	0.00315562	99.8709	99.862								524	0.000215627	0.0001924	0.000204013	e525	-5.7135	0.18852	M7	673				e377	525
334-3	0.000328116	0.00417588	99.8348	99.7995								525	0.000334367	0.000357657	0.000346012	e526	-4.5861	0.232715	M8	674				e378	526
335+3	0.000224614	0.00295256	99.8869	99.9001								526	0.000228179	0.000203848	0.000216013	e527	-5.42581	0.176966	M9	675				e379	527
335-3	0.000276045	0.00349293	99.8579	99.8452								527	0.000347165	0.000370476	0.00035882	e528	-5.92119	0.243305	M10	676				e380	528
336+3	0.000176452	0.00242613	99.9145	99.9009								528	0.000337601	0.000314455	0.000326028	e529	-5.25076	0.304526	M11	677				e381	529
336-3	0.000255961	0.00330786	99.8688	99.8668								529	0.000228179	0.000203848	0.000216013	e530	-5.91273	0.18218	M12	678				e382	530
337+3	0.000291505	0.00369508	99.8496	99.8429								530	0.00026291	0.000238546	0.000250728	e531	-8.38361	0.249057	M13	679				e383	531
337-3	0.000360442	0.00442068	99.8063	99.7744								531	0.000285687	0.000313838	0.000299763	e532	-10.4128	0.314504	M14	680				e384	532
338+3	0.000223732	0.00287729	99.8784	99.8849								532	0.000925819	0.000899393	0.000912606	e533	-11.5078	0.387254	M15	681				e385	533
338-3	0.000267075	0.00345516	99.8769	99.8577								533	0.000491306	0.000470994	0.00048115	e534	-11.4804	0.471906	M16	682				e386	534
339+3	0.000253714	0.00330769	99.8599	99.8518								534	0.000429042	0.000406674	0.000417858	e535	-12.8774	0.396732	M17	683				e387	535
339-3	0.000334274	0.00432404	99.8348	99.799								535	0.000526228	0.000550193	0.000538211	e536	-12.4668	0.38476	M18	684				e388	536
34+3	0.0012754	0.0124436	99.3635	99.3832								536	0.000393835	0.000418931	0.000406383	e537	-8.80002	0.439882	M19	685				e389	537
34-3	0.00137254	0.0138808	99.3703	99.3512								537	0.00172667	0.00163583	0.00168125	e538	-10.5391	0.415199	M20	686				e390	538
340+3	0.0002141	0.00293902	99.8784	99.8741								538	0.000969662	0.000943569	0.000956616	e539	-11.1279	0.406656	M21	687				e391	539
340-3	0.000301039	0.00389613	99.8305	99.8309								539	0.000454744	0.000434183	0.000444463	e540	-10.6854	0.434958	M22	688				e392	540
341+3	0.000401113	0.00549273	99.8012	99.7872								540	0.000392482	0.000369897	0.000381189	e541	-11.3505	0.358727	M23	689				e393	541
341-3	0.000452	0.00602461	99.771	99.7724								541	0.000538989	0.000563022	0.000551005	e542	-10.9808	0.391442	M24	690				e394	542
342+3	0.000240882	0.00307014	99.8858	99.8791								542	0.00112547	0.00109754	0.00111151	e543	-9.72168	0.482313	M25	691				e395	543
342-3	0.000278504	0.00355507	99.8745	99.846								543	0.000969662	0.000943569	0.000956616	e544	-11.591	0.414563	M26	692				e396	544
343+3	0.000693151	0.00863204	99.677	99.618								544	0.000881122	0.000855383	0.000868253	e545	-11.8631	0.368546	M27	693				e397	545
343-3	0.000670682	0.00812078	99.6063	99.5791								545	0.000401614	0.000379079	0.000390347	e546	-11.2567	0.367429	M28	694				e398	546
344+3	0.000911177	0.011432	99.4718	99.3614								546	0.000401614	0.000379079	0.000390347	e547	-11.4805	0.367748	M29	695				e399	547
344-3	0.00110601	0.0139181	99.3999	99.411								547	0.000487855	0.000511686	0.000499771	e548	-10.9694	0.354243	M30	696				e400	548
345+3	0.000779736	0.00940176	99.5219	99.5084								548	0.000969662	0.000943569	0.000956616	e549	-11.6601	0.405164	M31	697				e401	549
345-3	0.000868623	0.0104785	99.6185	99.6108								549	0.00176465	0.00167309	0.00171887	e550	-12.8904	0.433169	M32	698				e402	550
346+3	0.000538456	0.0065793	99.6637	99.6433								550	0.00168865	0.00159859	0.00164362	e551	-13.0458	0.411447	M33	699				e403	551
346-3	0.000627671	0.00778508	99.6494	99.6599								551	0.000925819	0.000899393	0.000912606	e552	-13.1488	0.390618	M34	700				e404	552
347+3	0.000236994	0.00313519	99.8497	99.8499								552	0.000947797	0.000921377	0.000934587	e553	-12.9298	0.395319	M35	701				e405	553
347-3	0.000332498	0.00413736	99.8492	99.8401								553	0.000445626	0.000425025	0.000435326	e554	-12.3733	0.420901	M36	702				e406	554
348+3	0.000165137	0.00232296	99.8975	99.891								554	0.000881122	0.000855383	0.000868253	e555	-12.502	0.374645	M37	703				e407	555
348-3	0.000278733	0.00354371	99.8654	99.8641								555	0.00176465	0.00167309	0.00171887	e556	-13.1479	0.431783	M38	704				e408	556
349+3	0.000261462	0.00351356	99.8168	99.8501								556	0.00262759	0.00258191	0.00260475	e557	-12.8801	0.461362	M39	705				e409	557
349-3	0.000360858	0.00455028	99.8159	99.8144								557	0.00176465	0.00167309	0.00171887	e558	-12.6356	0.431619	M40	706				e410	558
35+3	0.000905883	0.00902995	99.5572	99.5484								558	0.00165062	0.00156138	0.001606	e559	-13.2262	0.395567	M41	707				e411	559
35-3	0.00098935	0.0102822	99.5348	99.518								559	0.000947797	0.000921377	0.000934587	e560	-12.9495	0.402766	M42	708				e412	560
350+3	0.000236994	0.00313519	99.8497	99.8499								560	0.000345938	0.000317942	0.00033194	e561	-9.15462	0.351526	M43	709				e413	561
350-3	0.000332498	0.00413736	99.8492	99.8401								561	0.000301831	0.000329202	0.000315517	e562	-9.84113	0.333009	M49	710				e414	562
351+3	0.000227867	0.003044	99.8498	99.8224								562	0.00153657	0.00144972	0.00149314	e563	-11.7937	0.369991	M50	711				e415	563
351-3	0.000346648	0.00472348	99.8518	99.8342								563	0.000925819	0.000899393	0.000912606	e564	-12.3825	0.385723	M51	712				e416	564
352+3	0.00027173	0.00359088	99.8266	99.8552								564	0.000429042	0.000406674	0.000417858	e565	-11.9987	0.396403	M52	713				e417	565
352-3	0.000371903	0.00461591	99.8165	99.8164								565	0.000429042	0.000406674	0.000417858	e566	-12.0597	0.401393	M53	714				e418	566
353+3	0.000232525	0.0030134	99.8529	99.8338								566	0.00055176	0.000575867	0.000563813	e567	-11.9084	0.399869	M54	715				e419	567
353-3	0.000289993	0.00372605	99.8626	99.8488								567	0.00168068	0.00171581	0.00169824	e568	-16.4826	0.579586	M55	716				e420	568
354+3	0.000261453	0.00352194	99.8288	99.8562								568	0.00114831	0.00117141	0.00115986	e569	-13.8964	0.423785	M56	717				e421	569
354-3	0.000360991	0.00456581	99.8164	99.8171								569	0.00114168	0.00115688	0.00114928	e570	-12.3982	0.371025	M57	718				e422	570
355+3	0.000242956	0.00330056	99.8502	99.8558								570	0.00143602	0.00144986	0.00144294	e571	-11.1862	0.38327	M58	719				e423	571
355-3	0.000334219	0.0042423	99.8287	99.8304								571	0.00174048	0.00173808	0.00173928	e572	-10.4611	0.368772	M59	720				e424	572
356+3	0.000239969	0.00322234	99.8506	99.8654								572	0.00106909	0.00109227	0.00108068	e573	-13.1182	0.394693	M60	721				e425	573
356-3	0.000336818	0.00420242	99.825	99.8363								573	0.00125442	0.00127686	0.00126564	e574	-15.3958	0.458238	M61	722				e426	574
357+3	0.00024053	0.00322522	99.8499	99.8652								574	0.00132097	0.00133344	0.00132721	e575	-13.5219	0.429459	M62	723				e427	575
357-3	0.000338076	0.00421799	99.8255	99.8363								575	0.00136205	0.00137698	0.00136951	e576	-11.8614	0.362044	M63	724				e428	576
358+3	0.000214709	0.00283608	99.8669	99.8452								576	0.00139916	0.00141335	0.00140625	e577	-12.3057	0.366	M64	725				e429	577
358-3	0.000256485	0.00332802	99.8599	99.8581								577	0.00174048	0.00173808	0.00173928	e578	-11.1775	0.371665	M65	726				e430	578
359+3	0.000303936	0.00385438	99.8328	99.7818								578	0.00126114	0.00127456	0.00126785	e579	-13.5819	0.410551	M66	727				e431	579
359-3	0.00034971	0.00434398	99.82	99.8167								579	0.00120153	0.00122411	0.00121282	e580	-13.3559	0.435301	M67	728				e432	580
36+3	0.000103627	0.00195185	99.9957	99.986								580	0.00138075	0.00139226	0.00138651	e581	-14.7607	0.452583	M68	729				e433	581
36-3	9.11471e-05	0.00133543	99.9766	99.9748								581	0.00154658	0.0015589	0.00155274	e582	-13.011	0.411542	M69	730				e434	582
360+3	0.000267068	0.0034122	99.8543	99.8524								582	0.00167974	0.00166788	0.00167381	e583	-12.5945	0.442381	M70	731				e435	583
360-3	0.000320395	0.00401172	99.8333	99.8093								583	0.00187646	0.0018737	0.00187508	e584	-12.6619	0.397792	M71	732				e436	584
361+3	0.000344717	0.00480891	99.8479	99.8629								584	0.00108191	0.00109797	0.00108994	e585	-11.7731	0.35109	M72	733				e437	585
361-3	0.000414762	0.00561807	99.7651	99.7789								585	0.00104275	0.0010659	0.00105433	e586	-12.6482	0.379349	M73	734				e438	586
362+3	0.000198289	0.00267666	99.8891	99.8838								586	0.00114175	0.00109638	0.00111907	e587	-12.7697	0.383501	M74	735				e439	587
362-3	0.0002772	0.00361994	99.8583	99.8292								587	0.00040541	0.000379348	0.000392379	e588	-6.7557	0.200917	B1	736				e440	588
363+3	0.000369597	0.00475938	99.81	99.7783								588	0.000388231	0.000362439	0.000375335	e589	-6.50645	0.193319	B2	737				e441	589
363-3	0.000380912	0.00449143	99.8202	99.8356								589	0.000474317	0.000520328	0.000497322	e590	-6.8512	0.237272	B3	738				e442	590
364+3	0.000394279	0.00479439	99.7961	99.7615								590	0.00284605	0.00327625	0.00306115	e591	-5.17465	0.258529	B4	739				e443	591
364-3	0.000342877	0.00462435	99.845	99.8149								591	0.00303746	0.00327625	0.00315686	e592	-5.00774	0.267988	B5	740				e444	592
365+3	0.000350582	0.0043185	99.8176	99.7913								592	0.00185562	0.00197278	0.0019142	e593	-5.32975	0.160453	B6	741				e445	593
365-3	0.000304135	0.0041974	99.8661	99.8431								593	0.00569804	0.00408152	0.00488978	e594	-4.76262	0.319325	B7	742				e446	594
366+3	0.000326098	0.00404579	99.8281	99.8038								594	0.00569804	0.00428551	0.00499178	e595	-4.8487	0.332023	B8	743				e447	595
366-3	0.000282475	0.00394249	99.8725	99.8532								595	0.00371926	0.00321959	0.00346942	e596	-6.6324	0.225227	B9	744				e448	596
367+3	0.000343246	0.00424106	99.8202	99.7951								596	0.00225892	0.00248383	0.00237138	e597	-6.6369	0.200178	B12	745				e449	597
367-3	0.00029725	0.00412331	99.867	99.8457								597	0.00378201	0.00438428	0.00408314	e598	-7.15535	0.346172	B13	746				e450	598
368+3	0.000367877	0.00450673	99.8107	99.7809								598	0.00706112	0.0046806	0.00587086	e599	-5.39419	0.381584	B14	747				e451	599
368-3	0.000319382	0.00437097	99.8583	99.8284								599	0.00488098	0.00387327	0.00437712	e600	-7.37715	0.290052	B15	748				e452	600
369+3	0.000385429	0.00469803	99.8062	99.7761								600	0.00245695	0.00274442	0.00260069	e601	-6.5993	0.223324	B18	749				e453	601
369-3	0.000334839	0.00453768	99.852	99.8181								601	0.0131216	0.00672496	0.00992328	e602	-5.07265	0.620107	B19	750				e454	602
37+3	0.000141056	0.00237126	99.9418	99.9204								602	0.000634059	0.00060459	0.000619325	e603	-9.76231	0.291334	B20	751				e455	603
37-3	0.00014607	0.00205574	99.9371	99.9393								603	0.000720521	0.000688562	0.000704541	e604	-9.06924	0.336041	B21	752				e456	604
370+3	0.000309455	0.00386466	99.839	99.8105								604	0.00059955	0.000570931	0.000585241	e605	-8.16492	0.269384	B22	753				e457	605
370-3	0.000270122	0.00380404	99.8816	99.8567								605	0.000491525	0.000537171	0.000514348	e606	-7.81942	0.25032	B23	754				e458	606
371+3	0.000309455	0.00386466	99.839	99.8105								606	0.000439833	0.000486605	0.000463219	e607	-7.16585	0.22192	B24	755				e459	607
371-3	0.000270122	0.00380404	99.8816	99.8567								607	0.000369283	0.000345537	0.00035741	e608	-6.06416	0.181648	B25	756				e460	608
372+3	0.000334793	0.0041492	99.8273	99.7999								608	0.000616799	0.000587771	0.000602285	e609	-8.89125	0.284689	B26	757				e461	609
372-3	0.000288806	0.00401037	99.8707	99.8494								609	0.000439833	0.000486605	0.000463219	e610	-7.56717	0.224881	B27	758				e462	610
373+3	0.000309455	0.00386466	99.839	99.8105								610	0.000755145	0.000722117	0.000738631	e611	-7.39591	0.358169	B28	759				e463	611
373-3	0.000270122	0.00380404	99.8816	99.8567								611	0.000422625	0.000396232	0.000409428	e612	-6.63447	0.210834	B29	760				e464	612
374+3	0.000317724	0.00395468	99.8348	99.8063								612	0.000737823	0.000705348	0.000721586	e613	-9.63034	0.352133	B30	761				e465	613
374-3	0.000276417	0.00387749	99.876	99.8546								613	0.000616799	0.000587771	0.000602285	e614	-8.06322	0.281055	B31	762				e466	614
375+3	0.00030124	0.0037751	99.8465	99.8203								614	0.000651339	0.000621405	0.000636372	e615	-7.7946	0.300728	B32	763				e467	615
375-3	0.000263238	0.00371261	99.887	99.8597								615	0.000474317	0.000520328	0.000497322	e616	-6.48485	0.240516	B33	764				e468	616
376+3	0.000309455	0.00386466	99.839	99.8105								616	0.000737823	0.000705348	0.000721586	e617	-10.5751	0.347117	B34	765				e469	617
376-3	0.000270122	0.00380404	99.8816	99.8567								617	0.00050877	0.00055402	0.000531395	e618	-8.61023	0.256022	B35	766				e470	618
377+3	0.00037664	0.00460231	99.81	99.7795								618	0.000491525	0.000537171	0.000514348	e619	-8.41286	0.250322	B36	767				e471	619
377-3	0.000327008	0.00445322	99.855	99.8227								619	0.000668587	0.000638189	0.000653388	e620	-7.29122	0.306332	B37	768				e472	620
378+3	0.00030124	0.0037751	99.8465	99.8203								620	0.00040541	0.000379348	0.000392379	e621	-6.68785	0.200171	B38	769				e473	621
378-3	0.000263238	0.00371261	99.887	99.8597								621	0.000824494	0.000789108	0.000806801	e622	-5.93222	0.396913	B39	770				e474	622
379+3	0.000367877	0.00450673	99.8107	99.7809								622	0.000703217	0.000671782	0.0006875	e623	-9.39556	0.334958	B40	771				e475	623
379-3	0.000319382	0.00437097	99.8583	99.8284								623	0.00050877	0.00055402	0.000531395	e624	-8.24255	0.25843	B41	772				e476	624
38+3	0.000166033	0.00263074	99.9241	99.9023								624	0.000422625	0.000396232	0.000409428	e625	-6.86548	0.209402	B42	773				e477	625
38-3	0.000187231	0.00248482	99.9079	99.914								625	0.000946063	0.000906011	0.000926037	e626	-9.56096	0.471774	B43	774				e478	626
380+3	0.000480693	0.00613805	99.7471	99.7063								626	0.000876566	0.000839271	0.000857919	e627	-9.03257	0.42912	B44	775				e479	627
380-3	0.000421512	0.00546379	99.7955	99.7688								627	0.000841847	0.000805841	0.000823844	e628	-8.59291	0.414321	B45	776				e480	628
381+3	0.000382779	0.00465847	99.8289	99.7988								628	0.000491525	0.000537171	0.000514348	e629	-8.06605	0.251963	B46	777				e481	629
381-3	0.00031658	0.00392343	99.8242	99.8352								629	0.000651339	0.000621405	0.000636372	e630	-9.28391	0.300584	B47	778				e482	630
382+3	0.000360363	0.00442498	99.8354	99.8108								630	0.000439833	0.000486605	0.000463219	e631	-7.24838	0.215378	B48	779				e483	631
382-3	0.000308894	0.0038411	99.8293	99.8403								631	0.00267141	0.00213842	0.00240491	e632	-9.33296	0.336578	B49	780				e484	632
383+3	0.000360363	0.00442498	99.8354	99.8108								632	0.00291881	0.00237332	0.00264606	e633	-8.41171	0.365689	B50	781				e485	633
383-3	0.000308894	0.0038411	99.8293	99.8403								633	0.00275346	0.00219294	0.0024732	e634	-8.16998	0.346643	B51	782				e486	634
384+3	0.0004048	0.00489241	99.8188	99.7865								634	0.000668587	0.000638189	0.000653388	e635	-8.29048	0.305991	B52	783				e487	635
384-3	0.000337912	0.00415014	99.8115	99.8399								635	0.000422625	0.000396232	0.000409428	e636	-5.79424	0.207662	B53	784				e488	636
385+3	0.000344576	0.00425361	99.8471	99.8315								636	0.000689439	0.000534575	0.000612007	e637	-7.79467	0.27037	X1	785				e489	637
385-3	0.000292314	0.00365941	99.8381	99.8521								637	0.000689439	0.000656418	0.000672928	e638	-6.28241	0.303576	X2	786				e490	638
386+3	0.000354391	0.00436045	99.8417	99.8214								638	0.000689439	0.000656418	0.000672928	e639	-7.40537	0.288771	X3	787				e491	639
386-3	0.000298003	0.00372152	99.8404	99.8517								639	0.00056354	0.000534575	0.000549057	e640	-5.86645	0.2306	X4	788				e492	640
387+3	0.000360363	0.00442498	99.8354	99.8108								640	0.00056354	0.000410962	0.000487251	e641	-5.69405	0.213808	X5	789				e493	641
387-3	0.000308894	0.0038411	99.8293	99.8403								641	0.00056354	0.000410962	0.000487251	e642	-6.67496	0.210229	X6	790				e494	642
388+3	0.000354391	0.00436045	99.8417	99.8214								642	0.000815661	0.000656418	0.000736039	e643	-7.78635	0.340402	X7	791				e495	643
388-3	0.000298003	0.00372152	99.8404	99.8517								643	0.00043797	0.000410962	0.000424466	e644	-5.63592	0.183197	X8	792				e496	644
389+3	0.000440909	0.0052994	99.7999	99.7714								644	0.000689439	0.000534575	0.000612007	e645	-6.407	0.264369	X9	793				e497	645
389-3	0.00035422	0.00432919	99.8124	99.8311								645	0.000689439	0.000534575	0.000612007	e646	-6.33792	0.271213	X10	794				e498	646
39+3	0	0	100	100								646	0.000689439	0.000656418	0.000672928	e647	-6.17814	0.308086	X11	795				e499	647
39-3	0	0	100	100								647	0.000689439	0.000534575	0.000612007	e648	-6.49504	0.283626	X12	796				e500	648
390+3	0.00043737	0.00528186	99.7996	99.766								648	0.00056354	0.000410962	0.000487251	e649	-5.63805	0.210534	X13	797				e501	649
390-3	0.00035323	0.00433252	99.7977	99.7956								649	0.00056354	0.000534575	0.000549057	e650	-5.43075	0.230151	X14	798				e502	650
391+3	0.000360363	0.00442498	99.8354	99.8108								650	0.000689439	0.000534575	0.000612007	e651	-6.07679	0.263977	X15	799				e503	651
391-3	0.000308894	0.0038411	99.8293	99.8403								651	0.000689439	0.000534575	0.000612007	e652	-6.21673	0.279851	X16	800				e504	652
392+3	0.000381704	0.00493219	99.7767	99.7518								652	0.00043797	0.000287515	0.000362742	e653	-5.12249	0.155678	X17	801				e505	653
392-3	0.000391687	0.00513004	99.8675	99.8434								653	0.00056354	0.000534575	0.000549057	e654	-5.66295	0.233878	X18	802				e506	654
393+3	0.000316872	0.0044731	99.8624	99.8631								654	0.00247645	0.00269179	0.00258412	e655	-4.29982	0.150663	R1	1				e507	655
393-3	0.000373991	0.00511199	99.8116	99.8094								655	0.00368007	0.00312379	0.00340193	e656	-4.0978	0.261675	R3	2				e508	656
394+3	0.00042685	0.005637	99.8016	99.8072								656	0.00349779	0.00358744	0.00354261	e657	-5.00195	0.346572	R4	3				e509	657
394-3	0.000475614	0.00616677	99.8122	99.7362								657	0.00758494	0.00747712	0.00753103	e658	-4.54966	0.152919	R5	4				e510	658
395+3	0.000496413	0.00611051	99.7463	99.7227								658	0.0029593	0.00252574	0.00274252	e659	-8.48033	0.320967	R6	5				e511	659
395-3	0.000655233	0.00786542	99.6712	99.6705								659	0.00590302	0.00668659	0.00629481	e660	-5.37429	0.222844	R8	6				e512	660
396+3	0.00042348	0.00563311	99.8145	99.7874								660	0.000370079	0.000337658	0.000353868	e661	-5.9038	0.244019	R9	7				e513	661
396-3	0.000378847	0.00520091	99.791	99.7856								661	0.00073532	0.000694006	0.000714663	e662	-5.3226	0.170493	R12	8				e514	662
397+3	0.000588675	0.0077004	99.6719	99.6763								662	0.00416903	0.00351692	0.00384298	e663	-8.5008	0.45287	R14	9				e515	663
397-3	0.000651444	0.00851238	99.6516	99.6323								663	0.00479131	0.0056193	0.00520531	e664	-9.90191	0.553711	R15	10				e516	664
398+3	0.000432219	0.00581975	99.7714	99.7161								664	0.00579568	0.0061512	0.00597344	e665	-11.2151	0.608919	R18	11				e517	665
398-3	0.000472287	0.00633819	99.7408	99.707								665	0.00310614	0.00318215	0.00314415	e666	-7.8587	0.330737	R19	12				e518	666
399+3	0.000329101	0.0045483	99.8411	99.8386								666	0.00977824	0.0088636	0.00932092	e667	-4.63349	0.196101	R20	13				e519	667
399-3	0.000365601	0.00497336	99.8203	99.815								667	0.00511613	0.00608338	0.00559975	e668	-10.6	0.491801	R21	14				e520	668
4+3	0.000551653	0.00623825	99.7442	99.7998								668	0.00613621	0.00675187	0.00644404	e669	-9.05607	0.444148	R22	15				e521	669
4-3	0.000738262	0.00772571	99.6845	99.6488								669	0.00162827	0.00120187	0.00141507	e670	-4.21619	0.217066	R24	16				e522	670
40+3	0	0	100	100								670	0.00246019	0.00264634	0.00255326	e671	-9.30795	0.469032	R25	17				e523	671
40-3	0	0	100	100								671	0.0020261	0.00158861	0.00180736	e672	-5.27091	0.158998	R26	18				e524	672
400+3	0.000312502	0.00441336	99.8624	99.8677								672	0.00173977	0.00151911	0.00162944	e673	-6.17337	0.195499	R27	19				e525	673
400-3	0.000364155	0.00496546	99.8156	99.8099								673	0.00172077	0.00176895	0.00174486	e674	-6.46755	0.201227	R28	20				e526	674
401+3	0.000371049	0.00514554	99.8072	99.8049								674	0.00201308	0.0019045	0.00195879	e675	-4.66583	0.141131	R29	21				e527	675
401-3	0.000427172	0.00581421	99.775	99.7559								675	0.00118216	0.00120939	0.00119578	e676	-4.30606	0.146551	R30	22				e528	676
402+3	0.000408474	0.0055785	99.821	99.8049								676	0.00121746	0.00138305	0.00130026	e677	-5.54779	0.176838	R31	23				e529	677
402-3	0.000453489	0.00606554	99.7407	99.738								677	0.003484	0.00387891	0.00368146	e678	-4.73012	0.141952	R32	24				e530	678
403+3	0.000509492	0.00625913	99.731	99.7151								678	0.00414638	0.00399763	0.00407201	e679	-10.1858	0.46108	R33	25				e531	679
403-3	0.000679857	0.0081627	99.649	99.6452								679	0.00203147	0.00215243	0.00209195	e680	-6.57487	0.197093	R34	26				e532	680
404+3	0.000352318	0.00429313	99.8077	99.8168								680	0.00235108	0.00246503	0.00240806	e681	-6.4931	0.192984	R35	27				e533	681
404-3	0.000418097	0.00496678	99.7841	99.7433								681	0.00307061	0.00321682	0.00314372	e682	-7.89424	0.267097	R36	28				e534	682
405+3	0.00042572	0.00557484	99.8114	99.7805								682	0.00233415	0.00247291	0.00240353	e683	-7.2354	0.222224	R37	29				e535	683
405-3	0.000352593	0.00483056	99.8114	99.8176								683	0.00282621	0.0022843	0.00255526	e684	-7.10965	0.22641	R38	30				e536	684
406+3	0.000246488	0.00318407	99.8696	99.9005								684	0.00271746	0.00274547	0.00273146	e685	-6.7213	0.218634	R39	31				e537	685
406-3	0.000293216	0.00409475	99.8734	99.8367								685	0.00382007	0.00403108	0.00392558	e686	-8.55551	0.400154	R40	32				e538	686
407+3	0.000235251	0.00298864	99.8728	99.8813								686	0.00381507	0.00377662	0.00379584	e687	-7.44253	0.329466	R41	33				e539	687
407-3	0.00026215	0.00338325	99.8701	99.8494								687	0.00408689	0.00424472	0.0041658	e688	-9.16529	0.411959	R42	34				e540	688
408+3	0.000235251	0.00298864	99.8728	99.8813								688	0.00327481	0.00354507	0.00340994	e689	-8.4198	0.345776	R43	35				e541	689
408-3	0.00026215	0.00338325	99.8701	99.8494								689	0.00305901	0.00282516	0.00294209	e690	-7.34142	0.218121	R44	36				e542	690
409+3	0.000242718	0.00313473	99.8741	99.8856								690	0.0022948	0.00277757	0.00253618	e691	-7.64988	0.243668	R45	37				e543	691
409-3	0.000295561	0.00410427	99.8496	99.837								691	0.00344186	0.00340802	0.00342494	e692	-10.0931	0.33831	R46	38				e544	692
41+3	0.0146438	0.149957	91.6753	91.7663								692	0.00265204	0.00228642	0.00246923	e693	-6.04894	0.240449	R47	39				e545	693
41-3	0.00928699	0.100908	94.3244	94.6072								693	0.00320534	0.0030328	0.00311907	e694	-5.99123	0.25959	R48	40				e546	694
410+3	0.000455791	0.00607607	99.7773	99.7177								694	0.0030522	0.00282718	0.00293969	e695	-6.86229	0.210908	R49	41				e547	695
410-3	0.000447223	0.00602844	99.7905	99.7758								695	0.00387132	0.00416364	0.00401748	e696	-11.1427	0.467728	R50	42				e548	696
411+3	0.000246488	0.00318407	99.8696	99.9005								696	0.00256642	0.00201241	0.00228941	e697	-7.16754	0.213957	R51	43				e549	697
411-3	0.000293216	0.00409475	99.8734	99.8367								697	0.00227607	0.00266465	0.00247036	e698	-7.22075	0.233924	R52	44				e550	698
412+3	0.000502784	0.00648029	99.7576	99.7756								698	0.00330586	0.00377283	0.00353935	e699	-10.1807	0.372597	R53	45				e551	699
412-3	0.000505009	0.00655758	99.782	99.7131								699	0.00317402	0.00335661	0.00326531	e700	-9.71606	0.3219	R54	46				e552	700
413+3	0.00058794	0.00737099	99.7438	99.7244								700	0.00218546	0.00187012	0.00202779	e701	-6.50195	0.23777	R55	47				e553	701
413-3	0.000575189	0.00726353	99.6897	99.6898								701	0.00208749	0.00209061	0.00208905	e702	-7.1745	0.214101	R56	48				e554	702
414+3	0.000491775	0.00636775	99.7611	99.776								702	0.00232499	0.0023291	0.00232704	e703	-7.14705	0.234203	R57	49				e555	703
414-3	0.000486417	0.00633553	99.7947	99.7268								703	0.00243171	0.00271039	0.00257105	e704	-6.18765	0.183893	R58	50				e556	704
415+3	0.000539051	0.00703525	99.7541	99.7454								704	0.0023891	0.0023111	0.0023501	e705	-6.2602	0.209397	R59	51				e557	705
415-3	0.000545954	0.00712942	99.6653	99.6732								705	0.00236011	0.00209106	0.00222558	e706	-9.3873	0.282984	R60	52				e558	706
416+3	0.000323726	0.00407672	99.8136	99.821								706	0.00213168	0.00209653	0.0021141	e707	-8.75835	0.260277	R61	53				e559	707
416-3	0.000297378	0.00374573	99.8457	99.788								707	0.00192546	0.0017327	0.00182908	e708	-6.8933	0.210789	R62	54				e560	708
417+3	0.000426924	0.00519384	99.7917	99.8003								708	0.00192546	0.0017327	0.00182908	e709	-7.06435	0.20984	R63	55				e561	709
417-3	0.000443278	0.00580589	99.8077	99.7396								709	0.00261817	0.00226841	0.00244329	e710	-7.0775	0.23507	R64	56				e562	710
418+3	0.000351164	0.00472193	99.841	99.8181								710	0.00222213	0.00237676	0.00229944	e711	-7.0948	0.211775	R65	57				e563	711
418-3	0.000268067	0.00386569	99.8813	99.8871								711	0.00247645	0.00269179	0.00258412	e712	-5.0008	0.151722	R67	58				e564	712
419+3	0.000307344	0.00389175	99.8431	99.8389								712	0.00313157	0.0040714	0.00360149	e713	-3.8181	0.278712	R68	59				e565	713
419-3	0.000252059	0.0032823	99.8897	99.8616								713	0.00552521	0.00626114	0.00589318	e714	-8.17205	0.371885	R70	60				e566	714
42+3	0.00559851	0.0589605	96.8959	96.8746								714	0.00319287	0.00305375	0.00312331	e715	-8.01265	0.369275	R71	61				e567	715
42-3	0.00459319	0.0497727	97.243	97.305								715	0.00622873	0.00687583	0.00655228	e716	-11.3147	0.558215	R72	62				e568	716
420+3	0.000266746	0.00343782	99.8778	99.848								716	0.00672371	0.00993828	0.008331	e717	-8.12336	0.374286	R73	63				e569	717
420-3	0.000253774	0.00322586	99.8705	99.8676								717	0.00214146	0.00205459	0.00209802	e718	-6.82488	0.214946	R74	64				e570	718
421+3	0.000290864	0.00369464	99.8739	99.8555								718	0.00226353	0.00205143	0.00215748	e719	-6.44198	0.222044	R75	65				e571	719
421-3	0.000230383	0.00301346	99.8957	99.8577								719	0.0063635	0.00747097	0.00691724	e720	-10.4268	0.56344	R76	66				e572	720
422+3	0.000453764	0.00613255	99.7781	99.7763								720	0	0	0	e721	-5.41886	0.23543	R78	67				e573	721
422-3	0.000499304	0.00662859	99.6957	99.7055								721	0.00229131	0.00207616	0.00218374	e722	-6.80591	0.284711	R79	68				e574	722
423+3	0.000639619	0.00811946	99.6736	99.6571								722	0	0	0	e723	-11.182	0.396676	R80	69				e575	723
423-3	0.0006845	0.00870571	99.6714	99.6687								723	0.00170607	0.00175058	0.00172833	e724	-6.94181	0.301236	R81	70				e576	724
424+3	0.000302253	0.00382621	99.8441	99.8344								724	0	0	0	e725	-7.10534	0.259964	R82	71				e577	725
424-3	0.000295826	0.004123	99.8747	99.8614								725	0.00225633	0.00179638	0.00202636	e726	-6.44876	0.337908	R83	72				e578	726
425+3	0.000291159	0.00370524	99.8491	99.8273								726	0.00175632	0.00134059	0.00154846	e727	-8.36474	0.249645	R84	73				e579	727
425-3	0.000287565	0.00403383	99.8773	99.8654								727	0.00183071	0.00168436	0.00175753	e728	-9.22997	0.286497	R85	74				e580	728
426+3	0.000212606	0.00272122	99.9017	99.8909								728	0.00185424	0.0016378	0.00174602	e729	-6.0465	0.323982	R86	75				e581	729
426-3	0.000185974	0.0025312	99.9234	99.9025								729	0.00442099	0.00305286	0.00373692	e730	-8.21023	0.250827	R87	76				e582	730
427+3	0.000350011	0.00425689	99.824	99.7962								730	0.00159336	0.00150717	0.00155026	e731	-4.03801	0.126594	R88	77				e583	731
427-3	0.00029893	0.00412901	99.8643	99.8536								731	0.00187639	0.00174497	0.00181068	e732	-5.97111	0.180933	R89	78				e584	732
428+3	0.000360589	0.00437233	99.8143	99.7822								732	0.00256648	0.00260749	0.00258698	e733	-6.53805	0.323641	R90	79				e585	733
428-3	0.000312761	0.00428137	99.8562	99.8418								733	0.00285241	0.00300168	0.00292705	e734	-7.85663	0.307403	R91	80				e586	734
429+3	0.000603145	0.00741684	99.6672	99.6338								734	0.00369716	0.00444997	0.00407357	e735	-7.45664	0.269523	R93	81				e587	735
429-3	0.000532459	0.00665019	99.739	99.7167								735	0.00319931	0.0022104	0.00270485	e736	-4.40869	0.136778	R94	82				e588	736
43+3	0.000534575	0.00562078	99.7805	99.7462								736	0.0124136	0.0219893	0.0172015	e737	-12.3387	0.581232	R95	83				e589	737
43-3	0.00056354	0.00631466	99.7908	99.7751								737	0.000142824	0.000175697	0.00015926	e738	-7.72581	0.286359	R96	84				e590	738
430+3	0.000580411	0.00717025	99.6854	99.6521								738	0.000235754	0.000254857	0.000245305	e739	-5.10684	0.156821	R97	85				e591	739
430-3	0.000505539	0.00635913	99.7493	99.7341								739	0	0	0	e740	-8.76719	0.28785	R98	86				e592	740
431+3	0.000228272	0.00293252	99.8944	99.89								740	0.00237715	0.00208941	0.00223328	e741	-7.9307	0.249867	R99	87				e593	741
431-3	0.000198734	0.00265871	99.9114	99.8918								741	0.00325422	0.00337258	0.0033134	e742	-7.32299	0.247205	R100	88				e594	742
432+3	0.00021783	0.00280211	99.9012	99.8915								742	0.00232011	0.00199023	0.00215517	e743	-9.167	0.272587	R101	89				e595	743
432-3	0.000182553	0.00250563	99.9175	99.9012								743	0.00159433	0.00174881	0.00167157	e744	-8.29858	0.266405	R102	90				e596	744
433+3	0.000184783	0.00248644	99.9213	99.9032								744	0.00301294	0.00312041	0.00306668	e745	-13.2587	0.528923	R103	91				e597	745
433-3	0.000157288	0.0022237	99.928	99.9089								745	0.00173309	0.00133264	0.00153287	e746	-7.81869	0.239321	R106	92				e598	746
434+3	0.000160774	0.00224128	99.9362	99.9163								746	0.00181056	0.00157625	0.0016934	e747	-5.70721	0.255317	R107	93				e599	747
434-3	0.000147236	0.00212949	99.9593	99.9219								747	0.00296964	0.00295443	0.00296204	e748	-7.38615	0.240287	R108	94				e600	748
435+3	0.000155106	0.00217883	99.9442	99.9286								748	0.0107806	0.0112099	0.0109952	e749	-8.49517	0.361958	R109	95				e601	749
435-3	0.000144962	0.00210124	99.9595	99.9225								749	0.00148028	0.00156818	0.00152423	e750	-9.69389	0.288	R110	96				e602	750
436+3	0.000205015	0.00269687	99.9065	99.902								750	0.00141721	0.00165006	0.00153363	e751	-7.62377	0.305714	R112	97				e603	751
436-3	0.000176313	0.00240845	99.9289	99.9068								751	0.00347592	0.00292	0.00319796	e752	-3.65966	0.113275	R113	98				e604	752
437+3	0.000205015	0.00269687	99.9065	99.902								752	0.00292389	0.00323679	0.00308034	e753	-4.95644	0.154717	R114	99				e605	753
437-3	0.000176313	0.00240845	99.9289	99.9068								753	0.00293673	0.00215423	0.00254548	e754	-5.06005	0.157767	R115	100				e606	754
438+3	0.000221861	0.00283356	99.886	99.8522								754	0.00280302	0.00277262	0.00278782	e755	-6.16907	0.215515	R116	101				e607	755
438-3	0.000212957	0.00322166	99.9139	99.9349								755	0.00320595	0.00265777	0.00293186	e756	-6.13099	0.228614	R117	102				e608	756
439+3	0.000205015	0.00269687	99.9065	99.902								756	0.00238548	0.00246766	0.00242657	e757	-6.57885	0.215254	R118	103				e609	757
439-3	0.000176313	0.00240845	99.9289	99.9068								757	0.00395564	0.0045583	0.00425697	e758	-9.83235	0.461304	R119	104				e610	758
44+3	0.00157174	0.015582	99.3594	99.3167								758	0.00287415	0.00236845	0.0026213	e759	-6.99392	0.251033	R120	105				e611	759
44-3	0.00165305	0.0167958	99.3165	99.3469								759	0.00282486	0.00208711	0.00245598	e760	-7.25941	0.265867	R121	106				e612	760
440+3	0.00082758	0.00985016	99.5781	99.501								760	0.00685676	0.0078208	0.00733878	e761	-10.8724	0.60451	R122	107				e613	761
440-3	0.000846069	0.0101326	99.5844	99.5837								761	0.00385334	0.00492275	0.00438805	e762	-10.9243	0.635349	R123	108				e614	762
441+3	0.000288537	0.00360503	99.8711	99.8452								762	0.00348676	0.00355699	0.00352187	e763	-11.3941	0.526093	R124	109				e615	763
441-3	0.000247287	0.00322662	99.899	99.8852								763	0.00243157	0.00248644	0.00245901	e764	-8.77291	0.434187	R125	110				e616	764
442+3	0.000270314	0.00336816	99.8628	99.8229								764	0.0020498	0.00238871	0.00221925	e765	-7.5586	0.245921	R126	111				e617	765
442-3	0.000214324	0.00324011	99.9146	99.927								765	0.00352788	0.00369719	0.00361254	e766	-10.7735	0.543056	R127	112				e618	766
443+3	0.000320687	0.00389607	99.8438	99.7946								766	0.00276062	0.00294329	0.00285195	e767	-7.6831	0.344736	R128	113				e619	767
443-3	0.00028619	0.00394313	99.8797	99.882								767	0.00269045	0.00235722	0.00252384	e768	-7.17987	0.266994	R129	114				e620	768
444+3	0.000218691	0.00279369	99.8904	99.8602								768	0.00270746	0.00280811	0.00275779	e769	-6.85264	0.251353	R130	115				e621	769
444-3	0.000191026	0.00259808	99.9101	99.9225								769	0.00315519	0.00244592	0.00280055	e770	-4.95673	0.17216	R131	116				e622	770
445+3	0.000239786	0.00308214	99.8927	99.8674								770	0.00391839	0.00356074	0.00373957	e771	-9.53021	0.449544	R132	117				e623	771
445-3	0.000224792	0.00297497	99.9018	99.8918								771	0.00286877	0.00214984	0.0025093	e772	-7.91957	0.333976	R133	118				e624	772
446+3	0.000269311	0.00335697	99.8623	99.8227								772	0.00264226	0.00236416	0.00250321	e773	-7.50073	0.295184	R134	119				e625	773
446-3	0.000213815	0.00323343	99.9168	99.9298								773	0.00229475	0.00263479	0.00246477	e774	-9.05838	0.337612	R135	120				e626	774
447+3	0.000205015	0.00269687	99.9065	99.902								774	0.00293968	0.00268201	0.00281085	e775	-9.7006	0.345188	R136	121				e627	775
447-3	0.000176313	0.00240845	99.9289	99.9068								775	0.0029724	0.00282901	0.0029007	e776	-8.62021	0.353288	R137	122				e628	776
448+3	0.000270314	0.00336816	99.8628	99.8229								776	0.00322941	0.00330235	0.00326588	e777	-10.6447	0.378193	R138	123				e629	777
448-3	0.000214324	0.00324011	99.9146	99.927								777	0.00749425	0.00741605	0.00745515	e778	-12.3186	0.648557	R139	124				e630	778
449+3	0.000230511	0.00296904	99.8939	99.8889								778	0.00553847	0.00542163	0.00548005	e779	-12.1028	0.594704	R140	125				e631	779
449-3	0.000200266	0.00267785	99.9097	99.8922								779	0.00361723	0.00385783	0.00373753	e780	-10.1981	0.496124	R141	126				e632	780
45+3	0.00127951	0.0141666	99.4022	99.4538								780	0.00535846	0.00551544	0.00543695	e781	-11.0872	0.499898	R142	127				e633	781
45-3	0.00139209	0.0154136	99.2328	99.2333								781	0.00401616	0.00409449	0.00405533	e782	-10.7966	0.498488	R143	128				e634	782
450+3	0.000291328	0.00363697	99.8595	99.8098								782	0.00346093	0.00339902	0.00342998	e783	-10.1889	0.487938	R144	129				e635	783
450-3	0.000235863	0.00306296	99.88	99.8881								783	0.00540515	0.00548982	0.00544749	e784	-11.0165	0.57142	R145	130				e636	784
451+3	0.000393188	0.00473266	99.8186	99.7835								784	0.00261367	0.00266677	0.00264022	e785	-6.71133	0.23319	R146	131				e637	785
451-3	0.000276727	0.00348876	99.873	99.8591								785	0.00864406	0.0083014	0.00847273	e786	-12.6873	0.62682	R147	132				e638	786
452+3	0.000270314	0.00336816	99.8628	99.8229								786	0.000993354	0.00119965	0.0010965	e787	-7.0099	0.271278	R148	133				e639	787
452-3	0.000214324	0.00324011	99.9146	99.927								787	0.000995578	0.00120238	0.00109898	e788	-7.71472	0.276315	R150	134				e640	788
453+3	0.00021783	0.00280211	99.9012	99.8915								788	0.000993354	0.00119965	0.0010965	e789	-7.68066	0.272227	R151	135				e641	789
453-3	0.000182553	0.00250563	99.9175	99.9012								789	0.00149613	0.0015797	0.00153791	e790	-14.5918	0.797793	R156	136				e642	790
454+3	0.00026114	0.00327057	99.8947	99.8671								790	0.00613356	0.00795069	0.00704212	e791	-10.9145	0.586411	R157	137				e643	791
454-3	0.000245486	0.00318994	99.8967	99.8801								791	0.00215075	0.00253149	0.00234112	e792	-10.8223	0.492506	R158	138				e644	792
455+3	0.000269311	0.00335697	99.8623	99.8227								792	0.00101472	0.00103691	0.00102582	e793	-18.1538	1.0267	R159	139				e645	793
455-3	0.000213815	0.00323343	99.9168	99.9298								793	0.00399799	0.00396109	0.00397954	e794	-15.3146	0.733239	R160	140				e646	794
456+3	0.000230511	0.00296904	99.8939	99.8889								794	0.00160762	0.0022598	0.00193371	e795	-15.2646	0.844987	R161	141				e647	795
456-3	0.000200266	0.00267785	99.9097	99.8922								795	0.00872014	0.0108923	0.00980622	e796	-13.761	0.706383	R162	142				e648	796
457+3	0.000363941	0.00444988	99.8341	99.8026								796	0.00198948	0.00229286	0.00214117	e797	-10.8385	0.456893	R163	143				e649	797
457-3	0.000260719	0.0032663	99.8969	99.8637								797	0.000431746	0.000463523	0.000447634	e798	-8.05025	0.318348	R166	144				e650	798
458+3	0.000239786	0.00308214	99.8927	99.8674								798	0.000580259	0.000512698	0.000546478	e799	-10.6042	0.316213	R168	145				e651	799
458-3	0.000224792	0.00297497	99.9018	99.8918								799	0.00145605	0.00161147	0.00153376	e800	-7.81473	0.235322	R169	146				e652	800
459+3	0.000293271	0.00362759	99.8508	99.8037								800	0.0073888	0.00683591	0.00711235	e801	-5.9	0.316228	R170	147				e653	801
459-3	0.00022328	0.0033186	99.9131	99.9172								801	0.00199022	0.00185551	0.00192287	e802	-7.65985	0.238345	R171	148				e654	802
46+3	0.000944377	0.0106915	99.5718	99.5942
46-3	0.00100255	0.0113381	99.4561	99.4413
460+3	0.000299666	0.00373238	99.8589	99.805
460-3	0.000236674	0.00307136	99.88	99.8872
461+3	0.000293271	0.00362759	99.8508	99.8037
461-3	0.00022328	0.0033186	99.9131	99.9172
462+3	0.000342436	0.00413942	99.8027	99.7601
462-3	0.000336849	0.00452756	99.8578	99.8468
463+3	0.000293484	0.0036354	99.8288	99.783
463-3	0.000283567	0.00397454	99.8719	99.8803
464+3	0.000593346	0.00688456	99.6535	99.6167
464-3	0.000510949	0.00596501	99.753	99.7183
465+3	0.000313553	0.003835	99.8179	99.7759
465-3	0.000335227	0.00451033	99.8578	99.8468
466+3	0.000343283	0.00415443	99.7904	99.7723
466-3	0.000347422	0.00427776	99.8115	99.8233
467+3	0.00022114	0.00282441	99.8878	99.8537
467-3	0.000212441	0.00321622	99.9127	99.9349
468+3	0.000441607	0.00524846	99.7948	99.7595
468-3	0.000361491	0.00439115	99.8162	99.798
469+3	0.00022114	0.00282441	99.8878	99.8537
469-3	0.000212441	0.00321622	99.9127	99.9349
47+3	0.000578749	0.00649012	99.774	99.7245
47-3	0.000589155	0.00706626	99.6914	99.6963
470+3	0.000484786	0.00573917	99.7109	99.6762
470-3	0.000400708	0.00482301	99.807	99.7553
471+3	0.000391531	0.00471481	99.8205	99.7874
471-3	0.000273647	0.00345814	99.8722	99.8589
472+3	0.000394876	0.00475086	99.8181	99.7819
472-3	0.000280807	0.00352914	99.8715	99.8602
473+3	0.000282538	0.00351181	99.8425	99.8043
473-3	0.000282088	0.00395941	99.8732	99.8807
474+3	0.000441607	0.00524846	99.7948	99.7595
474-3	0.000361491	0.00439115	99.8162	99.798
475+3	0.000414962	0.00497476	99.7888	99.7542
475-3	0.000367309	0.00444344	99.8216	99.7849
476+3	0.000272933	0.00340872	99.8504	99.8143
476-3	0.000277462	0.00391367	99.8708	99.8854
477+3	0.00043384	0.00516814	99.7999	99.7649
477-3	0.000344544	0.00420466	99.831	99.8196
478+3	0.000276325	0.00344386	99.8474	99.8082
478-3	0.000279287	0.00393173	99.8721	99.8824
479+3	0.000345477	0.00417571	99.8	99.7539
479-3	0.000345647	0.00460982	99.8551	99.842
48+3	0.00130685	0.0136655	99.4841	99.4783
48-3	0.00139542	0.0144421	99.416	99.4399
480+3	0.000297106	0.00367382	99.8522	99.8016
480-3	0.000245565	0.00352824	99.9123	99.912
481+3	0.000271863	0.00339777	99.8512	99.8164
481-3	0.000276907	0.00390832	99.8708	99.8854
482+3	0.000276325	0.00344386	99.8474	99.8082
482-3	0.000279287	0.00393173	99.8721	99.8824
483+3	0.00029845	0.00367902	99.8496	99.8028
483-3	0.00023091	0.00338507	99.9121	99.9158
484+3	0.000300408	0.00370057	99.8498	99.8012
484-3	0.000231533	0.0033929	99.9139	99.9135
485+3	0.000313132	0.00422811	99.8318	99.7873
485-3	0.000282827	0.00396706	99.8732	99.8803
486+3	0.000320209	0.00430516	99.834	99.7968
486-3	0.000319635	0.00436493	99.8622	99.8783
487+3	0.000293271	0.00362759	99.8508	99.8037
487-3	0.00022328	0.0033186	99.9131	99.9172
488+3	0.000334231	0.00402657	99.8394	99.7888
488-3	0.000263042	0.00370599	99.8926	99.8804
489+3	0.00034075	0.00409142	99.8331	99.7939
489-3	0.000303449	0.00413206	99.8673	99.8667
49+3	0.00103446	0.0116253	99.5092	99.5532
49-3	0.00110494	0.0124099	99.4131	99.3733
490+3	0.000334231	0.00402657	99.8394	99.7888
490-3	0.000263042	0.00370599	99.8926	99.8804
491+3	0.000315109	0.00384115	99.8541	99.8005
491-3	0.0002588	0.0036559	99.8945	99.8831
492+3	0.000334231	0.00402657	99.8394	99.7888
492-3	0.000263042	0.00370599	99.8926	99.8804
493+3	0.000417425	0.00532022	99.7824	99.7299
493-3	0.000372844	0.00489886	99.8288	99.8551
494+3	0.000420589	0.00535553	99.7853	99.7315
494-3	0.000374784	0.0049214	99.8254	99.8542
495+3	9.6656e-05	0.00152995	99.9413	99.9276
495-3	0.000102139	0.00159889	99.9433	99.9623
496+3	0.000235279	0.00335412	99.8975	99.865
496-3	0.000219985	0.00280423	99.908	99.9121
497+3	0.000161288	0.00285695	99.9215	99.9146
497-3	0.000145632	0.00229899	99.9372	99.9454
498+3	7.50557e-05	0.00126625	99.9569	99.9417
498-3	5.15214e-05	0.00062779	99.9767	99.9831
499+3	0.000101311	0.00158456	99.9404	99.927
499-3	0.000110876	0.00170617	99.9411	99.9586
5+3	0.00018989	0.00293368	99.9036	99.9324
5-3	0.000226282	0.00294751	99.9135	99.894
50+3	0.000532903	0.00601366	99.7996	99.7569
50-3	0.000538238	0.00653739	99.7245	99.7341
500+3	8.43432e-05	0.00137932	99.9521	99.9344
500-3	8.87833e-05	0.0014359	99.9481	99.9647
501+3	0.000293776	0.00454486	99.8553	99.843
501-3	0.000311376	0.00472218	99.861	99.846
502+3	0.000205429	0.00303866	99.9003	99.8765
502-3	0.00023046	0.0035931	99.9056	99.8854
503+3	0.00027997	0.00435777	99.8644	99.8492
503-3	0.000304758	0.00463446	99.8621	99.848
504+3	0.0002444	0.00396424	99.9104	99.8905
504-3	0.000287172	0.00418455	99.8064	99.8344
505+3	7.38987e-05	0.00120186	99.9617	99.9475
505-3	6.70998e-05	0.000844749	99.9561	99.9363
506+3	0.00056297	0.00742162	99.7192	99.6919
506-3	0.000614062	0.0078818	99.669	99.6847
507+3	9.79216e-05	0.00151621	99.9527	99.9501
507-3	0.000118935	0.00175767	99.9633	99.9809
508+3	0.000174603	0.00229775	99.9145	99.8813
508-3	0.000323761	0.004329	99.826	99.8056
509+3	0.00010324	0.00217394	99.9383	99.9383
509-3	0.000143059	0.00281584	99.9283	99.9293
51+3	6.12315e-05	0.00114019	99.9889	99.9954
51-3	4.13686e-05	0.000485892	99.992	99.9922
510+3	4.73377e-06	6.37035e-05	99.999	99.9985
510-3	1.45627e-05	0.000196304	99.9861	99.9885
511+3	5.14234e-06	7.3614e-05	99.9987	99.9978
511-3	2.08471e-05	0.000298095	99.9904	99.9928
512+3	4.5676e-06	5.81725e-05	99.9975	99.9994
512-3	7.6372e-06	0.000104607	99.9953	99.9977
513+3	0.000277008	0.0043273	99.9086	99.9197
513-3	0.000289506	0.00414019	99.8864	99.8654
514+3	3.59686e-07	5.76505e-06	100	99.9987
514-3	1.64728e-06	2.64548e-05	99.9996	99.9995
515+3	0.000783629	0.0101123	99.6794	99.5766
515-3	0.00124107	0.0150739	99.2867	99.3254
516+3	2.62308e-07	3.80564e-06	100	100
516-3	1.12267e-06	1.62355e-05	100	100
517+3	0.000390866	0.0058003	99.7268	99.7447
517-3	0.000608918	0.00822877	99.6005	99.6043
518+3	0.000436857	0.00543706	99.74	99.7374
518-3	0.00046046	0.00607033	99.7595	99.7515
519+3	0.00017636	0.00240469	99.9188	99.9152
519-3	0.000200755	0.00307069	99.9262	99.9259
52+3	0.000578749	0.00649012	99.774	99.7245
52-3	0.000589155	0.00706626	99.6914	99.6963
520+3	0.000268559	0.00339574	99.8684	99.855
520-3	0.000291866	0.00403771	99.8705	99.8731
521+3	0.000203848	0.00269856	99.9063	99.8983
521-3	0.000228179	0.0033631	99.9093	99.9125
522+3	0.000370686	0.00468995	99.7897	99.7665
522-3	0.000394011	0.00532071	99.7983	99.7865
523+3	0.000436857	0.00543706	99.74	99.7374
523-3	0.00046046	0.00607033	99.7595	99.7515
524+3	0.0001924	0.00264847	99.9118	99.9002
524-3	0.000215627	0.00328241	99.9111	99.9029
525+3	0.000357657	0.00477413	99.8395	99.834
525-3	0.000334367	0.00413568	99.7947	99.8101
526+3	0.000203848	0.00269856	99.9063	99.8983
526-3	0.000228179	0.0033631	99.9093	99.9125
527+3	0.000370476	0.00491264	99.8337	99.8309
527-3	0.000347165	0.00427348	99.7836	99.8061
528+3	0.000314455	0.00388632	99.8439	99.8314
528-3	0.000337601	0.00452569	99.858	99.8628
529+3	0.000203848	0.00269856	99.9063	99.8983
529-3	0.000228179	0.0033631	99.9093	99.9125
53+3	0.000807769	0.00887773	99.6264	99.6273
53-3	0.000876243	0.010015	99.5302	99.5063
530+3	0.000238546	0.00313311	99.8914	99.8794
530-3	0.00026291	0.00379276	99.8711	99.8623
531+3	0.000313838	0.00439052	99.8447	99.837
531-3	0.000285687	0.00364216	99.8414	99.8453
532+3	0.000899393	0.0106578	99.4289	99.4185
532-3	0.000925819	0.0113175	99.4892	99.4446
533+3	0.000470994	0.00556442	99.7407	99.7373
533-3	0.000491306	0.00614228	99.7803	99.7671
534+3	0.000406674	0.00487663	99.7905	99.7667
534-3	0.000429042	0.00550106	99.8093	99.7979
535+3	0.000550193	0.00685586	99.745	99.7183
535-3	0.000526228	0.00620137	99.6807	99.6824
536+3	0.000418931	0.00555878	99.8003	99.7836
536-3	0.000393835	0.00489067	99.7627	99.7604
537+3	0.00163583	0.0192477	98.9339	98.9726
537-3	0.00172667	0.0203354	99.0638	99.0323
538+3	0.000943569	0.0111589	99.3947	99.3955
538-3	0.000969662	0.0118054	99.457	99.4154
539+3	0.000434183	0.0051707	99.7757	99.7538
539-3	0.000454744	0.00575199	99.7998	99.7862
54+3	0.000899117	0.0102218	99.5917	99.6096
54-3	0.00095177	0.0108063	99.4942	99.4634
540+3	0.000369897	0.00448349	99.8182	99.7933
540-3	0.000392482	0.0051111	99.8365	99.8306
541+3	0.000563022	0.00699466	99.7251	99.7049
541-3	0.000538989	0.00633874	99.6754	99.6645
542+3	0.00109754	0.012898	99.3158	99.3124
542-3	0.00112547	0.0135673	99.3655	99.3275
543+3	0.000943569	0.0111589	99.3947	99.3955
543-3	0.000969662	0.0118054	99.457	99.4154
544+3	0.000855383	0.0101611	99.4505	99.446
544-3	0.000881122	0.0108094	99.5191	99.4705
545+3	0.000379079	0.00458157	99.8088	99.7832
545-3	0.000401614	0.00520859	99.8266	99.8208
546+3	0.000379079	0.00458157	99.8088	99.7832
546-3	0.000401614	0.00520859	99.8266	99.8208
547+3	0.000511686	0.00643932	99.7638	99.7367
547-3	0.000487855	0.00578851	99.702	99.7101
548+3	0.000943569	0.0111589	99.3947	99.3955
548-3	0.000969662	0.0118054	99.457	99.4154
549+3	0.00167309	0.0196662	98.9037	98.9398
549-3	0.00176465	0.0207603	99.0369	99.0127
55+3	0.000833589	0.00920062	99.5888	99.5395
55-3	0.000835464	0.00876611	99.597	99.5613
550+3	0.00159859	0.01883	98.9561	98.9907
550-3	0.00168865	0.0199094	99.089	99.0602
551+3	0.000899393	0.0106578	99.4289	99.4185
551-3	0.000925819	0.0113175	99.4892	99.4446
552+3	0.000921377	0.0109061	99.4108	99.4019
552-3	0.000947797	0.0115628	99.475	99.4255
553+3	0.000425025	0.0050728	99.7822	99.7586
553-3	0.000445626	0.00565509	99.803	99.7923
554+3	0.000855383	0.0101611	99.4505	99.446
554-3	0.000881122	0.0108094	99.5191	99.4705
555+3	0.00167309	0.0196662	98.9037	98.9398
555-3	0.00176465	0.0207603	99.0369	99.0127
556+3	0.00258191	0.0298707	98.2615	98.4788
556-3	0.00262759	0.030379	98.3998	98.4295
557+3	0.00167309	0.0196662	98.9037	98.9398
557-3	0.00176465	0.0207603	99.0369	99.0127
558+3	0.00156138	0.0184125	98.9819	99.017
558-3	0.00165062	0.019483	99.1088	99.0811
559+3	0.000921377	0.0109061	99.4108	99.4019
559-3	0.000947797	0.0115628	99.475	99.4255
56+3	0.00085702	0.00943373	99.5783	99.5297
56-3	0.000858667	0.00899877	99.5644	99.5492
560+3	0.000317942	0.00400149	99.8268	99.8256
560-3	0.000345938	0.00474433	99.8345	99.8209
561+3	0.000329202	0.00455117	99.8422	99.8278
561-3	0.000301831	0.00382207	99.8364	99.8339
562+3	0.00144972	0.0171613	99.0869	99.1043
562-3	0.00153657	0.0182039	99.1724	99.1244
563+3	0.000899393	0.0106578	99.4289	99.4185
563-3	0.000925819	0.0113175	99.4892	99.4446
564+3	0.000406674	0.00487663	99.7905	99.7667
564-3	0.000429042	0.00550106	99.8093	99.7979
565+3	0.000406674	0.00487663	99.7905	99.7667
565-3	0.000429042	0.00550106	99.8093	99.7979
566+3	0.000575867	0.00713354	99.7114	99.6941
566-3	0.00055176	0.0064759	99.67	99.6602
567+3	0.00171581	0.0181702	99.0234	99.0336
567-3	0.00168068	0.0175373	99.0686	99.0576
568+3	0.00117141	0.0127714	99.3139	99.3111
568-3	0.00114831	0.0121814	99.3168	99.2777
569+3	0.00115688	0.0132	99.3716	99.3551
569-3	0.00114168	0.0126854	99.31	99.3364
57+3	0.000904445	0.00990567	99.5415	99.5029
57-3	0.000905724	0.00946954	99.5442	99.5303
570+3	0.00144986	0.0168117	99.183	99.1762
570-3	0.00143602	0.0163237	99.1307	99.1624
571+3	0.00173808	0.0203474	98.9951	98.9794
571-3	0.00174048	0.0204209	98.917	98.9586
572+3	0.00109227	0.0119757	99.35	99.3445
572-3	0.00106909	0.0113776	99.3539	99.3302
573+3	0.00127686	0.0138315	99.2745	99.2641
573-3	0.00125442	0.0132651	99.2696	99.2347
574+3	0.00133344	0.0150692	99.2414	99.2356
574-3	0.00132097	0.0145959	99.2124	99.2019
575+3	0.00137698	0.0160111	99.2367	99.2057
575-3	0.00136205	0.0155054	99.1686	99.1804
576+3	0.00141335	0.0164099	99.2038	99.1932
576-3	0.00139916	0.0159176	99.1439	99.1695
577+3	0.00173808	0.0203474	98.9951	98.9794
577-3	0.00174048	0.0204209	98.917	98.9586
578+3	0.00127456	0.0144455	99.2936	99.2776
578-3	0.00126114	0.0139583	99.2406	99.2505
579+3	0.00122411	0.0133012	99.2925	99.2922
579-3	0.00120153	0.0127275	99.2868	99.2567
58+3	0.000558066	0.00650162	99.7197	99.7053
58-3	0.00057745	0.0066267	99.7142	99.6868
580+3	0.00139226	0.0156917	99.1877	99.2091
580-3	0.00138075	0.0152329	99.1772	99.1697
581+3	0.0015589	0.0180061	99.1234	99.1125
581-3	0.00154658	0.0175423	99.0532	99.094
582+3	0.00166788	0.0191995	99.0545	99.0503
582-3	0.00167974	0.0193796	98.9731	99.0225
583+3	0.0018737	0.0218632	98.912	98.898
583-3	0.00187646	0.0219485	98.7995	98.8882
584+3	0.00109797	0.0125761	99.4248	99.4071
584-3	0.00108191	0.0120485	99.3471	99.3628
585+3	0.0010659	0.0117102	99.3596	99.3599
585-3	0.00104275	0.0111104	99.3673	99.3407
586+3	0.00109638	0.0118656	99.3569	99.3171
586-3	0.00114175	0.0121375	99.435	99.3861
587+3	0.000379348	0.0045187	99.8197	99.796
587-3	0.00040541	0.00517909	99.8182	99.7569
588+3	0.000362439	0.00434149	99.8342	99.8002
588-3	0.000388231	0.00499939	99.8226	99.7818
589+3	0.000520328	0.00612771	99.7915	99.7742
589-3	0.000474317	0.00590024	99.7628	99.6873
59+3	0.00158849	0.0158195	99.3094	99.3426
59-3	0.00175314	0.0174223	99.3649	99.3672
590+3	0.00327625	0.0366974	97.8731	97.873
590-3	0.00284605	0.0324592	98.2316	98.3104
591+3	0.00327625	0.0366974	97.8731	97.873
591-3	0.00303746	0.0345861	98.1148	98.1895
592+3	0.00197278	0.0225236	98.7042	98.7586
592-3	0.00185562	0.0214838	98.9452	98.9689
593+3	0.00408152	0.0465302	97.4185	97.504
593-3	0.00569804	0.062362	96.4173	96.3686
594+3	0.00428551	0.0488405	97.2792	97.3542
594-3	0.00569804	0.062362	96.4173	96.3686
595+3	0.00321959	0.0368052	97.9691	98.0928
595-3	0.00371926	0.041286	97.6481	97.6695
596+3	0.00248383	0.0280959	98.33	98.385
596-3	0.00225892	0.0259503	98.6561	98.6676
597+3	0.00438428	0.0486654	97.2274	97.2529
597-3	0.00378201	0.0428499	97.6966	97.8258
598+3	0.0046806	0.0533229	96.9886	97.1248
598-3	0.00706112	0.076858	95.6057	95.523
599+3	0.00387327	0.0441771	97.5163	97.6525
599-3	0.00488098	0.0536897	96.9715	96.9548
6+3	0.000279464	0.0035952	99.8716	99.8653
6-3	0.000400242	0.0053378	99.75	99.7513
60+3	0.000742423	0.00829301	99.6389	99.6102
60-3	0.000745139	0.00785224	99.6213	99.609
600+3	0.00274442	0.0309287	98.1664	98.232
600-3	0.00245695	0.028145	98.5052	98.5586
601+3	0.00672496	0.0767268	95.607	95.777
601-3	0.0131216	0.13968	91.8826	91.9965
602+3	0.00060459	0.00701204	99.7368	99.7318
602-3	0.000634059	0.00770414	99.7222	99.6346
603+3	0.000688562	0.00789201	99.7076	99.6751
603-3	0.000720521	0.00860841	99.6896	99.5858
604+3	0.000570931	0.00665908	99.7635	99.7485
604-3	0.00059955	0.00734322	99.7374	99.664
605+3	0.000537171	0.00630417	99.7782	99.7682
605-3	0.000491525	0.00608009	99.7491	99.6781
606+3	0.000486605	0.00577436	99.8013	99.788
606-3	0.000439833	0.00553926	99.7912	99.7143
607+3	0.000345537	0.00416429	99.8408	99.8058
607-3	0.000369283	0.00477707	99.8358	99.7987
608+3	0.000587771	0.0068357	99.7483	99.7465
608-3	0.000616799	0.00752358	99.7338	99.643
609+3	0.000486605	0.00577436	99.8013	99.788
609-3	0.000439833	0.00553926	99.7912	99.7143
61+3	0.000694559	0.00780914	99.6717	99.649
61-3	0.000677808	0.00725103	99.6392	99.6394
610+3	0.000722117	0.00824393	99.6915	99.6628
610-3	0.000755145	0.00897035	99.6753	99.5703
611+3	0.000396232	0.00469553	99.8148	99.791
611-3	0.000422625	0.00535925	99.806	99.7318
612+3	0.000705348	0.00806817	99.6999	99.6724
612-3	0.000737823	0.00878913	99.6802	99.5752
613+3	0.000587771	0.0068357	99.7483	99.7465
613-3	0.000616799	0.00752358	99.7338	99.643
614+3	0.000621405	0.00718828	99.7249	99.722
614-3	0.000651339	0.00788483	99.7124	99.6202
615+3	0.000520328	0.00612771	99.7915	99.7742
615-3	0.000474317	0.00590024	99.7628	99.6873
616+3	0.000705348	0.00806817	99.6999	99.6724
616-3	0.000737823	0.00878913	99.6802	99.5752
617+3	0.00055402	0.00648074	99.7713	99.7628
617-3	0.00050877	0.00626034	99.742	99.6723
618+3	0.000537171	0.00630417	99.7782	99.7682
618-3	0.000491525	0.00608009	99.7491	99.6781
619+3	0.000638189	0.00736412	99.7229	99.7073
619-3	0.000668587	0.00806468	99.71	99.6156
62+3	0.000344978	0.0043171	99.8745	99.837
62-3	0.000346133	0.00384825	99.8312	99.7976
620+3	0.000379348	0.0045187	99.8197	99.796
620-3	0.00040541	0.00517909	99.8182	99.7569
621+3	0.000789108	0.00894615	99.6527	99.628
621-3	0.000824494	0.00969507	99.6203	99.5097
622+3	0.000671782	0.0077162	99.7116	99.6845
622-3	0.000703217	0.00842737	99.6988	99.5936
623+3	0.00055402	0.00648074	99.7713	99.7628
623-3	0.00050877	0.00626034	99.742	99.6723
624+3	0.000396232	0.00469553	99.8148	99.791
624-3	0.000422625	0.00535925	99.806	99.7318
625+3	0.000906011	0.0101717	99.5827	99.5498
625-3	0.000946063	0.0109645	99.5068	99.4261
626+3	0.000839271	0.0094721	99.6258	99.6023
626-3	0.000876566	0.0102392	99.6009	99.4737
627+3	0.000805841	0.00912162	99.649	99.6196
627-3	0.000841847	0.00987657	99.6178	99.4996
628+3	0.000537171	0.00630417	99.7782	99.7682
628-3	0.000491525	0.00608009	99.7491	99.6781
629+3	0.000621405	0.00718828	99.7249	99.722
629-3	0.000651339	0.00788483	99.7124	99.6202
63+3	0.000572986	0.00610768	99.7376	99.7218
63-3	0.000599285	0.00678282	99.7594	99.7514
630+3	0.000486605	0.00577436	99.8013	99.788
630-3	0.000439833	0.00553926	99.7912	99.7143
631+3	0.00213842	0.0232015	98.9271	98.8865
631-3	0.00267141	0.0285865	98.7764	98.6399
632+3	0.00237332	0.0257911	98.8558	98.825
632-3	0.00291881	0.0311162	98.6868	98.5372
633+3	0.00219294	0.0237717	98.9134	98.8692
633-3	0.00275346	0.0294263	98.7322	98.6057
634+3	0.000638189	0.00736412	99.7229	99.7073
634-3	0.000668587	0.00806468	99.71	99.6156
635+3	0.000396232	0.00469553	99.8148	99.791
635-3	0.000422625	0.00535925	99.806	99.7318
636+3	0.000534575	0.00562078	99.7805	99.7462
636-3	0.000689439	0.00750059	99.7377	99.7257
637+3	0.000656418	0.00676678	99.7138	99.6898
637-3	0.000689439	0.00750059	99.7377	99.7257
638+3	0.000656418	0.00676678	99.7138	99.6898
638-3	0.000689439	0.00750059	99.7377	99.7257
639+3	0.000534575	0.00562078	99.7805	99.7462
639-3	0.00056354	0.00631466	99.7908	99.7751
64+3	0.000374723	0.00467387	99.8187	99.8137
64-3	0.000350553	0.00400048	99.8428	99.8275
640+3	0.000410962	0.00444978	99.8246	99.8108
640-3	0.00056354	0.00631466	99.7908	99.7751
641+3	0.000410962	0.00444978	99.8246	99.8108
641-3	0.00056354	0.00631466	99.7908	99.7751
642+3	0.000656418	0.00676678	99.7138	99.6898
642-3	0.000815661	0.00869013	99.6471	99.6528
643+3	0.000410962	0.00444978	99.8246	99.8108
643-3	0.00043797	0.00513189	99.8485	99.8365
644+3	0.000534575	0.00562078	99.7805	99.7462
644-3	0.000689439	0.00750059	99.7377	99.7257
645+3	0.000534575	0.00562078	99.7805	99.7462
645-3	0.000689439	0.00750059	99.7377	99.7257
646+3	0.000656418	0.00676678	99.7138	99.6898
646-3	0.000689439	0.00750059	99.7377	99.7257
647+3	0.000534575	0.00562078	99.7805	99.7462
647-3	0.000689439	0.00750059	99.7377	99.7257
648+3	0.000410962	0.00444978	99.8246	99.8108
648-3	0.00056354	0.00631466	99.7908	99.7751
649+3	0.000534575	0.00562078	99.7805	99.7462
649-3	0.00056354	0.00631466	99.7908	99.7751
65+3	0.00107383	0.0117268	99.5041	99.466
65-3	0.000988846	0.0102975	99.4941	99.4735
650+3	0.000534575	0.00562078	99.7805	99.7462
650-3	0.000689439	0.00750059	99.7377	99.7257
651+3	0.000534575	0.00562078	99.7805	99.7462
651-3	0.000689439	0.00750059	99.7377	99.7257
652+3	0.000287515	0.00328816	99.8883	99.862
652-3	0.00043797	0.00513189	99.8485	99.8365
653+3	0.000534575	0.00562078	99.7805	99.7462
653-3	0.00056354	0.00631466	99.7908	99.7751
654+3	0.00269179	0.0272008	99.2866	99.23
654-3	0.00247645	0.0254097	99.0828	99.1128
655+3	0.00312379	0.0313377	98.8531	98.8173
655-3	0.00368007	0.0372482	98.4225	98.4569
656+3	0.00358744	0.0364028	98.4408	98.5084
656-3	0.00349779	0.0357392	98.3673	98.3043
657+3	0.00747712	0.071617	96.1479	96.3451
657-3	0.00758494	0.0730191	96.7542	96.7169
658+3	0.00252574	0.0263124	98.8653	98.7343
658-3	0.0029593	0.0308049	98.7364	98.7971
659+3	0.00668659	0.0674334	96.8397	97.1064
659-3	0.00590302	0.0592492	97.0945	97.1529
66+3	0.000711277	0.00743305	99.659	99.6493
66-3	0.000697767	0.00773866	99.7126	99.7066
660+3	0.000337658	0.0040734	99.8347	99.8297
660-3	0.000370079	0.0048311	99.845	99.805
661+3	0.000694006	0.00753535	99.6791	99.6614
661-3	0.00073532	0.00745209	99.6787	99.6549
662+3	0.00351692	0.0363328	98.4965	98.3302
662-3	0.00416903	0.0429669	98.2315	98.3594
663+3	0.0056193	0.0586566	97.469	97.5512
663-3	0.00479131	0.0493107	97.3927	97.5442
664+3	0.0061512	0.0625083	96.7012	96.7369
664-3	0.00579568	0.0579633	96.7689	96.9757
665+3	0.00318215	0.03219	99.1147	99.0775
665-3	0.00310614	0.0319074	98.9984	99.0984
666+3	0.0088636	0.088131	95.4155	95.4071
666-3	0.00977824	0.0981425	94.5599	94.9825
667+3	0.00608338	0.0641062	96.8086	96.9525
667-3	0.00511613	0.0530445	97.6109	97.5635
668+3	0.00675187	0.0726997	96.3462	96.7166
668-3	0.00613621	0.064948	96.8679	96.8397
669+3	0.00120187	0.0133381	99.4205	99.4386
669-3	0.00162827	0.0176949	99.5084	99.4834
67+3	0.000437147	0.00478203	99.8086	99.7972
67-3	0.000417804	0.0050372	99.8405	99.8381
670+3	0.00264634	0.0280465	98.6809	98.6789
670-3	0.00246019	0.0262421	98.8675	98.9077
671+3	0.00158861	0.0173711	99.2111	99.2132
671-3	0.0020261	0.0219545	99.2387	99.2657
672+3	0.00151911	0.0165014	99.3263	99.2853
672-3	0.00173977	0.0186986	99.3085	99.3171
673+3	0.00176895	0.0194695	99.1434	99.2328
673-3	0.00172077	0.0190709	99.2801	99.1609
674+3	0.0019045	0.0200541	99.2526	99.2599
674-3	0.00201308	0.0209557	99.2483	99.2813
675+3	0.00120939	0.0132499	99.4371	99.5023
675-3	0.00118216	0.0125963	99.5753	99.5381
676+3	0.00138305	0.0147637	99.3859	99.4344
676-3	0.00121746	0.0130555	99.4612	99.4287
677+3	0.00387891	0.0392031	97.8665	97.9387
677-3	0.003484	0.035296	98.1896	98.088
678+3	0.00399763	0.0411124	98.219	98.2212
678-3	0.00414638	0.0418978	98.2801	98.2516
679+3	0.00215243	0.0216101	99.421	99.4349
679-3	0.00203147	0.0209819	99.4656	99.4001
68+3	0.000437147	0.00478203	99.8086	99.7972
68-3	0.000417804	0.0050372	99.8405	99.8381
680+3	0.00246503	0.0248339	99.4835	99.4827
680-3	0.00235108	0.0237795	99.4642	99.3672
681+3	0.00321682	0.0344511	98.4411	98.5324
681-3	0.00307061	0.0323902	98.669	98.6276
682+3	0.00247291	0.0254115	99.1729	99.1781
682-3	0.00233415	0.0242311	99.2244	99.2882
683+3	0.0022843	0.0234476	99.3728	99.294
683-3	0.00282621	0.0285306	99.212	99.1914
684+3	0.00274547	0.0277116	99.434	99.3357
684-3	0.00271746	0.0271898	99.2784	99.262
685+3	0.00403108	0.0409493	98.0131	98.0985
685-3	0.00382007	0.0391666	98.2385	98.2848
686+3	0.00377662	0.0381036	98.262	98.2987
686-3	0.00381507	0.037659	98.2386	98.3198
687+3	0.00424472	0.0435526	97.8721	97.863
687-3	0.00408689	0.0422256	97.8479	97.8746
688+3	0.00354507	0.0361503	98.1976	98.2191
688-3	0.00327481	0.0337751	98.3986	98.4506
689+3	0.00282516	0.0298627	98.7875	98.6613
689-3	0.00305901	0.0319588	98.7477	98.7138
69+3	0.000459182	0.00499903	99.7891	99.7759
69-3	0.000443089	0.00528089	99.8335	99.8138
690+3	0.00277757	0.0285797	99.3803	99.2584
690-3	0.0022948	0.0234659	99.3523	99.3713
691+3	0.00340802	0.0355508	98.1437	98.1759
691-3	0.00344186	0.0353093	98.5965	98.5709
692+3	0.00228642	0.0233873	99.349	99.3511
692-3	0.00265204	0.0272892	99.3541	99.2474
693+3	0.0030328	0.0304825	98.9804	99.0046
693-3	0.00320534	0.0318208	99.1923	99.0837
694+3	0.00282718	0.028688	99.1864	99.1279
694-3	0.0030522	0.0302795	98.9836	99.0113
695+3	0.00416364	0.0433641	98.0602	98.0633
695-3	0.00387132	0.0398156	98.2606	98.3237
696+3	0.00201241	0.021084	99.2945	99.28
696-3	0.00256642	0.0267487	99.0621	99.027
697+3	0.00266465	0.0267578	99.3328	99.4021
697-3	0.00227607	0.0236028	99.327	99.2653
698+3	0.00377283	0.0384681	98.4097	98.4618
698-3	0.00330586	0.0339045	98.6256	98.6235
699+3	0.00335661	0.0347131	98.5235	98.6611
699-3	0.00317402	0.0328202	98.6803	98.6718
7+3	0.000244013	0.00338387	99.9381	99.9112
7-3	0.000290888	0.00342377	99.864	99.8618
70+3	0.0004481	0.00489022	99.7946	99.7895
70-3	0.000430325	0.00515788	99.8376	99.8246
700+3	0.00187012	0.0192781	99.4801	99.4236
700-3	0.00218546	0.0225821	99.4256	99.3757
701+3	0.00209061	0.0210727	99.495	99.4613
701-3	0.00208749	0.0218244	99.4866	99.4719
702+3	0.0023291	0.024222	99.4213	99.4096
702-3	0.00232499	0.0238329	99.4017	99.3705
703+3	0.00271039	0.0280054	99.5936	99.5369
703-3	0.00243171	0.0247123	99.4858	99.3978
704+3	0.0023111	0.0239569	99.5376	99.4925
704-3	0.0023891	0.0243973	99.4683	99.3987
705+3	0.00209106	0.0220676	99.0476	99.0957
705-3	0.00236011	0.0247043	99.3541	99.2073
706+3	0.00209653	0.0218089	99.0948	99.1502
706-3	0.00213168	0.0219804	99.3744	99.2585
707+3	0.0017327	0.0179126	99.4444	99.4651
707-3	0.00192546	0.02003	99.4724	99.4191
708+3	0.0017327	0.0179126	99.4444	99.4651
708-3	0.00192546	0.02003	99.4724	99.4191
709+3	0.00226841	0.0234505	99.1668	99.1485
709-3	0.00261817	0.0269683	99.2415	99.2604
71+3	0.000416278	0.00457624	99.8141	99.7995
71-3	0.000393713	0.00480609	99.8418	99.8505
710+3	0.00237676	0.0238226	99.5664	99.5952
710-3	0.00222213	0.0226166	99.5849	99.5273
711+3	0.00269179	0.0272008	99.2866	99.23
711-3	0.00247645	0.0254097	99.0828	99.1128
712+3	0.0040714	0.0428148	97.7752	97.8366
712-3	0.00313157	0.0328943	98.3351	98.442
713+3	0.00626114	0.0612129	96.917	96.9963
713-3	0.00552521	0.0536509	97.6269	97.6544
714+3	0.00305375	0.031246	98.8974	98.7806
714-3	0.00319287	0.0322969	98.5732	98.6648
715+3	0.00687583	0.0709251	96.2921	96.4486
715-3	0.00622873	0.0632176	96.6131	96.7874
716+3	0.00993828	0.10307	94.1986	94.3095
716-3	0.00672371	0.0698761	96.1755	96.4625
717+3	0.00205459	0.0221551	99.1443	99.0998
717-3	0.00214146	0.0229101	99.1078	99.0826
718+3	0.00205143	0.022024	98.9259	98.9382
718-3	0.00226353	0.0236671	99.1582	99.059
719+3	0.00747097	0.0772422	96.3521	96.2841
719-3	0.0063635	0.0663298	96.765	96.8412
72+3	0.000416278	0.00457624	99.8141	99.7995
72-3	0.000393713	0.00480609	99.8418	99.8505
720+3	0	0	100	100
720-3	0	0	100	100
721+3	0.00207616	0.0223604	98.878	98.9354
721-3	0.00229131	0.0248628	98.8486	98.8448
722+3	0	0	100	100
722-3	0	0	100	100
723+3	0.00175058	0.0187991	99.0576	99.0335
723-3	0.00170607	0.0188756	99.0885	99.0276
724+3	0	0	100	100
724-3	0	0	100	100
725+3	0.00179638	0.0195457	99.006	99.0822
725-3	0.00225633	0.0246169	99.2319	99.2078
726+3	0.00134059	0.0145814	99.3418	99.3176
726-3	0.00175632	0.0188287	99.3624	99.2994
727+3	0.00168436	0.0179954	99.4194	99.3976
727-3	0.00183071	0.0196018	99.3863	99.407
728+3	0.0016378	0.0177656	99.4003	99.3783
728-3	0.00185424	0.0199413	99.275	99.2966
729+3	0.00305286	0.037337	98.006	98.2587
729-3	0.00442099	0.0522539	97.3912	97.3709
73+3	0.000416278	0.00457624	99.8141	99.7995
73-3	0.000393713	0.00480609	99.8418	99.8505
730+3	0.00150717	0.0163033	99.3517	99.3893
730-3	0.00159336	0.0173295	99.4458	99.3739
731+3	0.00174497	0.0189517	99.2425	99.2803
731-3	0.00187639	0.0204192	99.379	99.3333
732+3	0.00260749	0.0277782	98.6383	98.6143
732-3	0.00256648	0.0276027	98.469	98.4384
733+3	0.00300168	0.0314727	98.6985	98.6573
733-3	0.00285241	0.0292526	98.7352	98.748
734+3	0.00444997	0.0461833	98.278	98.1452
734-3	0.00369716	0.0373311	98.4159	98.5796
735+3	0.0022104	0.0224252	99.3288	99.3044
735-3	0.00319931	0.0324365	99.1356	99.1704
736+3	0.0219893	0.226651	87.1533	87.8123
736-3	0.0124136	0.133725	92.4898	92.6754
737+3	0.000175697	0.00289999	99.9362	99.9195
737-3	0.000142824	0.00220024	99.9293	99.9034
738+3	0.000254857	0.00363125	99.9063	99.8767
738-3	0.000235754	0.00341369	99.9214	99.9067
739+3	0	0	100	100
739-3	0	0	100	100
74+3	0.000416278	0.00457624	99.8141	99.7995
74-3	0.000393713	0.00480609	99.8418	99.8505
740+3	0.00208941	0.0217164	99.2565	99.1778
740-3	0.00237715	0.0250215	99.2324	99.339
741+3	0.00337258	0.0350778	98.5306	98.6371
741-3	0.00325422	0.0337492	98.691	98.69
742+3	0.00199023	0.021366	99.1251	99.0886
742-3	0.00232011	0.0247741	99.0621	99.0443
743+3	0.00174881	0.0186151	99.1392	99.1322
743-3	0.00159433	0.017605	99.1859	99.1515
744+3	0.00312041	0.0325674	98.3013	98.4527
744-3	0.00301294	0.0319073	98.4767	98.5086
745+3	0.00133264	0.0144826	99.3444	99.3228
745-3	0.00173309	0.0185648	99.3783	99.3301
746+3	0.00157625	0.0172018	99.267	99.2885
746-3	0.00181056	0.0198898	99.4254	99.4025
747+3	0.00295443	0.0302375	99.1325	99.0527
747-3	0.00296964	0.0310974	99.0441	99.0788
748+3	0.0112099	0.120755	93.0209	93.2081
748-3	0.0107806	0.113827	93.8292	93.9795
749+3	0.00156818	0.0170899	99.4922	99.5216
749-3	0.00148028	0.0160768	99.4386	99.4209
75+3	0.00047078	0.00511337	99.7795	99.767
75-3	0.000456092	0.00540643	99.813	99.794
750+3	0.00165006	0.0181628	99.2415	99.2693
750-3	0.00141721	0.015594	99.173	99.2777
751+3	0.00292	0.0288434	99.3124	99.2793
751-3	0.00347592	0.0351923	98.9292	98.9056
752+3	0.00323679	0.0327905	99.0734	99.0261
752-3	0.00292389	0.0298922	98.8065	98.837
753+3	0.00215423	0.0224614	98.9786	98.9985
753-3	0.00293673	0.0300593	98.72	98.7885
754+3	0.00277262	0.0279757	99.0007	99.0652
754-3	0.00280302	0.0286816	98.9569	98.9664
755+3	0.00265777	0.0267773	99.0459	99.0631
755-3	0.00320595	0.0326583	98.8748	98.9478
756+3	0.00246766	0.0256633	99.3482	99.3548
756-3	0.00238548	0.0244273	99.2385	99.2026
757+3	0.0045583	0.0466979	97.8116	97.9601
757-3	0.00395564	0.040484	98.1161	98.1002
758+3	0.00236845	0.0240922	99.3675	99.3442
758-3	0.00287415	0.0286918	99.1396	99.1075
759+3	0.00208711	0.0212006	99.3957	99.3397
759-3	0.00282486	0.0285563	99.1725	99.2051
76+3	0.000602604	0.00692643	99.705	99.683
76-3	0.000598135	0.00644495	99.685	99.6729
760+3	0.0078208	0.0807043	96.0462	96.09
760-3	0.00685676	0.0711113	96.1734	96.3009
761+3	0.00492275	0.0528097	97.6384	97.6968
761-3	0.00385334	0.0409174	98.1664	98.1148
762+3	0.00355699	0.0368824	98.5303	98.5142
762-3	0.00348676	0.0356133	98.728	98.6635
763+3	0.00248644	0.0266954	98.9453	98.9203
763-3	0.00243157	0.0254895	99.1263	99.0376
764+3	0.00238871	0.0250753	99.2906	99.2761
764-3	0.0020498	0.0210843	99.3988	99.3928
765+3	0.00369719	0.0380649	98.499	98.518
765-3	0.00352788	0.0355276	98.7152	98.7153
766+3	0.00294329	0.0313735	98.7632	98.6781
766-3	0.00276062	0.0288491	98.8867	98.9747
767+3	0.00235722	0.0253246	99.0078	99.1152
767-3	0.00269045	0.0284121	99.2115	99.1366
768+3	0.00280811	0.0283404	99.0512	99.0496
768-3	0.00270746	0.0277794	98.8986	98.8867
769+3	0.00244592	0.0246426	99.225	99.1685
769-3	0.00315519	0.0312778	99.0221	99.061
77+3	0.000534291	0.00626556	99.725	99.7127
77-3	0.000554747	0.00639874	99.761	99.7124
770+3	0.00356074	0.0372567	98.3326	98.2933
770-3	0.00391839	0.0402584	98.2858	98.47
771+3	0.00214984	0.0220384	99.3103	99.1967
771-3	0.00286877	0.0296353	99.1428	99.1453
772+3	0.00236416	0.0239823	99.3778	99.2909
772-3	0.00264226	0.026793	99.2772	99.2855
773+3	0.00263479	0.0275018	99.0888	99.0806
773-3	0.00229475	0.0238566	99.2045	99.2814
774+3	0.00268201	0.0280808	99.0559	99.0485
774-3	0.00293968	0.0301617	99.1961	99.2678
775+3	0.00282901	0.0292566	99.0357	98.9577
775-3	0.0029724	0.0304464	99.1841	99.1997
776+3	0.00330235	0.0337263	98.6941	98.6566
776-3	0.00322941	0.0327915	98.9307	98.8504
777+3	0.00741605	0.0772152	95.7507	96.0224
777-3	0.00749425	0.0770766	96.2994	96.1745
778+3	0.00542163	0.0560056	96.9835	97.0795
778-3	0.00553847	0.056337	97.304	97.1951
779+3	0.00385783	0.039454	98.0191	98.0211
779-3	0.00361723	0.0366877	98.2539	98.2112
78+3	0.00115348	0.0125872	99.5088	99.4602
78-3	0.00117582	0.0128338	99.4649	99.4388
780+3	0.00551544	0.0583963	97.096	97.1796
780-3	0.00535846	0.0563433	96.9172	96.9491
781+3	0.00409449	0.0418705	97.8826	98.017
781-3	0.00401616	0.0407385	98.0701	98.0271
782+3	0.00339902	0.0346633	98.5274	98.635
782-3	0.00346093	0.0356688	98.6406	98.5108
783+3	0.00548982	0.056121	97.1679	97.2009
783-3	0.00540515	0.0543873	97.23	97.248
784+3	0.00266677	0.027217	99.3548	99.4056
784-3	0.00261367	0.0263012	99.2867	99.2021
785+3	0.0083014	0.0853774	95.1331	95.4049
785-3	0.00864406	0.0865146	95.2968	95.206
786+3	0.00119965	0.0152733	99.3365	99.3554
786-3	0.000993354	0.0128753	99.4439	99.4245
787+3	0.00120238	0.0153117	99.3352	99.353
787-3	0.000995578	0.0129084	99.4431	99.4242
788+3	0.00119965	0.0152733	99.3365	99.3554
788-3	0.000993354	0.0128753	99.4439	99.4245
789+3	0.0015797	0.0181498	99.2008	99.16
789-3	0.00149613	0.017247	99.0448	99.0923
79+3	0.00114765	0.0128799	99.4575	99.4836
79-3	0.00121632	0.0135473	99.4361	99.3919
790+3	0.00795069	0.0833672	95.5522	95.6421
790-3	0.00613356	0.066613	96.2503	96.3942
791+3	0.00253149	0.0300217	98.4704	98.5876
791-3	0.00215075	0.0254783	98.7966	98.7765
792+3	0.00103691	0.0122117	99.4799	99.465
792-3	0.00101472	0.0120049	99.4032	99.4049
793+3	0.00396109	0.0416857	97.9302	97.9166
793-3	0.00399799	0.0421055	97.9081	97.9791
794+3	0.0022598	0.0264921	98.7338	98.7449
794-3	0.00160762	0.0193401	99.0137	98.9478
795+3	0.0108923	0.114367	93.7037	93.9213
795-3	0.00872014	0.0930444	94.3608	94.5455
796+3	0.00229286	0.0263092	98.7564	98.7608
796-3	0.00198948	0.0232444	98.8458	98.8111
797+3	0.000463523	0.00572128	99.7688	99.7463
797-3	0.000431746	0.00530367	99.7405	99.6726
798+3	0.000512698	0.00640618	99.7585	99.7326
798-3	0.000580259	0.00714215	99.7153	99.6595
799+3	0.00161147	0.0172342	99.3246	99.3606
799-3	0.00145605	0.0158879	99.4022	99.4161
8+3	0.00186645	0.0193956	99.138	99.1184
8-3	0.00252809	0.0267818	98.5727	98.6937
80+3	0.000375534	0.00437442	99.8386	99.8206
80-3	0.000416006	0.00516449	99.8239	99.7767
800+3	0.00683591	0.070645	95.918	96.2089
800-3	0.0073888	0.0748718	95.8442	95.8426
801+3	0.00185551	0.0193112	99.1971	99.2511
801-3	0.00199022	0.0209623	99.1425	99.1116
81+3	0.000446131	0.00511137	99.7839	99.7832
81-3	0.000484357	0.0058817	99.7911	99.7595
82+3	0.000610208	0.00681119	99.6992	99.6701
82-3	0.000650299	0.00761977	99.687	99.6568
83+3	0.000610208	0.00681119	99.6992	99.6701
83-3	0.000650299	0.00761977	99.687	99.6568
84+3	0.00172501	0.0176128	99.2611	99.3114
84-3	0.00186149	0.0187733	99.218	99.2508
85+3	0.000610208	0.00681119	99.6992	99.6701
85-3	0.000650299	0.00761977	99.687	99.6568
86+3	0.000328409	0.00378045	99.8471	99.8313
86-3	0.000358787	0.00446628	99.8175	99.7929
87+3	0.00102793	0.0112884	99.5587	99.514
87-3	0.00100069	0.0111165	99.5511	99.5543
88+3	0.000948257	0.0108085	99.585	99.585
88-3	0.000997163	0.0112552	99.5517	99.4965
89+3	0.000948257	0.0108085	99.585	99.585
89-3	0.000997163	0.0112552	99.5517	99.4965
9+3	0.00179976	0.0187283	99.1608	99.1595
9-3	0.00238905	0.0253343	98.678	98.7713
90+3	0.000635006	0.00714699	99.694	99.6829
90-3	0.000576809	0.00620412	99.7747	99.7359
91+3	0.000695414	0.00779032	99.6818	99.7426
91-3	0.000712609	0.00752631	99.6375	99.6179
92+3	0.000637693	0.00721877	99.7068	99.7589
92-3	0.000652639	0.00692231	99.6712	99.6457
93+3	0.000629455	0.00709093	99.6961	99.6829
93-3	0.000570482	0.00614138	99.779	99.736
94+3	0.000817137	0.00896943	99.6451	99.6924
94-3	0.000799784	0.00839237	99.5939	99.5332
95+3	0.000839704	0.00912257	99.6114	99.6017
95-3	0.000806699	0.00886122	99.6648	99.6397
96+3	0.00110355	0.0118705	99.5335	99.5314
96-3	0.00104614	0.0109752	99.5656	99.5326
97+3	0.000863375	0.00941967	99.622	99.673
97-3	0.000885088	0.00918737	99.5419	99.4894
98+3	0.000706142	0.00785768	99.6655	99.6407
98-3	0.00067774	0.00714698	99.7233	99.6921
99+3	0.000462464	0.00552548	99.8163	99.8116
99-3	0.00046267	0.0050859	99.7966	99.7509

## Sheet: Expt_SA
				Metric
Index	Figure Index	Code	Value (kcal/mol	Error (kcal/mol)	Independent Parameters Influenced	Total Parameters Influenced	-3	+3	Average	Error Rank	Rank
40	188	D40	-7.2226	0.356518	0	0	0	0	0	188	796		20
41	189	D41	-11.37	0.497312	0	0	0	0	0	36	796		21
661	7	R9	-5.9038	0.244019	1	1	0.000370079	0.000337658	0.000353868	464	566		22
721	67	R78	-5.41886	0.23543	1	1	0	0	0	494	796		23
723	69	R80	-11.182	0.396676	1	1	0	0	0	125	796		24
725	71	R82	-7.10534	0.259964	1	1	0	0	0	411	796		25
740	86	R98	-8.7672	0.28785	1	1	0	0	0	328	796		26
20	168	D20	-8.879	0.44829	1	1	0.00161581	0.00125387	0.00143484	67	217		27
21	169	D21	-8.1617	0.438362	1	1	0.000686909	0.000577057	0.000631983	76	354		28
23	171	D23	-7.9805	0.386981	1	1	0.000588359	0.000517693	0.000553026	136	406		29
30	178	D30	-5.60004	0.218722	1	1	0.000540988	0.000311735	0.000426361	543	496		30
32	180	D32	-4.89665	0.204317	1	1	0.000146128	0.00012667	0.000136399	598	755		31
37	185	D37	-4.55305	0.135697	1	1	9.11471e-05	0.000103627	9.7387e-05	778	765		32
38	186	D38	-5.17485	0.194038	1	1	0.00014607	0.000141056	0.000143563	641	753		33
39	187	D39	-5.08105	0.258146	1	1	0.000187231	0.000166033	0.000176632	419	746		34
52	233	H7	-4.6429	0.138011	1	1	4.13686e-05	6.12315e-05	5.13001e-05	776	772		35
153	334	H126	-1.32145	0.12537	1	1	1.36425e-05	9.39799e-06	1.15202e-05	794	783		36
154	335	H127	-0.91545	0.358679	1	1	4.89039e-05	1.96296e-05	3.42667e-05	185	776		37
158	339	H135	-5.5166	0.194585	1	1	6.81876e-08	2.81106e-08	4.81491e-08	640	792		38
159	340	H136	-5.4369	0.192431	1	1	2.21265e-09	1.27285e-09	1.74275e-09	648	794		39
160	341	H137	-4.4354	0.299477	1	1	0	0	0	299	796		40
161	342	H138	-1.02354	0.375497	1	1	5.28201e-09	2.24635e-09	3.76418e-09	150	793		41
162	343	H139	-1.58557	0.311542	1	1	1.61441e-09	7.96665e-10	1.20554e-09	271	795		42
163	344	H141	-3.79291	0.257628	1	1	4.81635e-05	4.48381e-05	4.65008e-05	420	774		43
165	346	H149	-4.3008	0.170121	1	1	4.23732e-05	4.1957e-05	4.21651e-05	715	775		44
167	348	H152	-4.01847	0.19619	1	1	3.23327e-05	3.02527e-05	3.12927e-05	630	779		45
168	349	H153	-3.82805	0.195623	1	1	7.11151e-05	4.33511e-05	5.72331e-05	636	771		46
169	350	H154	-3.66809	0.181188	1	1	6.09869e-06	2.72266e-06	4.41067e-06	685	787		47
170	351	H155	-3.63858	0.147811	1	1	3.35008e-06	2.82024e-06	3.08516e-06	767	788		48
171	352	H156	-3.56264	0.151024	1	1	1.63445e-05	1.33008e-05	1.48226e-05	759	781		49
172	353	H158	-3.66866	0.192411	1	1	3.56395e-06	1.5636e-06	2.56377e-06	649	789		50
173	354	H159	-4.76509	0.181054	1	1	7.14231e-05	6.10123e-05	6.62177e-05	687	769		51
174	355	H160	-3.61358	0.198835	1	1	5.10981e-05	4.83667e-05	4.97324e-05	616	773		52
175	356	H161	-3.60606	0.186717	1	1	3.82448e-05	2.80753e-05	3.316e-05	661	777		53
176	357	H163	-3.76433	0.168401	1	1	3.31987e-05	2.98228e-05	3.15107e-05	719	778		54
179	360	H166	-4.41847	0.170725	1	1	2.62655e-05	1.8883e-05	2.25743e-05	712	780		55
181	362	H170	-1.7677	0.194031	1	1	7.56256e-06	7.8143e-06	7.68843e-06	642	785		56
508	656	I295	-9.5021	0.370687	1	1	0.000118935	9.79216e-05	0.000108428	161	762		57
510	658	I297	-8.63689	0.325259	1	1	0.000143059	0.00010324	0.000123149	249	760		58
632	780	B49	-9.33297	0.336578	1	1	0.00267141	0.00213842	0.00240491	225	127		59
633	781	B50	-8.41171	0.365689	1	1	0.00291881	0.00237332	0.00264606	174	99		60
634	782	B51	-8.16998	0.346643	1	1	0.00275346	0.00219294	0.0024732	205	116		61
6	154	D6	-4.98257	0.14824	1	2	0.000226282	0.00018989	0.000208086	765	735		62
7	155	D7	-6.0572	0.181363	1	2	0.000400242	0.000279464	0.000339853	682	586		63
8	156	D8	-4.91208	0.159414	1	2	0.000290888	0.000244013	0.00026745	740	684		64
26	174	D26	-5.38294	0.196039	1	2	0.000478444	0.00031142	0.000394932	634	531		65
27	175	D27	-5.23049	0.192351	1	2	0.00042394	0.000277397	0.000350669	651	570		66
28	176	D28	-5.43914	0.18722	1	2	0.000315146	0.000198924	0.000257035	660	697		67
29	177	D29	-5.1053	0.196326	1	2	0.000356449	0.000268997	0.000312723	628	625		68
511	659	I301	-8.44765	0.370605	1	2	1.45627e-05	4.73377e-06	9.64823e-06	162	784		69
512	660	I302	-7.86683	0.382601	1	2	2.08471e-05	5.14234e-06	1.29947e-05	144	782		70
513	661	I303	-6.71682	0.368151	1	2	7.6372e-06	4.5676e-06	6.1024e-06	170	786		71
515	663	I305	-7.12001	0.332291	1	2	1.64728e-06	3.59686e-07	1.00348e-06	237	790		72
517	665	I307	-5.18372	0.308714	1	2	1.12267e-06	2.62308e-07	6.92489e-07	276	791		73
588	736	B1	-6.7557	0.200917	2	2	0.00040541	0.000379348	0.000392379	608	534		74
589	737	B2	-6.50645	0.193319	2	2	0.000388231	0.000362439	0.000375335	644	549		75
590	738	B3	-6.8512	0.237272	2	2	0.000474317	0.000520328	0.000497322	487	443		76
603	751	B20	-9.76231	0.291334	2	2	0.000634059	0.00060459	0.000619325	317	362		77
604	752	B21	-9.06924	0.336041	2	2	0.000720521	0.000688562	0.000704541	227	333		78
605	753	B22	-8.16492	0.269384	2	2	0.00059955	0.000570931	0.000585241	387	388		79
606	754	B23	-7.81943	0.25032	2	2	0.000491525	0.000537171	0.000514348	446	435		80
607	755	B24	-7.16585	0.22192	2	2	0.000439833	0.000486605	0.000463219	539	462		81
608	756	B25	-6.06415	0.181648	2	2	0.000369283	0.000345537	0.00035741	680	565		82
609	757	B26	-8.89126	0.284689	2	2	0.000616799	0.000587771	0.000602285	337	377		83
610	758	B27	-7.56717	0.224881	2	2	0.000439833	0.000486605	0.000463219	527	462		84
611	759	B28	-7.39591	0.358169	2	2	0.000755145	0.000722117	0.000738631	187	328		85
612	760	B29	-6.63447	0.210834	2	2	0.000422625	0.000396232	0.000409428	568	507		86
613	761	B30	-9.63034	0.352133	2	2	0.000737823	0.000705348	0.000721586	198	330		87
614	762	B31	-8.06322	0.281055	2	2	0.000616799	0.000587771	0.000602285	348	377		88
615	763	B32	-7.79461	0.300728	2	2	0.000651339	0.000621405	0.000636372	296	352		89
616	764	B33	-6.48485	0.240516	2	2	0.000474317	0.000520328	0.000497322	473	443		90
617	765	B34	-10.5751	0.347117	2	2	0.000737823	0.000705348	0.000721586	204	330		91
618	766	B35	-8.61023	0.256022	2	2	0.00050877	0.00055402	0.000531395	423	425		92
619	767	B36	-8.41286	0.250322	2	2	0.000491525	0.000537171	0.000514348	445	435		93
620	768	B37	-7.29122	0.306332	2	2	0.000668587	0.000638189	0.000653388	283	347		94
621	769	B38	-6.68785	0.200171	2	2	0.00040541	0.000379348	0.000392379	612	534		95
622	770	B39	-5.93223	0.396913	2	2	0.000824494	0.000789108	0.000806801	122	318		96
623	771	B40	-9.39556	0.334958	2	2	0.000703217	0.000671782	0.0006875	231	337		97
624	772	B41	-8.24255	0.25843	2	2	0.00050877	0.00055402	0.000531395	417	425		98
625	773	B42	-6.86548	0.209402	2	2	0.000422625	0.000396232	0.000409428	579	507		99
626	774	B43	-9.56096	0.471774	2	2	0.000946063	0.000906011	0.000926037	48	288		100
627	775	B44	-9.03258	0.42912	2	2	0.000876566	0.000839271	0.000857919	87	301		101
628	776	B45	-8.59291	0.414321	2	2	0.000841847	0.000805841	0.000823844	97	312		102
629	777	B46	-8.06605	0.251963	2	2	0.000491525	0.000537171	0.000514348	436	435		103
630	778	B47	-9.28391	0.300584	2	2	0.000651339	0.000621405	0.000636372	297	352		104
631	779	B48	-7.24838	0.215378	2	2	0.000439833	0.000486605	0.000463219	550	462		105
635	783	B52	-8.29048	0.305991	2	2	0.000668587	0.000638189	0.000653388	285	347		106
636	784	B53	-5.79424	0.207662	2	2	0.000422625	0.000396232	0.000409428	589	507		107
509	657	I296	-8.74304	0.421585	1	4	0.000323761	0.000174603	0.000249182	92	702		108
730	76	R87	-8.21023	0.250827	2	6	0.00442099	0.00305286	0.00373692	441	52		109
107	288	H62	-3.85136	0.125334	1	6	0.00043382	0.000407857	0.000420839	795	500
115	296	H70	-1.03538	0.410879	1	6	0.00135154	0.00125021	0.00130087	103	230
116	297	H71	-1.29365	0.373071	1	6	0.00122775	0.00114674	0.00118724	155	247
122	303	H77	-2.54477	0.147024	1	6	0.000492326	0.000462725	0.000477525	768	454
123	304	H78	-1.1649	0.443386	1	6	0.00144923	0.00132335	0.00138629	71	221
124	305	H80	-0.80454	0.273032	1	6	0.000922698	0.000883599	0.000903149	373	295
519	667	M1	-5.42027	0.184501	4	6	0.00046046	0.000436857	0.000448659	669	472
520	668	M2	-4.05234	0.147834	4	6	0.000200755	0.00017636	0.000188558	766	745
521	669	M3	-5.84819	0.251307	4	6	0.000291866	0.000268559	0.000280213	439	669
522	670	M4	-6.00756	0.179609	4	6	0.000228179	0.000203848	0.000216013	694	729
523	671	M5	-4.78226	0.15429	4	6	0.000394011	0.000370686	0.000382348	752	544
524	672	M6	-6.17472	0.183394	4	6	0.00046046	0.000436857	0.000448659	673	472
525	673	M7	-5.7135	0.18852	4	6	0.000215627	0.0001924	0.000204013	657	737
526	674	M8	-4.5861	0.232715	4	6	0.000334367	0.000357657	0.000346012	508	576
527	675	M9	-5.42581	0.176966	4	6	0.000228179	0.000203848	0.000216013	698	729
528	676	M10	-5.92119	0.243305	4	6	0.000347165	0.000370476	0.00035882	468	564
529	677	M11	-5.25076	0.304526	4	6	0.000337601	0.000314455	0.000326028	289	610
530	678	M12	-5.91273	0.18218	4	6	0.000228179	0.000203848	0.000216013	678	729
531	679	M13	-8.38361	0.249057	4	6	0.00026291	0.000238546	0.000250728	451	700
532	680	M14	-10.4128	0.314504	4	6	0.000285687	0.000313838	0.000299763	264	637
533	681	M15	-11.5078	0.387254	4	6	0.000925819	0.000899393	0.000912606	135	291
534	682	M16	-11.4804	0.471906	4	6	0.000491306	0.000470994	0.00048115	47	451
535	683	M17	-12.8774	0.396732	4	6	0.000429042	0.000406674	0.000417858	124	502
536	684	M18	-12.4668	0.38476	4	6	0.000526228	0.000550193	0.000538211	140	421
537	685	M19	-8.80001	0.439882	4	6	0.000393835	0.000418931	0.000406383	75	512
538	686	M20	-10.5391	0.415199	4	6	0.00172667	0.00163583	0.00168125	95	188
539	687	M21	-11.1279	0.406656	4	6	0.000969662	0.000943569	0.000956616	107	281
540	688	M22	-10.6854	0.434958	4	6	0.000454744	0.000434183	0.000444463	79	475
541	689	M23	-11.3505	0.358727	4	6	0.000392482	0.000369897	0.000381189	184	545
542	690	M24	-10.9808	0.391442	4	6	0.000538989	0.000563022	0.000551005	132	410
543	691	M25	-9.72168	0.482313	4	6	0.00112547	0.00109754	0.00111151	42	256
544	692	M26	-11.591	0.414563	4	6	0.000969662	0.000943569	0.000956616	96	281
545	693	M27	-11.8631	0.368546	4	6	0.000881122	0.000855383	0.000868253	168	298
546	694	M28	-11.2567	0.367429	4	6	0.000401614	0.000379079	0.000390347	172	537
547	695	M29	-11.4805	0.367748	4	6	0.000401614	0.000379079	0.000390347	171	537
548	696	M30	-10.9694	0.354243	4	6	0.000487855	0.000511686	0.000499771	192	442
549	697	M31	-11.6601	0.405164	4	6	0.000969662	0.000943569	0.000956616	109	281
550	698	M32	-12.8904	0.433169	4	6	0.00176465	0.00167309	0.00171887	82	182
551	699	M33	-13.0458	0.411447	4	6	0.00168865	0.00159859	0.00164362	102	193
552	700	M34	-13.1488	0.390618	4	6	0.000925819	0.000899393	0.000912606	133	291
553	701	M35	-12.9298	0.395319	4	6	0.000947797	0.000921377	0.000934587	128	286
554	702	M36	-12.3733	0.420901	4	6	0.000445626	0.000425025	0.000435326	93	485
555	703	M37	-12.502	0.374645	4	6	0.000881122	0.000855383	0.000868253	151	298
556	704	M38	-13.1479	0.431783	4	6	0.00176465	0.00167309	0.00171887	84	182
557	705	M39	-12.8801	0.461362	4	6	0.00262759	0.00258191	0.00260475	53	102
558	706	M40	-12.6356	0.431619	4	6	0.00176465	0.00167309	0.00171887	85	182
559	707	M41	-13.2262	0.395567	4	6	0.00165062	0.00156138	0.001606	127	197
560	708	M42	-12.9495	0.402766	4	6	0.000947797	0.000921377	0.000934587	112	286
561	709	M43	-9.15462	0.351526	4	6	0.000345938	0.000317942	0.00033194	199	603
562	710	M49	-9.84113	0.333009	4	6	0.000301831	0.000329202	0.000315517	236	623
563	711	M50	-11.7937	0.369991	4	6	0.00153657	0.00144972	0.00149314	163	214
564	712	M51	-12.3825	0.385723	4	6	0.000925819	0.000899393	0.000912606	137	291
565	713	M52	-11.9987	0.396403	4	6	0.000429042	0.000406674	0.000417858	126	502
566	714	M53	-12.0597	0.401393	4	6	0.000429042	0.000406674	0.000417858	113	502
567	715	M54	-11.9084	0.399869	4	6	0.00055176	0.000575867	0.000563813	116	400
568	716	M55	-16.4826	0.579586	4	6	0.00168068	0.00171581	0.00169824	19	186
569	717	M56	-13.8964	0.423785	4	6	0.00114831	0.00117141	0.00115986	90	250
570	718	M57	-12.3982	0.371025	4	6	0.00114168	0.00115688	0.00114928	160	253
571	719	M58	-11.1862	0.38327	4	6	0.00143602	0.00144986	0.00144294	143	216
572	720	M59	-10.4611	0.368772	4	6	0.00174048	0.00173808	0.00173928	167	177
573	721	M60	-13.1182	0.394693	4	6	0.00106909	0.00109227	0.00108068	129	262
574	722	M61	-15.3958	0.458238	4	6	0.00125442	0.00127686	0.00126564	60	236
575	723	M62	-13.5219	0.429459	4	6	0.00132097	0.00133344	0.00132721	86	227
576	724	M63	-11.8614	0.362044	4	6	0.00136205	0.00137698	0.00136951	179	224
577	725	M64	-12.3058	0.366	4	6	0.00139916	0.00141335	0.00140625	173	219
578	726	M65	-11.1775	0.371665	4	6	0.00174048	0.00173808	0.00173928	159	177
579	727	M66	-13.5819	0.410551	4	6	0.00126114	0.00127456	0.00126785	104	235
580	728	M67	-13.3559	0.435301	4	6	0.00120153	0.00122411	0.00121282	78	242
581	729	M68	-14.7607	0.452583	4	6	0.00138075	0.00139226	0.00138651	65	220
582	730	M69	-13.011	0.411542	4	6	0.00154658	0.0015589	0.00155274	101	200
583	731	M70	-12.5945	0.442381	4	6	0.00167974	0.00166788	0.00167381	72	189
584	732	M71	-12.6619	0.397792	4	6	0.00187646	0.0018737	0.00187508	120	164
585	733	M72	-11.7731	0.35109	4	6	0.00108191	0.00109797	0.00108994	201	261
586	734	M73	-12.6482	0.379349	4	6	0.00104275	0.0010659	0.00105433	147	266
587	735	M74	-12.7697	0.383501	4	6	0.00114175	0.00109638	0.00111907	142	254
16	164	D16	-9.00945	0.474654	5	7	0.00494106	0.00348091	0.00421098	45	38
202	214	T21	-6.92958	0.20588	1	8	0.000956427	0.000731753	0.00084409	594	304
204	216	T23	-5.90475	0.176876	1	8	0.000602004	0.000484457	0.00054323	699	417
205	217	T24	-5.65588	0.174592	1	8	0.000475351	0.000377412	0.000426381	705	495
208	220	T27	-5.91038	0.198862	1	8	0.000714065	0.000586296	0.00065018	615	349
207	219	T26	-7.02262	0.208693	2	9	0.000762001	0.000601031	0.000681516	584	341
212	224	T31	-10.7937	0.57631	2	9	0.00191843	0.00154585	0.00173214	20	180
177	358	H164	-4.88333	0.190542	12	12	0.00013012	0.000137705	0.000133913	654	756
178	359	H165	-4.45325	0.173532	12	12	0.000120987	0.000126966	0.000123976	707	757
180	361	H167	-4.77787	0.16622	12	12	0.000120987	0.000126966	0.000123976	723	757
155	336	H132	-3.21545	0.131387	13	13	0.000104829	8.54617e-05	9.51453e-05	785	766
156	337	H133	-3.95099	0.164466	13	13	0.000149253	0.000140692	0.000144973	729	752
157	338	H134	-4.09159	0.145354	13	13	0.000109283	0.000137459	0.000123371	771	759
164	345	H148	-6.30701	0.189989	13	13	0.000128862	0.000156425	0.000142643	655	754
166	347	H150	-5.68183	0.186151	13	13	0.000126396	0.000104511	0.000115454	664	761
189	201	T8	-7.70512	0.347811	6	15	0.00243374	0.00205767	0.00224571	203	136
196	208	T15	-7.48313	0.348294	6	15	0.00187616	0.00159209	0.00173412	202	179
2	150	D2	-9.11001	0.47455	1	18	0.0028809	0.00156441	0.00222266	46	140
3	151	D3	-9.78785	0.444046	6	20	0.00276446	0.00205692	0.00241069	70	125
591	739	B4	-5.17466	0.258529	1	28	0.00284605	0.00327625	0.00306115	416	81
592	740	B5	-5.00774	0.267988	1	28	0.00303746	0.00327625	0.00315686	390	72
593	741	B6	-5.32975	0.160453	1	28	0.00185562	0.00197278	0.0019142	737	163
594	742	B7	-4.76262	0.319325	1	28	0.00569804	0.00408152	0.00488978	258	32
595	743	B8	-4.84871	0.332023	1	28	0.00569804	0.00428551	0.00499178	238	30
596	744	B9	-6.6324	0.225227	1	28	0.00371926	0.00321959	0.00346942	526	61
597	745	B12	-6.6369	0.200178	1	28	0.00225892	0.00248383	0.00237138	611	129
598	746	B13	-7.15535	0.346172	1	28	0.00378201	0.00438428	0.00408314	207	40
599	747	B14	-5.39419	0.381584	1	28	0.00706112	0.0046806	0.00587086	145	22
600	748	B15	-7.37715	0.290052	1	28	0.00488098	0.00387327	0.00437712	322	36
601	749	B18	-6.5993	0.223324	1	28	0.00245695	0.00274442	0.00260069	531	103
602	750	B19	-5.07265	0.620107	1	28	0.0131216	0.00672496	0.00992328	12	4
42	190	D42	-14.6264	0.764318	2	29	0.00928699	0.0146438	0.0119654	5	2
43	191	D43	-12.173	0.661642	2	29	0.00459319	0.00559851	0.00509585	8	29
183	195	T2	-9.41547	0.468665	1	32	0.00479598	0.00318613	0.00399106	50	45
201	213	T20	-6.25081	0.1861	1	32	0.0014705	0.0011649	0.0013177	665	229
203	215	T22	-6.16565	0.186637	1	32	0.00185223	0.00157696	0.0017146	662	185
787	133	R148	-7.0099	0.271278	2	33	0.000993354	0.00119965	0.0010965	379	259
788	134	R150	-7.71472	0.276315	2	33	0.000995578	0.00120238	0.00109898	362	258
789	135	R151	-7.68066	0.272227	2	33	0.000993354	0.00119965	0.0010965	376	259
236	384	I22	-6.86829	0.246191	2	33	0.00107428	0.000937948	0.00100611	458	273
237	385	I23	-6.0745	0.2098	2	33	0.0008483	0.000769888	0.000809094	576	315
238	386	I24	-6.65852	0.209878	2	33	0.0008483	0.000769888	0.000809094	574	315
239	387	I25	-9.27902	0.315945	2	33	0.00139653	0.00116025	0.00127839	262	234
240	388	I26	-8.14312	0.248564	2	33	0.00130157	0.00110375	0.00120266	452	245
1	149	D1	-9.60439	0.437377	1	42	0.00630166	0.00361849	0.00496007	77	31
46	227	H1	0.640755	0.513577	13	50	0.00139209	0.00127951	0.0013358	31	226
47	228	H2	-0.92936	0.35996	13	50	0.00100255	0.000944377	0.000973464	182	276
48	229	H3	-0.964875	0.212701	13	50	0.000589155	0.000578749	0.000583952	563	389
49	230	H4	0.33306	0.327848	13	50	0.00139542	0.00130685	0.00135114	243	225
50	231	H5	-0.213755	0.397657	13	50	0.00110494	0.00103446	0.0010697	121	265
51	232	H6	-6.29687	0.19078	13	50	0.000538238	0.000532903	0.000535571	653	423
53	234	H8	-7.03334	0.208896	13	50	0.000589155	0.000578749	0.000583952	583	389
54	235	H9	0.576485	0.306244	13	50	0.000876243	0.000807769	0.000842006	284	305
55	236	H10	0.87329	0.33506	13	50	0.00095177	0.000899117	0.000925443	230	289
56	237	H11	-0.31619	0.276294	13	50	0.000835464	0.000833589	0.000834526	363	308
57	238	H12	-1.40793	0.288128	13	50	0.000858667	0.00085702	0.000857844	326	302
58	239	H13	-0.061115	0.308189	13	50	0.000905724	0.000904445	0.000905084	277	294
59	240	H14	-2.51865	0.181192	13	50	0.00057745	0.000558066	0.000567758	684	398
60	241	H15	-1.81471	0.407856	13	50	0.00175314	0.00158849	0.00167081	106	192
61	242	H16	-1.28105	0.235465	13	50	0.000745139	0.000742423	0.000743781	493	327
62	243	H17	-7.60082	0.226372	13	50	0.000677808	0.000694559	0.000686183	524	339
63	244	H18	-4.30061	0.129769	13	50	0.000346133	0.000344978	0.000345556	788	578
64	245	H19	-8.16135	0.244922	13	50	0.000599285	0.000572986	0.000586135	462	387
65	246	H20	-1.78837	0.11255	13	50	0.000350553	0.000374723	0.000362638	800	560
66	247	H21	0.1699	0.335559	13	50	0.000988846	0.00107383	0.00103134	228	268
67	248	H22	-1.43519	0.277074	13	50	0.000697767	0.000711277	0.000704522	360	334
68	249	H23	-3.30643	0.149098	13	50	0.000417804	0.000437147	0.000427476	762	492
69	250	H24	-3.49685	0.150348	13	50	0.000417804	0.000437147	0.000427476	761	492
70	251	H25	-3.22786	0.169271	13	50	0.000443089	0.000459182	0.000451136	718	469
71	252	H26	-3.15831	0.162947	13	50	0.000430325	0.0004481	0.000439212	735	481
72	253	H27	-3.19139	0.13416	13	50	0.000393713	0.000416278	0.000404996	780	514
73	254	H28	-3.34703	0.132983	13	50	0.000393713	0.000416278	0.000404996	781	514
74	255	H29	-3.22936	0.13255	13	50	0.000393713	0.000416278	0.000404996	783	514
75	256	H30	-3.52673	0.130007	13	50	0.000393713	0.000416278	0.000404996	787	514
76	257	H31	-4.1976	0.180536	13	50	0.000456092	0.00047078	0.000463436	692	461
77	258	H32	-4.04629	0.198684	13	50	0.000598135	0.000602604	0.000600369	617	379
78	259	H33	-4.43238	0.171846	13	50	0.000554747	0.000534291	0.000544519	710	416
79	260	H34	-0.278785	0.293518	13	50	0.00117582	0.00115348	0.00116465	315	249
80	261	H35	0.41576	0.423613	13	50	0.00121632	0.00114765	0.00118198	91	248
81	262	H36	-2.38481	0.13226	13	50	0.000416006	0.000375534	0.00039577	784	527
82	263	H37	-2.66301	0.157986	13	50	0.000484357	0.000446131	0.000465244	745	460
83	264	H38	-1.38481	0.231643	13	50	0.000650299	0.000610208	0.000630254	511	355
84	265	H39	-1.69665	0.234034	13	50	0.000650299	0.000610208	0.000630254	501	355
85	266	H40	-0.70117	0.455759	13	50	0.00186149	0.00172501	0.00179325	62	171
86	267	H41	-7.71849	0.23011	13	50	0.000650299	0.000610208	0.000630254	515	355
87	268	H42	-4.10267	0.122437	13	50	0.000358787	0.000328409	0.000343598	796	584
88	269	H43	-8.13034	0.243456	13	50	0.00100069	0.00102793	0.00101431	466	270
89	270	H44	-0.2489	0.325188	13	50	0.000997163	0.000948257	0.00097271	251	278
90	271	H45	-0.57146	0.333962	13	50	0.000997163	0.000948257	0.00097271	235	278
91	272	H46	-1.60324	0.319996	13	50	0.000576809	0.000635006	0.000605907	257	376
92	273	H47	-2.37824	0.298438	13	50	0.000712609	0.000695414	0.000704012	302	335
93	274	H48	-2.21395	0.262875	13	50	0.000652639	0.000637693	0.000645166	404	350
94	275	H49	-1.95249	0.305307	13	50	0.000570482	0.000629455	0.000599968	288	380
95	276	H50	-1.77711	0.336269	13	50	0.000799784	0.000817137	0.00080846	226	317
96	277	H51	-0.69365	0.441328	13	50	0.000806699	0.000839704	0.000823202	74	313
97	278	H52	0.34658	0.50544	13	50	0.00104614	0.00110355	0.00107485	32	263
98	279	H53	-0.72823	0.355195	13	50	0.000885088	0.000863375	0.000874232	189	296
99	280	H54	-1.71884	0.351217	13	50	0.00067774	0.000706142	0.000691941	200	336
100	281	H55	-2.75774	0.18505	13	50	0.00046267	0.000462464	0.000462567	668	465
101	282	H56	-2.55549	0.153962	13	50	0.000421111	0.000403169	0.00041214	753	506
102	283	H57	-3.10643	0.163882	13	50	0.000430514	0.00041377	0.000422142	731	498
103	284	H58	-2.1474	0.165037	13	50	0.000440696	0.000424962	0.000432829	726	487
104	285	H59	-2.38011	0.180705	13	50	0.000451443	0.000436577	0.00044401	690	477
105	286	H60	-1.82447	0.226017	13	50	0.000545038	0.000564027	0.000554533	525	405
106	287	H61	-3.46583	0.152704	13	50	0.00033146	0.000371893	0.000351676	756	569
108	289	H63	-2.89252	0.179356	13	50	0.000451443	0.000436577	0.00044401	696	477
109	290	H64	-6.22993	0.305828	13	50	0.000570482	0.000629455	0.000599968	286	380
110	291	H65	-1.4241	0.344176	13	50	0.00135346	0.00121009	0.00128177	211	232
111	292	H66	-0.34364	0.354424	13	50	0.000874685	0.00085319	0.000863938	191	300
112	293	H67	-0.472025	0.35924	13	50	0.000885088	0.000863375	0.000874232	183	296
113	294	H68	-1.5429	0.368887	13	50	0.000764717	0.000801688	0.000783203	166	324
114	295	H69	-1.84666	0.342784	13	50	0.000672493	0.000700635	0.000686564	215	338
117	298	H72	-1.08331	0.312521	13	50	0.000570482	0.000629455	0.000599968	269	380
118	299	H73	0.937755	0.452925	13	50	0.000813069	0.00084549	0.000829279	63	310
119	300	H74	-1.29478	0.400555	13	50	0.000782379	0.000817136	0.000799758	114	320
120	301	H75	-0.833685	0.392336	13	50	0.000775709	0.000811861	0.000793785	130	322
121	302	H76	-0.526165	0.412294	13	50	0.000788261	0.000822534	0.000805397	99	319
125	306	H81	-2.41302	0.301727	13	50	0.00143592	0.0015003	0.00146811	294	215
126	307	H82	-2.11226	0.233311	13	50	0.00106829	0.00116546	0.00111688	506	255
127	308	H83	-1.03125	0.479125	13	50	0.00175832	0.00179089	0.00177461	43	173
128	309	H84	-2.11658	0.253658	13	50	0.00121742	0.00127711	0.00124727	432	239
129	310	H85	-0.22447	0.405506	13	50	0.00150681	0.00154065	0.00152373	108	210
130	311	H86	-7.19274	0.213633	13	50	0.000979188	0.0010059	0.000992544	561	274
131	312	H87	-2.9115	0.0910333	13	50	0.00037997	0.000412585	0.000396277	801	526
132	313	H88	-7.38165	0.224014	13	50	0.00125676	0.00124658	0.00125167	529	238
133	314	H89	-0.406605	0.284538	13	50	0.00134797	0.00141081	0.00137939	338	222
134	315	H90	0.559925	0.5414	13	50	0.00251496	0.00257288	0.00254392	27	111
135	316	H91	-0.65718	0.396767	13	50	0.00218434	0.0022796	0.00223197	123	138
136	317	H92	-0.65455	0.41714	13	50	0.0011775	0.00112221	0.00114985	94	252
137	318	H93	-1.28181	0.337777	13	50	0.00149668	0.00150287	0.00149978	222	212
138	319	H94	-2.19459	0.214751	13	50	0.000637209	0.000599942	0.000618576	555	364
139	320	H95	-2.15944	0.284448	13	50	0.000814604	0.000774555	0.00079458	339	321
140	321	H96	-2.34873	0.255724	13	50	0.00076352	0.000724611	0.000744065	425	326
141	322	H97	-1.64703	0.290138	13	50	0.00123616	0.00117288	0.00120452	321	244
142	323	H98	-0.082175	0.399516	13	50	0.00112504	0.00107338	0.00109921	117	257
143	324	H99	0.507305	0.387961	13	50	0.00109873	0.00104896	0.00107384	134	264
144	325	H100	0.02628	0.458527	13	50	0.00131716	0.00124007	0.00127861	58	233
145	326	H101	-2.22862	0.365076	13	50	0.00176033	0.00158203	0.00167118	176	191
146	327	H102	-1.07616	0.22309	13	50	0.00111662	0.000979238	0.00104793	532	267
147	328	H103	0.25373	0.403707	13	50	0.00188517	0.00168803	0.0017866	111	172
148	329	H104	-2.1412	0.262658	13	50	0.00128277	0.00114565	0.00121421	405	241
149	330	H105	-2.08613	0.270821	13	50	0.00132969	0.00117981	0.00125475	383	237
150	331	H106	-5.55025	0.183442	13	50	0.000863337	0.000809833	0.000836585	672	307
151	332	H107	-2.10228	0.0905662	13	50	0.000260212	0.000231055	0.000245633	802	705
152	333	H108	-8.0482	0.251611	13	50	0.00154579	0.00152377	0.00153478	437	204
191	203	T10	-7.00832	0.279897	14	53	0.00299333	0.00278186	0.0028876	351	88
198	210	T17	-9.72449	0.530139	14	53	0.00220007	0.00187694	0.0020385	28	157
199	211	T18	-9.6976	0.584744	14	53	0.00224102	0.0014342	0.00183761	17	166
206	218	T25	-6.95757	0.259703	14	53	0.00166784	0.00132583	0.00149684	412	213
209	221	T28	-5.75192	0.231259	14	53	0.00104111	0.000890758	0.000965934	512	280
211	223	T30	-9.379	0.504524	14	53	0.00332024	0.002912	0.00311612	33	77
213	225	T32	-9.97337	0.477076	14	53	0.00139359	0.00101671	0.00120515	44	243
182	194	T1	-9.676	0.460246	14	54	0.0038938	0.00319592	0.00354486	56	57
188	200	T7	-6.89741	0.341144	14	54	0.00158024	0.00115931	0.00136977	216	223
190	202	T9	-8.08952	0.425443	14	54	0.00320502	0.00230526	0.00275514	89	95
197	209	T16	-7.93953	0.313382	14	54	0.00216863	0.00227477	0.0022217	265	141
200	212	T19	-6.61321	0.22309	14	54	0.00171973	0.00151729	0.00161851	533	195
210	222	T29	-3.96733	0.118019	14	54	0.00095856	0.000934625	0.000946592	798	285
13	161	D13	-5.81245	0.207999	14	58	0.00153646	0.00165575	0.00159611	587	198
14	162	D14	-5.76376	0.209293	14	58	0.00153646	0.00165575	0.00159611	581	198
33	181	D33	-4.8444	0.158158	14	58	0.0021314	0.00221574	0.00217357	744	145
184	196	T3	-9.77487	0.493234	18	59	0.00324985	0.00244636	0.00284811	38	90
195	207	T14	-7.70832	0.352863	18	59	0.00356732	0.00301814	0.00329273	196	68
185	197	T4	-7.63614	0.340801	18	60	0.0060529	0.00782975	0.00694132	217	14
192	204	T11	-6.73069	0.281634	18	60	0.00393577	0.00219564	0.00306571	345	80
4	152	D4	-9.27374	0.459842	14	63	0.00425815	0.00264548	0.00345181	57	62
186	198	T5	-8.30024	0.441708	18	72	0.00632926	0.00412276	0.00522601	73	27
194	206	T13	-6.7228	0.242255	18	72	0.00234372	0.00191617	0.00212995	470	150
34	182	D34	-5.81395	0.238174	18	73	0.00247173	0.0017838	0.00212777	483	151
24	172	D24	-8.72017	0.434855	18	87	0.00277071	0.00206159	0.00241615	80	124
713	59	R68	-3.8181	0.278712	18	135	0.00313157	0.0040714	0.00360149	355	55
25	173	D25	-4.09196	0.121603	18	135	0.00163752	0.00141591	0.00152672	797	208
44	192	D44	-8.72655	0.445623	5	162	0.00056354	0.000534575	0.000549057	68	411
45	193	D45	-8.43953	0.36443	5	162	0.00165305	0.00157174	0.00161239	178	196
637	785	X1	-7.79467	0.27037	5	162	0.000689439	0.000534575	0.000612007	384	368
638	786	X2	-6.28241	0.303576	5	162	0.000689439	0.000656418	0.000672928	291	343
639	787	X3	-7.40537	0.288771	5	162	0.000689439	0.000656418	0.000672928	324	343
640	788	X4	-5.86645	0.2306	5	162	0.00056354	0.000534575	0.000549057	513	411
641	789	X5	-5.69405	0.213808	5	162	0.00056354	0.000410962	0.000487251	560	448
642	790	X6	-6.67496	0.210229	5	162	0.00056354	0.000410962	0.000487251	573	448
643	791	X7	-7.78635	0.340402	5	162	0.000815661	0.000656418	0.000736039	218	329
644	792	X8	-5.63592	0.183197	5	162	0.00043797	0.000410962	0.000424466	676	497
645	793	X9	-6.407	0.264369	5	162	0.000689439	0.000534575	0.000612007	400	368
646	794	X10	-6.33792	0.271213	5	162	0.000689439	0.000534575	0.000612007	380	368
647	795	X11	-6.17814	0.308086	5	162	0.000689439	0.000656418	0.000672928	279	343
648	796	X12	-6.49504	0.283626	5	162	0.000689439	0.000534575	0.000612007	341	368
649	797	X13	-5.63805	0.210534	5	162	0.00056354	0.000410962	0.000487251	572	448
650	798	X14	-5.43075	0.230151	5	162	0.00056354	0.000534575	0.000549057	514	411
651	799	X15	-6.07679	0.263977	5	162	0.000689439	0.000534575	0.000612007	401	368
652	800	X16	-6.21673	0.279851	5	162	0.000689439	0.000534575	0.000612007	352	368
653	801	X17	-5.12249	0.155678	5	162	0.00043797	0.000287515	0.000362742	749	559
654	802	X18	-5.66295	0.233878	5	162	0.00056354	0.000534575	0.000549057	503	411
12	160	D12	-7.05005	0.278329	6	163	0.0010379	0.000624712	0.000831306	356	309
5	153	D5	-6.0572	0.181363	6	164	0.000738262	0.000551653	0.000644957	681	351
193	205	T12	-7.02749	0.30813	6	166	0.00238288	0.00194817	0.00216552	278	146
11	159	D11	-5.25305	0.171052	6	171	0.00106458	0.000881466	0.000973023	711	277
496	644	I282	-6.68109	0.200715	1	177	0.000102139	9.6656e-05	9.93975e-05	610	764
499	647	I285	-4.00725	0.132945	1	177	5.15214e-05	7.50557e-05	6.32885e-05	782	770
500	648	I286	-6.78017	0.224089	1	177	0.000110876	0.000101311	0.000106094	528	763
501	649	I287	-5.84368	0.174914	1	177	8.87833e-05	8.43432e-05	8.65633e-05	704	767
22	170	D22	-6.93182	0.282894	2	178	0.000480327	0.000475934	0.000478131	343	453
9	157	D9	-6.85005	0.258897	6	179	0.00252809	0.00186645	0.00219727	415	143
10	158	D10	-6.84366	0.250804	6	179	0.00238905	0.00179976	0.00209441	443	154
15	163	D15	-7.92336	0.352834	6	184	0.0038232	0.00336293	0.00359307	197	56
31	179	D31	-5.2692	0.310483	6	187	0.00522827	0.00404097	0.00463462	274	33
505	653	I291	-6.70015	0.233513	1	187	0.000287172	0.0002444	0.000265786	504	686
506	654	I292	-4.63184	0.229861	1	189	6.70998e-05	7.38987e-05	7.04992e-05	516	768
214	226	T33	-7.47298	0.343528	19	215	0.00601454	0.00642096	0.00621775	212	19
187	199	T6	-7.52147	0.412907	19	216	0.00480369	0.00421999	0.00451184	98	34
35	183	D35	-5.788	0.337296	19	217	0.00137254	0.0012754	0.00132397	224	228
36	184	D36	-5.26563	0.242958	19	217	0.00098935	0.000905883	0.000947617	469	284
662	8	R12	-5.3226	0.170493	20	218	0.00073532	0.000694006	0.000714663	714	332
17	165	D17	-6.15568	0.26742	19	233	0.00193926	0.00173666	0.00183796	391	165
18	166	D18	-6.9632	0.343079	19	233	0.00252789	0.00220232	0.00236511	213	130
276	424	I62	-5.91231	0.285052	2	257	0.000629483	0.000497281	0.000563382	334	402
277	425	I63	-7.54274	0.232602	2	257	0.000415432	0.000394869	0.000405151	509	513
278	426	I64	-7.89795	0.236563	2	257	0.000454915	0.000420741	0.000437828	491	484
279	427	I65	-10.431	0.353906	2	257	0.000661547	0.000571592	0.000616569	193	366
678	24	R32	-4.73012	0.141952	36	337	0.003484	0.00387891	0.00368146	773	53
263	411	I49	-8.31699	0.263804	2	585	0.000627084	0.000602127	0.000614606	402	367
266	414	I52	-8.01036	0.269413	2	585	0.000649474	0.00060595	0.000627712	386	359
272	420	I58	-7.34646	0.219539	2	585	0.000553874	0.000519444	0.000536659	542	422
273	421	I59	-7.9243	0.237044	2	585	0.000566535	0.00053576	0.000551148	489	409
274	422	I60	-8.32261	0.255656	2	585	0.000721954	0.000636209	0.000679081	426	342
264	412	I50	-6.4356	0.228856	2	588	0.000627453	0.000591646	0.000609549	518	374
267	415	I53	-6.97623	0.207482	2	588	0.00054021	0.000510269	0.000525239	591	430
498	646	I284	-6.33313	0.21847	2	638	0.000145632	0.000161288	0.00015346	545	750
738	84	R96	-7.72581	0.286359	2	640	0.000142824	0.000175697	0.00015926	331	748
502	650	I288	-6.13453	0.298395	2	640	0.000311376	0.000293776	0.000302576	303	635
503	651	I289	-6.99746	0.215089	2	640	0.00023046	0.000205429	0.000217945	552	724
504	652	I290	-9.66384	0.290829	2	640	0.000304758	0.00027997	0.000292364	319	647
497	645	I283	-4.20082	0.164676	3	1503	0.000219985	0.000235279	0.000227632	728	721
19	167	D19	-7.69704	0.3694	6	1784	0.00161044	0.00140635	0.0015084	164	211
260	408	I46	-6.79588	0.212189	4	2277	0.00033955	0.000338723	0.000339136	565	588
261	409	I47	-6.42687	0.196831	4	2277	0.000337975	0.000318993	0.000328484	624	604
265	413	I51	-7.42216	0.222255	4	2277	0.000361248	0.000337822	0.000349535	536	573
268	416	I54	-6.79552	0.207512	4	2277	0.000369501	0.000356038	0.000362769	590	558
269	417	I55	-6.60499	0.196182	4	2277	0.000335422	0.000317773	0.000326597	631	607
270	418	I56	-6.62414	0.198323	4	2277	0.000333639	0.000316931	0.000325285	619	612
271	419	I57	-7.15685	0.212624	4	2277	0.000335174	0.000336173	0.000335673	564	595
275	423	I61	-6.85211	0.205053	4	2277	0.000334638	0.000340869	0.000337753	595	591
262	410	I48	-6.59812	0.196164	4	2280	0.000407688	0.000350913	0.000379301	632	547
518	666	I308	-5.21849	0.311945	1	2488	0.000608918	0.000390866	0.000499892	270	441
514	662	I304	-3.84479	0.25633	1	2490	0.000289506	0.000277008	0.000283257	422	665
516	664	I306	-5.4999	0.567726	1	2492	0.00124107	0.000783629	0.00101235	22	271
739	85	R97	-5.10684	0.156821	2	2651	0.000235754	0.000254857	0.000245305	748	707
790	136	R156	-14.5918	0.797793	17	2790	0.00149613	0.0015797	0.00153791	3	203
793	139	R159	-18.1538	1.0267	17	2790	0.00101472	0.00103691	0.00102582	1	269
796	142	R162	-13.761	0.706383	17	2790	0.00872014	0.0108923	0.00980622	7	5
799	145	R168	-10.6042	0.316213	17	2790	0.000580259	0.000512698	0.000546478	261	415
230	378	I16	-4.97957	0.181222	17	2790	0.000197794	0.000258364	0.000228079	683	720
231	379	I17	-4.55494	0.196227	17	2790	0.000249415	0.00032457	0.000286992	629	660
336	484	I122	-4.80871	0.285797	17	2790	0.000276045	0.000224614	0.000250329	333	701
349	497	I135	-5.69328	0.181102	17	2790	0.000278733	0.000165137	0.000221935	686	722
365	513	I151	-9.64591	0.297126	17	2790	0.000342877	0.000394279	0.000368578	308	557
366	514	I152	-8.33857	0.247718	17	2790	0.000304135	0.000350582	0.000327358	454	605
367	515	I153	-5.73219	0.220992	17	2790	0.000282475	0.000326098	0.000304287	540	633
368	516	I154	-8.01357	0.242254	17	2790	0.00029725	0.000343246	0.000320248	471	619
369	517	I155	-9.17858	0.273909	17	2790	0.000319382	0.000367877	0.000343629	370	582
370	518	I156	-9.0235	0.288963	17	2790	0.000334839	0.000385429	0.000360134	323	563
371	519	I157	-6.03128	0.197818	17	2790	0.000270122	0.000309455	0.000289788	622	649
372	520	I158	-6.77433	0.202352	17	2790	0.000270122	0.000309455	0.000289788	604	649
373	521	I159	-5.30074	0.22729	17	2790	0.000288806	0.000334793	0.0003118	522	627
374	522	I160	-6.59375	0.196829	17	2790	0.000270122	0.000309455	0.000289788	625	649
375	523	I161	-6.55488	0.209523	17	2790	0.000276417	0.000317724	0.000297071	577	643
376	524	I162	-6.55051	0.194993	17	2790	0.000263238	0.00030124	0.000282239	638	667
377	525	I163	-6.33873	0.195624	17	2790	0.000270122	0.000309455	0.000289788	635	649
378	526	I164	-9.24973	0.275741	17	2790	0.000327008	0.00037664	0.000351824	366	568
379	527	I165	-6.16291	0.188223	17	2790	0.000263238	0.00030124	0.000282239	658	667
380	528	I166	-8.13289	0.266517	17	2790	0.000319382	0.000367877	0.000343629	394	582
381	529	I167	-11.6025	0.380126	17	2790	0.000421512	0.000480693	0.000451102	146	470
382	530	I168	-6.9882	0.208362	17	2790	0.00031658	0.000382779	0.000349679	586	572
383	531	I169	-6.62649	0.198275	17	2790	0.000308894	0.000360363	0.000334628	620	597
384	532	I170	-6.55506	0.198681	17	2790	0.000308894	0.000360363	0.000334628	618	597
385	533	I171	-7.87081	0.244061	17	2790	0.000337912	0.0004048	0.000371356	463	554
386	534	I172	-6.17103	0.183297	17	2790	0.000292314	0.000344576	0.000318445	674	621
387	535	I173	-6.17727	0.186163	17	2790	0.000298003	0.000354391	0.000326197	663	608
388	536	I174	-6.09189	0.199143	17	2790	0.000308894	0.000360363	0.000334628	614	597
389	537	I175	-6.09481	0.187435	17	2790	0.000298003	0.000354391	0.000326197	659	608
390	538	I176	-5.01813	0.249732	17	2790	0.00035422	0.000440909	0.000397564	448	525
391	539	I177	-9.86331	0.310573	17	2790	0.00035323	0.00043737	0.0003953	272	528
392	540	I178	-5.07055	0.196796	17	2790	0.000308894	0.000360363	0.000334628	626	597
393	541	I179	-10.5054	0.315399	17	2790	0.000391687	0.000381704	0.000386696	263	542
394	542	I180	-9.83804	0.293931	17	2790	0.000373991	0.000316872	0.000345432	314	579
395	543	I181	-9.23177	0.281676	17	2790	0.000475614	0.00042685	0.000451232	344	468
396	544	I182	-8.43677	0.253852	17	2790	0.000655233	0.000496413	0.000575823	431	395
397	545	I183	-11.5735	0.378708	17	2790	0.000378847	0.00042348	0.000401164	148	521
398	546	I184	-7.36273	0.280943	17	2790	0.000651444	0.000588675	0.00062006	349	361
399	547	I185	-8.80424	0.268914	17	2790	0.000472287	0.000432219	0.000452253	388	466
400	548	I186	-8.76923	0.260471	17	2790	0.000365601	0.000329101	0.000347351	408	574
401	549	I187	-9.22334	0.27406	17	2790	0.000364155	0.000312502	0.000338328	369	589
402	550	I188	-8.60982	0.265123	17	2790	0.000427172	0.000371049	0.00039911	399	522
403	551	I189	-6.98961	0.295902	17	2790	0.000453489	0.000408474	0.000430981	309	489
404	552	I190	-8.49708	0.263268	17	2790	0.000679857	0.000509492	0.000594674	403	383
405	553	I191	-5.34194	0.399324	17	2790	0.000418097	0.000352318	0.000385207	119	543
406	554	I192	-7.32989	0.281357	17	2790	0.000352593	0.00042572	0.000389156	346	540
407	555	I193	-5.1117	0.238586	17	2790	0.000293216	0.000246488	0.000269852	480	678
408	556	I194	-6.59245	0.206094	17	2790	0.00026215	0.000235251	0.0002487	593	703
409	557	I195	-6.58198	0.207964	17	2790	0.00026215	0.000235251	0.0002487	588	703
410	558	I196	-8.13698	0.271176	17	2790	0.000295561	0.000242718	0.00026914	381	680
411	559	I197	-5.44567	0.257513	17	2790	0.000447223	0.000455791	0.000451507	421	467
412	560	I198	-7.99083	0.240625	17	2790	0.000293216	0.000246488	0.000269852	472	678
413	561	I199	-7.96137	0.338844	17	2790	0.000505009	0.000502784	0.000503896	219	439
414	562	I200	-6.99482	0.321253	17	2790	0.000575189	0.00058794	0.000581565	255	392
415	563	I201	-7.48317	0.327755	17	2790	0.000486417	0.000491775	0.000489096	244	447
416	564	I202	-6.58261	0.385045	17	2790	0.000545954	0.000539051	0.000542502	139	420
417	565	I203	-6.61982	0.298804	17	2790	0.000297378	0.000323726	0.000310552	301	630
418	566	I204	-5.67939	0.252896	17	2790	0.000443278	0.000426924	0.000435101	435	486
419	567	I205	-5.52449	0.169817	17	2790	0.000268067	0.000351164	0.000309616	716	631
420	568	I206	-6.22601	0.250432	17	2790	0.000252059	0.000307344	0.000279701	444	670
421	569	I207	-4.78802	0.163455	17	2790	0.000253774	0.000266746	0.00026026	732	691
422	570	I208	-4.70024	0.148985	17	2790	0.000230383	0.000290864	0.000260623	763	690
423	571	I209	-6.31371	0.358397	17	2790	0.000499304	0.000453764	0.000476534	186	456
424	572	I210	-9.76645	0.330167	17	2790	0.0006845	0.000639619	0.000662059	240	346
425	573	I211	-6.1181	0.182162	17	2790	0.000295826	0.000302253	0.00029904	679	638
426	574	I212	-5.56317	0.165237	17	2790	0.000287565	0.000291159	0.000289362	725	653
427	575	I213	-6.66728	0.201775	17	2790	0.000185974	0.000212606	0.00019929	606	740
428	576	I214	-6.06757	0.180234	17	2790	0.00029893	0.000350011	0.00032447	693	614
429	577	I215	-6.00286	0.193488	17	2790	0.000312761	0.000360589	0.000336675	643	594
430	578	I216	-5.70803	0.176746	17	2790	0.000532459	0.000603145	0.000567802	702	397
431	579	I217	-5.30265	0.167891	17	2790	0.000505539	0.000580411	0.000542975	721	419
432	580	I218	-7.13791	0.234868	17	2790	0.000198734	0.000228272	0.000213503	498	734
433	581	I219	-7.17225	0.214572	17	2790	0.000182553	0.00021783	0.000200192	556	738
434	582	I220	-4.87785	0.159194	17	2790	0.000157288	0.000184783	0.000171035	742	747
435	583	I221	-4.64397	0.13924	17	2790	0.000147236	0.000160774	0.000154005	775	749
436	584	I222	-4.27166	0.127075	17	2790	0.000144962	0.000155106	0.000150034	792	751
437	585	I223	-5.85325	0.181013	17	2790	0.000176313	0.000205015	0.000190664	688	741
438	586	I224	-4.99986	0.175111	17	2790	0.000176313	0.000205015	0.000190664	703	741
439	587	I225	-6.04986	0.238311	17	2790	0.000212957	0.000221861	0.000217409	482	725
440	588	I226	-6.14273	0.18248	17	2790	0.000176313	0.000205015	0.000190664	677	741
441	589	I227	-7.01232	0.46754	17	2790	0.000846069	0.00082758	0.000836824	52	306
442	590	I228	-8.35514	0.325232	17	2790	0.000247287	0.000288537	0.000267912	250	683
443	591	I229	-6.33219	0.274459	17	2790	0.000214324	0.000270314	0.000242319	368	709
444	592	I230	-8.479	0.404083	17	2790	0.00028619	0.000320687	0.000303439	110	634
445	593	I231	-6.56303	0.204594	17	2790	0.000191026	0.000218691	0.000204858	596	736
446	594	I232	-8.78448	0.265232	17	2790	0.000224792	0.000239786	0.000232289	398	718
447	595	I233	-8.73373	0.260013	17	2790	0.000213815	0.000269311	0.000241563	410	712
448	596	I234	-4.69665	0.184173	17	2790	0.000176313	0.000205015	0.000190664	670	741
449	597	I235	-8.88637	0.273449	17	2790	0.000214324	0.000270314	0.000242319	372	709
450	598	I236	-6.77524	0.237197	17	2790	0.000200266	0.000230511	0.000215389	488	732
451	599	I237	-4.58257	0.146872	17	2790	0.000235863	0.000291328	0.000263595	769	688
452	600	I238	-6.89875	0.227474	17	2790	0.000276727	0.000393188	0.000334957	520	596
453	601	I239	-9.12264	0.270969	17	2790	0.000214324	0.000270314	0.000242319	382	709
454	602	I240	-6.97883	0.208599	17	2790	0.000182553	0.00021783	0.000200192	585	738
455	603	I241	-9.13466	0.299234	17	2790	0.000245486	0.00026114	0.000253313	300	698
456	604	I242	-8.42527	0.258382	17	2790	0.000213815	0.000269311	0.000241563	418	712
457	605	I243	-5.06826	0.237016	17	2790	0.000200266	0.000230511	0.000215389	490	732
458	606	I244	-9.26231	0.276697	17	2790	0.000260719	0.000363941	0.00031233	361	626
459	607	I245	-9.23392	0.27458	17	2790	0.000224792	0.000239786	0.000232289	367	718
460	608	I246	-9.32114	0.278271	17	2790	0.00022328	0.000293271	0.000258275	357	693
461	609	I247	-5.12523	0.16399	17	2790	0.000236674	0.000299666	0.00026817	730	682
462	610	I248	-9.33881	0.279775	17	2790	0.00022328	0.000293271	0.000258275	353	693
463	611	I249	-9.44651	0.307418	17	2790	0.000336849	0.000342436	0.000339642	280	587
464	612	I250	-7.73897	0.302696	17	2790	0.000283567	0.000293484	0.000288525	292	656
465	613	I251	-6.33086	0.368533	17	2790	0.000510949	0.000593346	0.000552147	169	407
466	614	I252	-9.6044	0.295473	17	2790	0.000335227	0.000313553	0.00032439	310	615
467	615	I253	-9.64351	0.291256	17	2790	0.000347422	0.000343283	0.000345353	318	580
468	616	I254	-7.47713	0.234749	17	2790	0.000212441	0.00022114	0.00021679	499	726
469	617	I255	-9.71851	0.288652	17	2790	0.000361491	0.000441607	0.000401549	325	519
470	618	I256	-7.66944	0.233492	17	2790	0.000212441	0.00022114	0.00021679	505	726
471	619	I257	-6.59576	0.301904	17	2790	0.000400708	0.000484786	0.000442747	293	479
472	620	I258	-6.46285	0.223536	17	2790	0.000273647	0.000391531	0.000332589	530	602
473	621	I259	-7.83335	0.240409	17	2790	0.000280807	0.000394876	0.000337842	475	590
474	622	I260	-9.21775	0.277141	17	2790	0.000282088	0.000282538	0.000282313	359	666
475	623	I261	-7.84705	0.294688	17	2790	0.000361491	0.000441607	0.000401549	312	519
476	624	I262	-6.02466	0.253417	17	2790	0.000367309	0.000414962	0.000391135	433	536
477	625	I263	-6.65157	0.209474	17	2790	0.000277462	0.000272933	0.000275197	578	673
478	626	I264	-7.84179	0.271508	17	2790	0.000344544	0.00043384	0.000389192	378	539
479	627	I265	-7.9747	0.238104	17	2790	0.000279287	0.000276325	0.000277806	484	671
480	628	I266	-10.1178	0.334847	17	2790	0.000345647	0.000345477	0.000345562	233	577
481	629	I267	-7.98389	0.325541	17	2790	0.000245565	0.000297106	0.000271335	248	677
482	630	I268	-6.7542	0.204101	17	2790	0.000276907	0.000271863	0.000274385	600	674
483	631	I269	-7.72695	0.239171	17	2790	0.000279287	0.000276325	0.000277806	479	671
484	632	I270	-8.26024	0.304404	17	2790	0.00023091	0.00029845	0.00026468	290	687
485	633	I271	-10.5465	0.313239	17	2790	0.000231533	0.000300408	0.00026597	266	685
486	634	I272	-8.41304	0.291428	17	2790	0.000282827	0.000313132	0.000297979	316	642
487	635	I273	-10.7512	0.328442	17	2790	0.000319635	0.000320209	0.000319922	242	620
488	636	I274	-8.65216	0.277769	17	2790	0.00022328	0.000293271	0.000258275	358	693
489	637	I275	-10.9757	0.37261	17	2790	0.000263042	0.000334231	0.000298636	156	639
490	638	I276	-11.0219	0.458321	17	2790	0.000303449	0.00034075	0.0003221	59	617
491	639	I277	-9.01134	0.373953	17	2790	0.000263042	0.000334231	0.000298636	153	639
492	640	I278	-10.5537	0.353516	17	2790	0.0002588	0.000315109	0.000286955	194	661
493	641	I279	-11.3202	0.36519	17	2790	0.000263042	0.000334231	0.000298636	175	639
494	642	I280	-10.279	0.408066	17	2790	0.000372844	0.000417425	0.000395135	105	529
495	643	I281	-12.4845	0.432885	17	2790	0.000374784	0.000420589	0.000397687	83	524
223	371	I9	-8.23071	0.271558	18	2791	0.000490778	0.000373644	0.000432211	377	488
224	372	I10	-7.90251	0.234933	18	2791	0.000402447	0.000339816	0.000371131	497	555
226	374	I12	-8.14725	0.272714	18	2791	0.000600594	0.000485612	0.000543103	374	418
227	375	I13	-6.30758	0.192793	18	2791	0.000453714	0.000444738	0.000449226	647	471
232	380	I18	-4.46792	0.254226	18	2791	0.000641583	0.000596334	0.000618959	430	363
233	381	I19	-6.08447	0.183233	18	2791	0.000386365	0.000372153	0.000379259	675	548
234	382	I20	-6.66642	0.198204	18	2791	0.000501599	0.00045947	0.000480535	621	452
235	383	I21	-7.83071	0.243392	18	2791	0.000444214	0.000432374	0.000438294	467	482
215	363	I1	-5.63484	0.203411	18	2792	0.000851513	0.000706663	0.000779088	601	325
216	364	I2	-5.3166	0.203406	18	2792	0.0008565	0.000710196	0.000783348	602	323
217	365	I3	-5.21604	0.199712	18	2792	0.000547387	0.000495009	0.000521198	613	432
218	366	I4	-5.24499	0.220575	18	2792	0.000406766	0.000383284	0.000395025	541	530
219	367	I5	-4.95361	0.148678	18	2792	0.000614839	0.000519803	0.000567321	764	399
220	368	I6	-4.85194	0.249188	18	2792	0.000520886	0.000516374	0.00051863	450	433
221	369	I7	-4.74929	0.142358	18	2792	0.000344857	0.000323994	0.000334426	772	601
222	370	I8	-4.74911	0.202917	18	2792	0.000518459	0.000469261	0.00049386	603	445
225	373	I11	-7.78522	0.245579	18	2792	0.000430103	0.000403001	0.000416552	461	505
241	389	I27	-7.93926	0.235999	18	2792	0.000510164	0.000512065	0.000511114	492	438
242	390	I28	-5.82581	0.214014	18	2792	0.000411009	0.000464656	0.000437832	558	483
243	391	I29	-6.26474	0.326819	18	2792	0.000747898	0.000493369	0.000620633	245	360
244	392	I30	-5.27431	0.191787	18	2792	0.000393768	0.00041174	0.000402754	652	518
245	393	I31	-4.96924	0.312784	18	2792	0.00052809	0.000519191	0.000523641	268	431
246	394	I32	-4.67337	0.279185	18	2792	0.000508331	0.000549037	0.000528684	354	429
247	395	I33	-4.68804	0.373655	18	2792	0.00039908	0.00032394	0.00036151	154	561
248	396	I34	-4.3557	0.298171	18	2792	0.000531483	0.000571167	0.000551325	305	408
249	397	I35	-6.1121	0.255123	18	2792	0.00057357	0.000547162	0.000560366	429	403
250	398	I36	-6.08898	0.21823	18	2792	0.000556254	0.000601235	0.000578744	546	393
251	399	I37	-6.24162	0.281293	18	2792	0.00126897	0.00120971	0.00123934	347	240
252	400	I38	-5.55646	0.285017	18	2792	0.00055398	0.000563693	0.000558837	335	404
253	401	I39	-5.9965	0.231698	18	2792	0.000546009	0.000581388	0.000563699	510	401
254	402	I40	-5.15214	0.299844	18	2792	0.000622648	0.000636879	0.000629763	298	358
255	403	I41	-6.55513	0.194693	18	2792	0.000500361	0.0004873	0.00049383	639	446
256	404	I42	-5.20571	0.334906	18	2792	0.000483596	0.000395907	0.000439752	232	480
257	405	I43	-5.395	0.310519	18	2792	0.0005093	0.00055209	0.000530695	273	427
258	406	I44	-5.82657	0.287194	18	2792	0.000512828	0.000547101	0.000529965	329	428
259	407	I45	-5.73727	0.170501	18	2792	0.000395581	0.000420131	0.000407856	713	511
310	458	I96	-6.90704	0.298248	18	2792	0.000449645	0.000392057	0.000420851	304	499
311	459	I97	-5.73823	0.252897	18	2792	0.0003654	0.000267653	0.000316526	434	622
312	460	I98	-4.26002	0.326786	18	2792	0.000381059	0.000303831	0.000342445	246	585
313	461	I99	-4.61341	0.255959	18	2792	0.000361081	0.000288342	0.000324712	424	613
314	462	I100	-7.04139	0.250826	18	2792	0.000341967	0.000260778	0.000301373	442	636
315	463	I101	-5.38841	0.248206	18	2792	0.000328725	0.000255257	0.000291991	453	648
316	464	I102	-5.91756	0.306544	18	2792	0.000388837	0.000353093	0.000370965	282	556
317	465	I103	-4.37374	0.239727	18	2792	0.000262615	0.000224921	0.000243768	477	708
318	466	I104	-5.98895	0.214992	18	2792	0.000279349	0.000199131	0.00023924	553	714
319	467	I105	-6.19159	0.246672	18	2792	0.000306954	0.000230214	0.000268584	457	681
320	468	I106	-5.22938	0.192356	18	2792	0.000319044	0.000225367	0.000272205	650	676
321	469	I107	-4.7745	0.294601	18	2792	0.000318249	0.000268099	0.000293174	313	646
322	470	I108	-3.87713	0.361308	18	2792	0.00033187	0.00029743	0.00031465	181	624
323	471	I109	-5.87902	0.297449	18	2792	0.000359861	0.000313959	0.00033691	307	593
324	472	I110	-4.957	0.159525	18	2792	0.000261821	0.000181259	0.00022154	739	723
326	474	I112	-4.49254	0.2624	18	2792	0.000296056	0.000210429	0.000253242	406	699
327	475	I113	-5.41115	0.174487	18	2792	0.000278228	0.000193699	0.000235964	706	716
328	476	I114	-5.10495	0.255343	18	2792	0.000299917	0.000246516	0.000273217	427	675
332	480	I118	-5.30984	0.268283	18	2792	0.000314513	0.000252731	0.000283622	389	664
333	481	I119	-3.33953	0.343073	18	2792	0.000360898	0.00028586	0.000323379	214	616
334	482	I120	-3.03484	0.427521	18	2792	0.000382638	0.000322205	0.000352421	88	567
335	483	I121	-5.14405	0.275798	18	2792	0.000328116	0.000248591	0.000288353	365	658
337	485	I123	-5.23764	0.157304	18	2792	0.000255961	0.000176452	0.000216207	747	728
338	486	I124	-4.14499	0.309584	18	2792	0.000360442	0.000291505	0.000325973	275	611
339	487	I125	-4.5837	0.15935	18	2792	0.000267075	0.000223732	0.000245404	741	706
340	488	I126	-5.5495	0.284387	18	2792	0.000334274	0.000253714	0.000293994	340	644
341	489	I127	-4.89743	0.258978	18	2792	0.000301039	0.0002141	0.000257569	414	696
343	491	I129	-4.70625	0.180687	18	2792	0.000278504	0.000240882	0.000259693	691	692
352	500	I138	-5.00063	0.245959	18	2792	0.000346648	0.000227867	0.000287258	459	659
354	502	I140	-5.10908	0.204462	18	2792	0.000289993	0.000232525	0.000261259	597	689
359	507	I145	-4.55964	0.161248	18	2792	0.000256485	0.000214709	0.000235597	736	717
360	508	I146	-3.86491	0.399488	18	2792	0.00034971	0.000303936	0.000326823	118	606
361	509	I147	-3.5416	0.29066	18	2792	0.000320395	0.000267068	0.000293732	320	645
363	511	I149	-5.60456	0.169426	18	2792	0.0002772	0.000198289	0.000237745	717	715
798	144	R166	-8.05025	0.318348	19	2794	0.000431746	0.000463523	0.000447634	259	474
228	376	I14	-5.99424	0.200845	18	2794	0.00037733	0.000317084	0.000347207	609	575
229	377	I15	-3.80456	0.210593	18	2794	0.000457949	0.000326966	0.000392457	570	533
795	141	R161	-15.2646	0.844987	19	2816	0.00160762	0.0022598	0.00193371	2	161
791	137	R157	-10.9145	0.586411	20	2821	0.00613356	0.00795069	0.00704212	16	13
797	143	R163	-10.8385	0.456893	21	2879	0.00198948	0.00229286	0.00214117	61	149
309	457	I95	-9.68543	0.385178	18	2967	0.000549402	0.000520192	0.000534797	138	424
297	445	I83	-5.87877	0.285858	18	2981	0.000639207	0.000594164	0.000616686	332	365
298	446	I84	-5.49856	0.237274	18	2981	0.000631248	0.000582975	0.000607111	486	375
300	448	I86	-3.85963	0.20414	18	2981	0.000348809	0.00037341	0.00036111	599	562
303	451	I89	-6.40851	0.222821	18	2981	0.000375919	0.000367914	0.000371916	535	553
304	452	I90	-5.6149	0.297685	18	2981	0.000474189	0.000469177	0.000471683	306	458
305	453	I91	-5.61323	0.313089	18	2981	0.000870024	0.000829228	0.000849626	267	303
308	456	I94	-3.5226	0.17915	18	2981	0.000513049	0.000492518	0.000502783	697	440
344	492	I130	-4.6386	0.275953	18	2981	0.000670682	0.000693151	0.000681917	364	340
345	493	I131	-5.12827	0.383553	18	2981	0.00110601	0.000911177	0.00100859	141	272
346	494	I132	-4.43107	0.280686	18	2981	0.000868623	0.000779736	0.000824179	350	311
347	495	I133	-4.2555	0.228887	18	2981	0.000627671	0.000538456	0.000583063	517	391
325	473	I111	-3.8542	0.391887	19	3285	0.000471382	0.000416913	0.000444147	131	476
329	477	I115	-4.68635	0.335546	19	3285	0.000458209	0.000402821	0.000430515	229	491
330	478	I116	-4.46565	0.209066	19	3285	0.000385556	0.000314597	0.000350077	582	571
331	479	I117	-4.53032	0.18922	19	3285	0.000347776	0.000267017	0.000307396	656	632
342	490	I128	-3.77337	0.364531	19	3285	0.000452	0.000401113	0.000426556	177	494
362	510	I148	-5.91601	0.273718	19	3285	0.000414762	0.000344717	0.000379739	371	546
280	428	I66	-8.45725	0.265325	19	3426	0.000867332	0.000753923	0.000810627	397	314
287	435	I73	-9.44481	0.326503	19	3428	0.000461282	0.000399859	0.00043057	247	490
288	436	I74	-7.75546	0.247381	19	3428	0.000406901	0.000340106	0.000373504	455	552
792	138	R158	-10.8223	0.492506	21	3432	0.00215075	0.00253149	0.00234112	39	132
281	429	I67	-7.65703	0.227427	19	3446	0.00062356	0.000528809	0.000576184	521	394
289	437	I75	-7.17883	0.213215	19	3452	0.000639856	0.000547699	0.000593777	562	384
294	442	I80	-5.12543	0.154863	19	3458	0.000345013	0.000329185	0.000337099	750	592
291	439	I77	-5.68935	0.192885	18	3522	0.00064726	0.000538527	0.000592893	646	385
299	447	I85	-4.13858	0.130127	18	3542	0.000391959	0.000425677	0.000408818	786	510
717	63	R73	-8.12336	0.374286	41	3596	0.00672371	0.00993828	0.008331	152	8
348	496	I134	-5.30269	0.202297	19	3643	0.000332498	0.000236994	0.000284746	605	662
350	498	I136	-5.69817	0.17188	19	3643	0.000360858	0.000261462	0.00031116	709	629
351	499	I137	-5.66057	0.196744	19	3643	0.000332498	0.000236994	0.000284746	627	662
353	501	I139	-5.57035	0.166757	19	3643	0.000371903	0.00027173	0.000321817	722	618
355	503	I141	-4.63199	0.165325	19	3643	0.000360991	0.000261453	0.000311222	724	628
356	504	I142	-4.49309	0.134262	19	3643	0.000334219	0.000242956	0.000288588	779	655
357	505	I143	-5.01884	0.153393	19	3643	0.000336818	0.000239969	0.000288394	754	657
358	506	I144	-4.9837	0.152407	19	3643	0.000338076	0.00024053	0.000289303	757	654
290	438	I76	-5.01962	0.354464	19	3685	0.000967037	0.00100566	0.000986348	190	275
292	440	I78	-5.44516	0.164894	19	3816	0.000463684	0.000333148	0.000398416	727	523
301	449	I87	-3.21132	0.185115	18	3906	0.000518097	0.000512069	0.000515083	667	434
302	450	I88	-3.8241	0.129652	18	3906	0.000385077	0.000404265	0.000394671	789	532
306	454	I92	-4.007	0.127097	18	4085	0.000461695	0.000471728	0.000466711	791	459
307	455	I93	-3.89309	0.128035	18	4085	0.000570364	0.000572762	0.000571563	790	396
507	655	I293	-4.71001	0.185429	1	4244	0.000614062	0.00056297	0.000588516	666	386
286	434	I72	-5.6604	0.179495	20	4289	0.000500199	0.00045315	0.000476675	695	455
293	441	I79	-5.38107	0.160146	20	4289	0.000408388	0.000365983	0.000387186	738	541
296	444	I82	-5.43641	0.163361	20	4293	0.000380912	0.000369597	0.000375255	733	550
364	512	I150	-5.43641	0.163361	20	4293	0.000380912	0.000369597	0.000375255	734	550
295	443	I81	-6.97394	0.207441	19	4337	0.000509314	0.00043534	0.000472327	592	457
282	430	I68	-5.48972	0.168034	19	4341	0.000455443	0.000383698	0.000419571	720	501
283	431	I69	-2.31832	0.77603	20	4591	0.00122858	0.00107662	0.0011526	4	251
284	432	I70	-5.57374	0.176759	20	4591	0.000361389	0.000327503	0.000344446	701	581
285	433	I71	-6.23014	0.210554	20	5117	0.000967432	0.000881711	0.000924571	571	290
670	16	R24	-4.21619	0.217066	77	8048	0.00162827	0.00120187	0.00141507	548	218
671	17	R25	-9.30795	0.469032	77	8048	0.00246019	0.00264634	0.00255326	49	109
672	18	R26	-5.27091	0.158998	77	8048	0.0020261	0.00158861	0.00180736	743	170
673	19	R27	-6.17337	0.195499	77	8048	0.00173977	0.00151911	0.00162944	637	194
674	20	R28	-6.46755	0.201227	77	8048	0.00172077	0.00176895	0.00174486	607	176
675	21	R29	-4.66583	0.141131	77	8048	0.00201308	0.0019045	0.00195879	774	160
676	22	R30	-4.30606	0.146551	77	8048	0.00118216	0.00120939	0.00119578	770	246
677	23	R31	-5.54779	0.176838	77	8048	0.00121746	0.00138305	0.00130026	700	231
718	64	R74	-6.82488	0.214946	77	8048	0.00214146	0.00205459	0.00209802	554	153
719	65	R75	-6.44199	0.222044	77	8048	0.00226353	0.00205143	0.00215748	538	147
722	68	R79	-6.8059	0.284711	77	8048	0.00229131	0.00207616	0.00218374	336	144
724	70	R81	-6.94181	0.301236	77	8048	0.00170607	0.00175058	0.00172833	295	181
726	72	R83	-6.44876	0.337908	77	8048	0.00225633	0.00179638	0.00202636	221	159
727	73	R84	-8.36474	0.249645	77	8048	0.00175632	0.00134059	0.00154846	449	202
728	74	R85	-9.22997	0.286497	77	8048	0.00183071	0.00168436	0.00175753	330	174
729	75	R86	-6.0465	0.323982	77	8048	0.00185424	0.0016378	0.00174602	252	175
731	77	R88	-4.03801	0.126594	77	8048	0.00159336	0.00150717	0.00155026	793	201
732	78	R89	-5.97111	0.180933	77	8048	0.00187639	0.00174497	0.00181068	689	169
733	79	R90	-6.53805	0.323641	77	8048	0.00256648	0.00260749	0.00258698	253	104
743	89	R101	-9.167	0.272587	77	8048	0.00232011	0.00199023	0.00215517	375	148
744	90	R102	-8.29858	0.266405	77	8048	0.00159433	0.00174881	0.00167157	395	190
745	91	R103	-13.2587	0.528923	77	8048	0.00301294	0.00312041	0.00306668	29	79
746	92	R106	-7.81869	0.239321	77	8048	0.00173309	0.00133264	0.00153287	478	207
747	93	R107	-5.70721	0.255317	77	8048	0.00181056	0.00157625	0.0016934	428	187
750	96	R110	-9.69389	0.288	77	8048	0.00148028	0.00156818	0.00152423	327	209
751	97	R112	-7.62377	0.305714	77	8048	0.00141721	0.00165006	0.00153363	287	206
794	140	R160	-15.3146	0.733239	77	8048	0.00399799	0.00396109	0.00397954	6	46
800	146	R169	-7.81473	0.235322	77	8048	0.00145605	0.00161147	0.00153376	495	205
801	147	R170	-5.9	0.316228	77	8048	0.0073888	0.00683591	0.00711235	260	12
802	148	R171	-7.65985	0.238345	77	8048	0.00199022	0.00185551	0.00192287	481	162
689	35	R43	-8.4198	0.345776	78	8051	0.00327481	0.00354507	0.00340994	208	65
687	33	R41	-7.44253	0.329466	78	8052	0.00381507	0.00377662	0.00379584	241	49
686	32	R40	-8.5555	0.400154	79	8054	0.00382007	0.00403108	0.00392558	115	47
688	34	R42	-9.16529	0.411959	79	8054	0.00408689	0.00424472	0.0041658	100	39
655	1	R1	-4.29982	0.150663	230	12728	0.00247645	0.00269179	0.00258412	760	105
656	2	R3	-4.0978	0.261675	230	12728	0.00368007	0.00312379	0.00340193	407	66
657	3	R4	-5.00195	0.346572	230	12728	0.00349779	0.00358744	0.00354261	206	58
659	5	R6	-8.48033	0.320967	230	12728	0.0029593	0.00252574	0.00274252	256	96
663	9	R14	-8.5008	0.45287	230	12728	0.00416903	0.00351692	0.00384298	64	48
664	10	R15	-9.90191	0.553711	230	12728	0.00479131	0.0056193	0.00520531	25	28
665	11	R18	-11.2151	0.608919	230	12728	0.00579568	0.0061512	0.00597344	13	20
666	12	R19	-7.8587	0.330737	230	12728	0.00310614	0.00318215	0.00314415	239	73
668	14	R21	-10.6	0.491801	230	12728	0.00511613	0.00608338	0.00559975	40	23
669	15	R22	-9.05607	0.444148	230	12728	0.00613621	0.00675187	0.00644404	69	17
679	25	R33	-10.1858	0.46108	230	12728	0.00414638	0.00399763	0.00407201	55	42
680	26	R34	-6.57487	0.197093	230	12728	0.00203147	0.00215243	0.00209195	623	155
681	27	R35	-6.4931	0.192984	230	12728	0.00235108	0.00246503	0.00240806	645	126
682	28	R36	-7.89424	0.267097	230	12728	0.00307061	0.00321682	0.00314372	392	74
683	29	R37	-7.2354	0.222224	230	12728	0.00233415	0.00247291	0.00240353	537	128
684	30	R38	-7.10965	0.22641	230	12728	0.00282621	0.0022843	0.00255526	523	108
685	31	R39	-6.7213	0.218634	230	12728	0.00271746	0.00274547	0.00273146	544	97
690	36	R44	-7.34142	0.218121	230	12728	0.00305901	0.00282516	0.00294209	547	83
691	37	R45	-7.64988	0.243668	230	12728	0.0022948	0.00277757	0.00253618	465	112
692	38	R46	-10.0931	0.33831	230	12728	0.00344186	0.00340802	0.00342494	220	64
693	39	R47	-6.04894	0.240449	230	12728	0.00265204	0.00228642	0.00246923	474	118
694	40	R48	-5.99124	0.25959	230	12728	0.00320534	0.0030328	0.00311907	413	76
695	41	R49	-6.86229	0.210908	230	12728	0.0030522	0.00282718	0.00293969	567	84
696	42	R50	-11.1427	0.467728	230	12728	0.00387132	0.00416364	0.00401748	51	44
697	43	R51	-7.16755	0.213957	230	12728	0.00256642	0.00201241	0.00228941	559	135
698	44	R52	-7.22075	0.233924	230	12728	0.00227607	0.00266465	0.00247036	502	117
699	45	R53	-10.1807	0.372597	230	12728	0.00330586	0.00377283	0.00353935	157	59
700	46	R54	-9.71606	0.3219	230	12728	0.00317402	0.00335661	0.00326531	254	70
701	47	R55	-6.50195	0.23777	230	12728	0.00218546	0.00187012	0.00202779	485	158
702	48	R56	-7.1745	0.214101	230	12728	0.00208749	0.00209061	0.00208905	557	156
703	49	R57	-7.14705	0.234203	230	12728	0.00232499	0.0023291	0.00232704	500	133
704	50	R58	-6.18765	0.183893	230	12728	0.00243171	0.00271039	0.00257105	671	107
705	51	R59	-6.2602	0.209397	230	12728	0.0023891	0.0023111	0.0023501	580	131
706	52	R60	-9.3873	0.282984	230	12728	0.00236011	0.00209106	0.00222558	342	139
707	53	R61	-8.75835	0.260277	230	12728	0.00213168	0.00209653	0.0021141	409	152
708	54	R62	-6.8933	0.210789	230	12728	0.00192546	0.0017327	0.00182908	569	167
709	55	R63	-7.06435	0.20984	230	12728	0.00192546	0.0017327	0.00182908	575	167
710	56	R64	-7.0775	0.23507	230	12728	0.00261817	0.00226841	0.00244329	496	122
711	57	R65	-7.0948	0.211775	230	12728	0.00222213	0.00237676	0.00229944	566	134
712	58	R67	-5.0008	0.151722	230	12728	0.00247645	0.00269179	0.00258412	758	105
715	61	R71	-8.01265	0.369275	230	12728	0.00319287	0.00305375	0.00312331	165	75
716	62	R72	-11.3147	0.558215	230	12728	0.00622873	0.00687583	0.00655228	24	16
720	66	R76	-10.4267	0.56344	230	12728	0.0063635	0.00747097	0.00691724	23	15
734	80	R91	-7.85664	0.307403	230	12728	0.00285241	0.00300168	0.00292705	281	86
735	81	R93	-7.45664	0.269523	230	12728	0.00369716	0.00444997	0.00407357	385	41
736	82	R94	-4.40869	0.136778	230	12728	0.00319931	0.0022104	0.00270485	777	98
737	83	R95	-12.3387	0.581232	232	12728	0.0124136	0.0219893	0.0172015	18	1
741	87	R99	-7.9307	0.249867	230	12728	0.00237715	0.00208941	0.00223328	447	137
742	88	R100	-7.32299	0.247205	230	12728	0.00325422	0.00337258	0.0033134	456	67
748	94	R108	-7.38615	0.240287	230	12728	0.00296964	0.00295443	0.00296204	476	82
749	95	R109	-8.49517	0.361958	230	12728	0.0107806	0.0112099	0.0109952	180	3
752	98	R113	-3.65966	0.113275	230	12728	0.00347592	0.00292	0.00319796	799	71
753	99	R114	-4.95644	0.154717	230	12728	0.00292389	0.00323679	0.00308034	751	78
754	100	R115	-5.06005	0.157767	230	12728	0.00293673	0.00215423	0.00254548	746	110
755	101	R116	-6.16907	0.215515	230	12728	0.00280302	0.00277262	0.00278782	549	93
756	102	R117	-6.13099	0.228614	230	12728	0.00320595	0.00265777	0.00293186	519	85
757	103	R118	-6.57885	0.215254	230	12728	0.00238548	0.00246766	0.00242657	551	123
758	104	R119	-9.83235	0.461304	230	12728	0.00395564	0.0045583	0.00425697	54	37
759	105	R120	-6.99393	0.251033	230	12728	0.00287415	0.00236845	0.0026213	440	101
760	106	R121	-7.25942	0.265867	230	12728	0.00282486	0.00208711	0.00245598	396	121
761	107	R122	-10.8724	0.60451	230	12728	0.00685676	0.0078208	0.00733878	14	11
762	108	R123	-10.9243	0.635349	230	12728	0.00385334	0.00492275	0.00438805	10	35
763	109	R124	-11.3941	0.526093	230	12728	0.00348676	0.00355699	0.00352187	30	60
764	110	R125	-8.77291	0.434187	230	12728	0.00243157	0.00248644	0.00245901	81	120
765	111	R126	-7.5586	0.245921	230	12728	0.0020498	0.00238871	0.00221925	460	142
766	112	R127	-10.7735	0.543056	230	12728	0.00352788	0.00369719	0.00361254	26	54
767	113	R128	-7.6831	0.344736	230	12728	0.00276062	0.00294329	0.00285195	210	89
768	114	R129	-7.17986	0.266994	230	12728	0.00269045	0.00235722	0.00252384	393	113
769	115	R130	-6.85265	0.251353	230	12728	0.00270746	0.00280811	0.00275779	438	94
770	116	R131	-4.95673	0.17216	230	12728	0.00315519	0.00244592	0.00280055	708	92
771	117	R132	-9.53021	0.449544	230	12728	0.00391839	0.00356074	0.00373957	66	50
772	118	R133	-7.91957	0.333976	230	12728	0.00286877	0.00214984	0.0025093	234	114
773	119	R134	-7.50073	0.295184	230	12728	0.00264226	0.00236416	0.00250321	311	115
774	120	R135	-9.05838	0.337612	230	12728	0.00229475	0.00263479	0.00246477	223	119
775	121	R136	-9.7006	0.345188	230	12728	0.00293968	0.00268201	0.00281085	209	91
776	122	R137	-8.62021	0.353288	230	12728	0.0029724	0.00282901	0.0029007	195	87
777	123	R138	-10.6447	0.378193	230	12728	0.00322941	0.00330235	0.00326588	149	69
778	124	R139	-12.3186	0.648557	230	12728	0.00749425	0.00741605	0.00745515	9	10
779	125	R140	-12.1028	0.594704	230	12728	0.00553847	0.00542163	0.00548005	15	24
780	126	R141	-10.1981	0.496124	230	12728	0.00361723	0.00385783	0.00373753	37	51
781	127	R142	-11.0872	0.499898	230	12728	0.00535846	0.00551544	0.00543695	34	26
782	128	R143	-10.7966	0.498488	230	12728	0.00401616	0.00409449	0.00405533	35	43
783	129	R144	-10.1889	0.487938	230	12728	0.00346093	0.00339902	0.00342998	41	63
784	130	R145	-11.0165	0.57142	230	12728	0.00540515	0.00548982	0.00544749	21	25
785	131	R146	-6.71133	0.23319	230	12728	0.00261367	0.00266677	0.00264022	507	100
786	132	R147	-12.6873	0.62682	230	12728	0.00864406	0.0083014	0.00847273	11	7
714	60	R70	-8.17205	0.371885	233	12758	0.00552521	0.00626114	0.00589318	158	21
667	13	R20	-4.63349	0.196101	242	12772	0.00977824	0.0088636	0.00932092	633	6
660	6	R8	-5.37429	0.222844	238	12777	0.00590302	0.00668659	0.00629481	534	18
658	4	R5	-4.54966	0.152919	243	12797	0.00758494	0.00747712	0.00753103	755	9

## Sheet: Param_SA_Data
Parameter_Set	Mean_RMSD	Mean_Norm_RMSD	Mean_Sensitivity	Mean_PPV					Mean RMSD	1		Real	2
Flat_0+3	0.0220924	0.194799	85.6759	87.4722					Mean Normalized RMSD			Flat	Flat
Flat_0-3	0.0257501	0.235032	84.4787	83.5044					Mean Sensitivity
Flat_1+3	0.0275538	0.228637	84.2609	85.3001					Mean PPV
Flat_1-3	0.0277505	0.237914	84.0063	83.8566
Flat_10+3	0.02033	0.175966	87.8958	88.4373
Flat_10-3	0.0258753	0.223651	84.9498	84.7691
Flat_100+3	0.00518312	0.0494917	96.7367	96.9005
Flat_100-3	0.014886	0.134943	91.2417	91.5269
Flat_101+3	0.0174129	0.144359	90.8718	91.1531
Flat_101-3	0.0268948	0.221048	84.9052	85.7696
Flat_102+3	0.00516399	0.0498668	97.0859	97.3695
Flat_102-3	0.0149029	0.135367	90.7903	91.2847
Flat_103+3	0.00881953	0.0784314	95.3438	95.3227
Flat_103-3	0.0195518	0.166483	88.4795	89.2236
Flat_104+3	0.0158406	0.142062	90.0723	90.1705
Flat_104-3	0.0283144	0.238353	83.2755	84.1274
Flat_105+3	0.0118264	0.0999845	94.3464	94.5265
Flat_105-3	0.0218825	0.179556	88.395	89.3501
Flat_106+3	0.0201726	0.132173	92.7056	92.9236
Flat_106-3	0.020272	0.15422	91.1733	91.5469
Flat_107+3	0.00889606	0.0776577	95.0757	95.1769
Flat_107-3	0.0148096	0.128381	91.774	92.6498
Flat_108+3	0.0115277	0.0941704	94.328	94.309
Flat_108-3	0.018891	0.153574	90.2607	90.581
Flat_109+3	2.05253e-05	0.000196529	99.985	99.995
Flat_109-3	7.81745e-05	0.000814272	99.9691	99.968
Flat_11+3	0.0295904	0.243423	83.3532	84.6104
Flat_11-3	0.0283434	0.244489	83.5466	83.3167
Flat_110+3	2.21596e-05	0.000241844	99.9962	99.9952
Flat_110-3	7.04719e-05	0.0007522	99.9801	99.9756
Flat_111+3	6.73401e-05	0.0010077	99.961	99.9557
Flat_111-3	0.000146513	0.00163191	99.891	99.9177
Flat_112+3	6.77392e-05	0.000878983	99.9826	99.9708
Flat_112-3	9.88516e-05	0.00130472	99.9213	99.922
Flat_113+3	0.000288714	0.00263189	99.8753	99.8709
Flat_113-3	0.000237591	0.00257217	99.8238	99.8231
Flat_114+3	2.81748e-05	0.000298831	99.9811	99.988
Flat_114-3	5.71151e-05	0.000532588	99.9836	99.9954
Flat_115+3	6.79546e-05	0.000564779	99.9603	99.9655
Flat_115-3	9.67281e-05	0.00125318	99.9312	99.9399
Flat_116+3	6.95821e-05	0.000676902	99.9414	99.947
Flat_116-3	0.000204528	0.00205509	99.8248	99.8402
Flat_117+3	4.22076e-06	4.4484e-05	99.9988	99.9982
Flat_117-3	3.58709e-05	0.000357109	99.9814	99.9815
Flat_118+3	6.89133e-06	0.000136165	99.9917	99.9926
Flat_118-3	1.55306e-05	0.000223893	99.9925	99.9909
Flat_119+3	3.30618e-05	0.000383096	99.9709	99.9703
Flat_119-3	8.28863e-05	0.000859721	99.9593	99.9611
Flat_12+3	0.0220746	0.188845	87.123	87.693
Flat_12-3	0.0202314	0.18198	87.1402	87.6247
Flat_120+3	2.89079e-06	4.11472e-05	99.9996	99.9995
Flat_120-3	2.16459e-05	0.000230485	99.9919	99.9934
Flat_121+3	4.00165e-05	0.000474026	99.978	99.9774
Flat_121-3	0.000127846	0.00150035	99.9088	99.9352
Flat_122+3	0.000114565	0.00126619	99.9337	99.9238
Flat_122-3	0.000143994	0.00147745	99.9273	99.9275
Flat_123+3	5.73907e-05	0.000558527	99.9776	99.9772
Flat_123-3	0.000115293	0.000823411	99.9203	99.9288
Flat_124+3	8.66371e-05	0.000916902	99.9563	99.9553
Flat_124-3	0.000142168	0.00162721	99.9785	99.9793
Flat_125+3	4.65584e-05	0.000560946	99.9752	99.9804
Flat_125-3	0.000108764	0.00127448	99.901	99.9142
Flat_126+3	1.67241e-05	0.000191406	99.9791	99.9802
Flat_126-3	1.89797e-05	0.000253449	99.9935	99.9871
Flat_127+3	3.15693e-09	4.88317e-08	100	100
Flat_127-3	3.53523e-08	5.46832e-07	100	100
Flat_128+3	6.86902e-10	7.04414e-09	100	100
Flat_128-3	5.28262e-09	5.67083e-08	100	100
Flat_129+3	4.2539e-08	9.24369e-07	100	99.9999
Flat_129-3	4.37916e-07	9.51104e-06	99.9991	99.9996
Flat_13+3	0.0184735	0.161812	89.2455	89.785
Flat_13-3	0.0274361	0.222731	85.7694	85.4592
Flat_130+3	0	0	100	100
Flat_130-3	0	0	100	100
Flat_131+3	0.014552	0.113282	92.6954	93.088
Flat_131-3	0.0233896	0.192536	87.1873	87.6586
Flat_132+3	0.000480836	0.00590652	99.6261	99.5819
Flat_132-3	0.00146975	0.0166131	98.9251	98.9308
Flat_133+3	0.000479735	0.00538123	99.713	99.7037
Flat_133-3	0.000997975	0.0116209	99.2896	99.3743
Flat_134+3	0.000546204	0.0058705	99.6586	99.6665
Flat_134-3	0.00147767	0.0150318	98.884	98.9913
Flat_135+3	0.000652505	0.00609627	99.6119	99.6437
Flat_135-3	0.00129945	0.0133516	99.0997	99.1444
Flat_136+3	0.000243463	0.00306687	99.8424	99.822
Flat_136-3	0.000656582	0.00730818	99.4408	99.4889
Flat_137+3	0.000261662	0.00327813	99.8124	99.8241
Flat_137-3	0.00062762	0.00745312	99.444	99.516
Flat_138+3	0.000675465	0.00742479	99.6084	99.5498
Flat_138-3	0.00163925	0.0172005	98.6962	98.7328
Flat_139+3	0.000283123	0.00332372	99.7944	99.818
Flat_139-3	0.000760888	0.00837123	99.5388	99.5333
Flat_14+3	0.0234572	0.20098	85.8632	86.5244
Flat_14-3	0.0320231	0.265239	82.1772	82.3028
Flat_140+3	0.00048852	0.00549836	99.675	99.67
Flat_140-3	0.00121819	0.0133281	99.1588	99.2031
Flat_141+3	0.000297225	0.00383624	99.7563	99.7415
Flat_141-3	0.000654051	0.00786091	99.4646	99.5027
Flat_142+3	0.000415384	0.0048968	99.6662	99.679
Flat_142-3	0.000813141	0.00950427	99.462	99.5382
Flat_143+3	0.000378499	0.00440607	99.7079	99.6864
Flat_143-3	0.0012085	0.0127021	99.2679	99.3233
Flat_144+3	0.000171884	0.00188757	99.9222	99.9291
Flat_144-3	0.00037981	0.00442198	99.7521	99.7602
Flat_145+3	0.00027148	0.00233346	99.8544	99.8574
Flat_145-3	0.000656652	0.00593497	99.6647	99.7147
Flat_146+3	0.000367328	0.00385424	99.7867	99.8078
Flat_146-3	0.000691276	0.00706982	99.5512	99.5565
Flat_147+3	6.254e-05	0.000678864	99.9667	99.9687
Flat_147-3	0.00024563	0.00256256	99.8615	99.8561
Flat_148+3	9.5147e-05	0.000976971	99.9477	99.9372
Flat_148-3	0.000418069	0.00409938	99.7246	99.7497
Flat_149+3	0.00112592	0.00875361	99.4567	99.4025
Flat_149-3	0.00170738	0.0141212	99.205	99.2766
Flat_15+3	0.0125481	0.118223	91.948	92.379
Flat_15-3	0.0205873	0.183859	87.2999	87.2121
Flat_150+3	0.000125056	0.00178961	99.8794	99.8846
Flat_150-3	0.000381399	0.00496562	99.711	99.727
Flat_151+3	3.95456e-05	0.000527823	99.9837	99.9833
Flat_151-3	0.000220882	0.00277338	99.7812	99.7874
Flat_152+3	0.000265353	0.00262861	99.8226	99.8239
Flat_152-3	0.000794176	0.00794934	99.5493	99.6063
Flat_153+3	4.86224e-05	0.000631497	99.9786	99.9861
Flat_153-3	0.000187816	0.00246248	99.8435	99.8558
Flat_154+3	9.19321e-05	0.0010188	99.9454	99.9251
Flat_154-3	0.000336542	0.00375412	99.7727	99.7565
Flat_155+3	0.000203296	0.00259948	99.8385	99.8161
Flat_155-3	0.00064423	0.00763659	99.5689	99.6107
Flat_156+3	0.000332602	0.00440589	99.7655	99.7583
Flat_156-3	0.000794511	0.00969419	99.4737	99.5271
Flat_157+3	0.000356188	0.00377658	99.8646	99.8011
Flat_157-3	0.000835737	0.00830965	99.4436	99.5038
Flat_158+3	9.41123e-05	0.00105664	99.9471	99.9432
Flat_158-3	0.000328318	0.00404104	99.7532	99.7625
Flat_159+3	0.000127059	0.00160565	99.9012	99.9281
Flat_159-3	0.000314757	0.00424754	99.6917	99.7024
Flat_16+3	0.00471857	0.0476952	96.8145	97.2737
Flat_16-3	0.00999439	0.0972434	93.7438	93.6223
Flat_160+3	0.00022538	0.00267452	99.877	99.8885
Flat_160-3	0.000668791	0.00772574	99.4314	99.4621
Flat_161+3	7.97331e-05	0.000737616	99.9616	99.9515
Flat_161-3	0.000256423	0.00271904	99.8675	99.8786
Flat_162+3	4.133e-05	0.000451049	99.9627	99.951
Flat_162-3	0.000213612	0.00227847	99.8913	99.8999
Flat_163+3	3.26443e-05	0.000370901	99.9845	99.9819
Flat_163-3	0.000187698	0.00207493	99.8966	99.9215
Flat_164+3	7.85966e-05	0.00083991	99.9805	99.9804
Flat_164-3	0.000356392	0.00370666	99.7474	99.7857
Flat_165+3	0.000105465	0.00128128	99.9247	99.9348
Flat_165-3	0.000512091	0.00595332	99.521	99.5972
Flat_166+3	4.05606e-05	0.000388582	99.9304	99.941
Flat_166-3	0.000267573	0.00235131	99.8555	99.8177
Flat_167+3	2.87296e-05	0.000348062	99.974	99.9734
Flat_167-3	0.000124891	0.00140423	99.9072	99.9075
Flat_168+3	4.17174e-05	0.00043036	99.9792	99.9655
Flat_168-3	0.000162983	0.00162433	99.8747	99.8794
Flat_169+3	8.04429e-05	0.000742335	99.9732	99.9828
Flat_169-3	0.00029289	0.00275562	99.8307	99.8121
Flat_17+3	0.000453491	0.00456755	99.7584	99.8144
Flat_17-3	0.00177606	0.0175087	99.0046	98.9794
Flat_170+3	0.000121468	0.000873207	99.9464	99.9267
Flat_170-3	0.000349803	0.00284922	99.7912	99.7829
Flat_171+3	1.11114e-05	0.00011491	99.9948	99.9945
Flat_171-3	6.24319e-05	0.000649443	99.9408	99.9473
Flat_172+3	1.01461e-05	0.000182137	99.9897	99.9873
Flat_172-3	4.68423e-05	0.000674804	99.9347	99.945
Flat_173+3	2.06683e-05	0.000380993	99.968	99.9674
Flat_173-3	4.67384e-05	0.000746018	99.9832	99.9817
Flat_174+3	3.85912e-05	0.000477596	99.9589	99.9641
Flat_174-3	7.17573e-05	0.00110452	99.9493	99.9617
Flat_175+3	7.58118e-05	0.000866689	99.9485	99.9465
Flat_175-3	0.000122907	0.0016177	99.9266	99.9158
Flat_176+3	2.42984e-05	0.000278642	99.9872	99.9838
Flat_176-3	0.000127685	0.00134741	99.912	99.9145
Flat_177+3	9.91319e-06	0.000117943	99.9991	99.9962
Flat_177-3	4.8135e-05	0.000524529	99.9639	99.9642
Flat_178+3	9.78124e-06	8.31616e-05	100	100
Flat_178-3	5.98947e-05	0.000457817	99.9979	99.9986
Flat_179+3	0.000115265	0.000904992	99.9229	99.9195
Flat_179-3	0.000293381	0.00254885	99.8674	99.9028
Flat_18+3	0.0132394	0.117142	91.3906	92.308
Flat_18-3	0.0156081	0.138719	91.4183	91.1055
Flat_180+3	0.000123193	0.00104821	99.936	99.9268
Flat_180-3	0.000234468	0.00212383	99.8325	99.8473
Flat_181+3	8.33199e-05	0.0010338	99.9367	99.9371
Flat_181-3	0.000241935	0.0029351	99.7981	99.8164
Flat_182+3	9.95387e-05	0.00132053	99.9137	99.9152
Flat_182-3	0.000297551	0.00366299	99.7382	99.7447
Flat_183+3	0.000291939	0.00335028	99.8575	99.8363
Flat_183-3	0.000935217	0.00930113	99.5104	99.4977
Flat_184+3	5.8135e-05	0.000773565	99.9166	99.9181
Flat_184-3	0.000141633	0.00183092	99.8849	99.9025
Flat_185+3	3.68604e-05	0.000388667	99.985	99.9809
Flat_185-3	0.000154711	0.00148833	99.8685	99.8825
Flat_186+3	1.91989e-05	0.000353695	99.9795	99.9784
Flat_186-3	6.0962e-05	0.00087097	99.9122	99.9429
Flat_187+3	2.24772e-05	0.000337582	99.9871	99.9808
Flat_187-3	7.53457e-05	0.000993443	99.9295	99.9291
Flat_188+3	1.96133e-05	0.000358589	99.9784	99.9803
Flat_188-3	6.29918e-05	0.000928096	99.957	99.9653
Flat_189+3	4.86844e-06	6.12939e-05	99.9982	99.9984
Flat_189-3	3.96708e-05	0.000382686	99.9788	99.9829
Flat_19+3	0.0113691	0.10828	92.1955	92.7007
Flat_19-3	0.0198209	0.17815	87.5586	87.5124
Flat_190+3	1.86353e-05	0.000212559	99.9802	99.9799
Flat_190-3	3.59414e-05	0.000503446	99.9761	99.9895
Flat_191+3	1.03911e-05	0.000141331	99.9925	99.9915
Flat_191-3	4.13056e-05	0.000577054	99.9461	99.9547
Flat_192+3	2.18251e-05	0.000249932	99.9936	99.9886
Flat_192-3	3.24223e-05	0.00033208	99.9923	99.9846
Flat_193+3	4.04033e-05	0.00043447	99.985	99.9885
Flat_193-3	9.28849e-05	0.000854027	99.9557	99.9523
Flat_194+3	1.11446e-06	1.66985e-05	99.9984	99.9984
Flat_194-3	1.05327e-05	0.000151733	99.9881	99.9947
Flat_195+3	4.28828e-05	0.000512908	99.9809	99.9801
Flat_195-3	0.000106016	0.00136417	99.9585	99.9538
Flat_196+3	1.30697e-05	0.000217399	99.9853	99.986
Flat_196-3	3.66378e-05	0.000483104	99.9756	99.9715
Flat_197+3	5.58428e-05	0.000761693	99.9393	99.9274
Flat_197-3	7.66464e-05	0.00103595	99.9473	99.9508
Flat_198+3	2.45681e-05	0.000274425	99.9768	99.9811
Flat_198-3	6.75943e-05	0.000781177	99.9144	99.9158
Flat_199+3	5.03768e-05	0.000633184	99.9648	99.9596
Flat_199-3	8.37074e-05	0.00115003	99.9373	99.9467
Flat_2+3	0.0297765	0.245686	82.567	83.844
Flat_2-3	0.0279407	0.24293	83.9928	83.5702
Flat_20+3	0.00404763	0.0382743	97.5994	97.7965
Flat_20-3	0.00753809	0.0744264	95.056	95.019
Flat_200+3	5.17078e-06	8.27371e-05	99.9974	99.9935
Flat_200-3	3.11887e-05	0.000407345	99.9607	99.9603
Flat_201+3	1.58356e-05	0.000214672	99.9884	99.9884
Flat_201-3	7.1965e-05	0.000938616	99.914	99.9174
Flat_202+3	3.32146e-05	0.000373676	99.9834	99.9792
Flat_202-3	0.000107019	0.00111217	99.904	99.9078
Flat_203+3	2.1971e-06	3.52511e-05	99.9996	99.9992
Flat_203-3	1.55961e-05	0.000239793	99.9826	99.9769
Flat_204+3	1.47298e-05	0.000165784	100	100
Flat_204-3	1.02284e-05	0.000167298	99.9974	99.9989
Flat_205+3	1.50964e-06	2.51376e-05	99.999	99.9978
Flat_205-3	1.36468e-05	0.000219344	99.9958	99.9974
Flat_206+3	2.20893e-06	3.50099e-05	99.9972	99.9982
Flat_206-3	1.28383e-05	0.000168241	99.9936	99.998
Flat_207+3	2.96925e-05	0.000329678	99.9878	99.9848
Flat_207-3	0.000117079	0.00126649	99.8795	99.8881
Flat_208+3	2.80677e-06	4.08607e-05	99.9993	99.9982
Flat_208-3	1.97027e-05	0.000280952	99.9711	99.9772
Flat_209+3	3.92634e-06	8.01167e-05	99.9998	99.9984
Flat_209-3	6.16007e-06	0.000130451	99.9979	99.9974
Flat_21+3	0.0056201	0.0502468	96.6991	96.9484
Flat_21-3	0.0181272	0.156176	89.158	89.4115
Flat_210+3	2.29561e-05	0.000273923	99.969	99.9724
Flat_210-3	8.34319e-05	0.00087243	99.9409	99.9484
Flat_211+3	4.04089e-05	0.000547626	99.9557	99.9489
Flat_211-3	6.90544e-05	0.000898557	99.948	99.9548
Flat_212+3	1.61302e-05	0.000218367	99.9925	99.9886
Flat_212-3	7.33426e-05	0.000945754	99.9585	99.9517
Flat_213+3	6.7696e-05	0.000936977	99.9598	99.9649
Flat_213-3	0.000117762	0.00163822	99.8829	99.9051
Flat_214+3	0.000101185	0.00072819	99.9614	99.9729
Flat_214-3	0.000125241	0.00109934	99.8985	99.9075
Flat_215+3	6.72132e-05	0.000860287	99.9339	99.9016
Flat_215-3	0.000158041	0.00199667	99.8852	99.8746
Flat_216+3	6.21692e-06	0.0001222	99.9956	99.9948
Flat_216-3	2.0118e-05	0.000348031	99.9845	99.9851
Flat_217+3	1.99207e-05	0.000105763	100	100
Flat_217-3	5.28921e-05	0.000333578	99.9739	99.9847
Flat_218+3	4.85407e-05	0.000626899	99.9862	99.9747
Flat_218-3	0.000187845	0.00223983	99.8406	99.8474
Flat_219+3	1.55832e-05	0.000241487	99.9867	99.9838
Flat_219-3	5.65695e-05	0.000730926	99.9757	99.9769
Flat_22+3	0.00225513	0.0221816	98.7572	98.9084
Flat_22-3	0.00808216	0.0781212	94.2094	94.553
Flat_220+3	3.59894e-06	4.92965e-05	99.999	99.999
Flat_220-3	1.46548e-05	0.000211717	99.9951	99.9954
Flat_221+3	1.01476e-05	0.000108	100	100
Flat_221-3	5.80087e-05	0.000600846	99.9729	99.979
Flat_222+3	1.68681e-06	1.33703e-05	99.9996	99.9993
Flat_222-3	1.62684e-05	0.000130612	99.9974	99.999
Flat_223+3	3.12684e-05	0.000348922	99.9869	99.9867
Flat_223-3	5.3678e-05	0.000628638	99.9377	99.9361
Flat_224+3	9.00101e-05	0.000769109	99.9868	99.9921
Flat_224-3	0.000120321	0.00123654	99.9204	99.9292
Flat_225+3	4.54942e-06	8.11902e-05	99.9932	99.9931
Flat_225-3	1.92719e-05	0.000302646	99.9834	99.9791
Flat_226+3	8.16209e-06	9.16995e-05	99.997	99.9967
Flat_226-3	3.41563e-05	0.000396989	99.9748	99.9748
Flat_227+3	1.56929e-05	0.000266653	99.9803	99.9787
Flat_227-3	4.668e-05	0.000516962	99.9824	99.9893
Flat_228+3	9.0838e-06	0.000182917	99.9868	99.9898
Flat_228-3	2.9389e-05	0.000496317	99.9623	99.9639
Flat_229+3	2.75041e-06	3.03685e-05	100	99.9992
Flat_229-3	2.62979e-05	0.000289668	99.9909	99.9867
Flat_23+3	0.00213473	0.0191625	98.9201	98.9469
Flat_23-3	0.00766797	0.0680422	95.5296	95.8264
Flat_230+3	4.03954e-05	0.000546436	99.9833	99.9853
Flat_230-3	0.000108726	0.0013788	99.9174	99.934
Flat_231+3	4.10883e-07	5.54977e-06	100	99.9996
Flat_231-3	3.91574e-06	5.30964e-05	99.9974	99.999
Flat_232+3	5.50049e-06	6.59269e-05	100	99.998
Flat_232-3	3.37689e-05	0.000404211	99.9829	99.9756
Flat_233+3	0.000438454	0.0047354	99.6383	99.6649
Flat_233-3	0.0010804	0.0115007	99.2713	99.2879
Flat_234+3	5.22315e-06	5.58473e-05	99.9975	99.9994
Flat_234-3	1.01841e-05	0.000122579	99.994	99.9978
Flat_235+3	2.98634e-07	3.64811e-06	100	100
Flat_235-3	3.05048e-06	3.72825e-05	99.9997	99.9999
Flat_236+3	5.276e-06	5.97796e-05	99.999	99.9985
Flat_236-3	2.14327e-05	0.00024327	99.9858	99.9881
Flat_237+3	0.0213752	0.167595	89.5197	89.3961
Flat_237-3	0.0257461	0.211251	85.4759	86.8556
Flat_238+3	0.00591698	0.0548557	96.5648	96.5838
Flat_238-3	0.0117823	0.104102	93.1448	93.514
Flat_239+3	0.0254647	0.227773	84.2446	84.6981
Flat_239-3	0.0657577	0.516111	61.2202	64.1514
Flat_24+3	0.00394925	0.0334456	98.0172	98.0224
Flat_24-3	0.0117482	0.100049	93.7913	94.2284
Flat_240+3	0.00556263	0.0516462	96.6404	96.6785
Flat_240-3	0.0141581	0.13151	91.8996	92.1204
Flat_241+3	0.00909637	0.0813284	94.8078	94.7689
Flat_241-3	0.0190873	0.171448	88.6759	89.4997
Flat_242+3	0.00275692	0.0270837	98.3734	98.3237
Flat_242-3	0.00838407	0.0797575	94.5825	94.8658
Flat_243+3	0.00526655	0.0500582	96.543	96.572
Flat_243-3	0.0142189	0.128121	91.04	91.6551
Flat_244+3	0.000411321	0.00466114	99.7914	99.7888
Flat_244-3	0.00173944	0.0184266	98.7908	98.9126
Flat_245+3	0.00100424	0.0102525	99.4615	99.4995
Flat_245-3	0.00425224	0.041252	97.5454	97.6392
Flat_246+3	0.00110088	0.0118346	99.2855	99.3234
Flat_246-3	0.00473586	0.0495822	96.7555	97.0305
Flat_247+3	0.000799863	0.00793486	99.5562	99.567
Flat_247-3	0.00324313	0.0314562	98.244	98.3753
Flat_248+3	0.00115981	0.0123474	99.3179	99.3076
Flat_248-3	0.00474278	0.048521	96.724	96.9627
Flat_249+3	0.0146811	0.134825	91.5524	91.3262
Flat_249-3	0.0304759	0.258877	81.8558	83.2838
Flat_25+3	0.00450861	0.0383319	97.2981	97.5418
Flat_25-3	0.0151042	0.129903	91.1754	91.6786
Flat_250+3	0.00609864	0.0625541	95.9646	95.8817
Flat_250-3	0.0115046	0.110895	92.2699	92.9454
Flat_251+3	0.00018878	0.00197237	99.8946	99.9002
Flat_251-3	0.000589374	0.00646607	99.5486	99.5979
Flat_252+3	0.00690903	0.066815	95.9983	96.0852
Flat_252-3	0.0195618	0.173573	88.0559	88.6742
Flat_253+3	0.00403235	0.0398337	97.6216	97.6498
Flat_253-3	0.0115294	0.107928	93.0415	93.6017
Flat_254+3	0.00160878	0.0171789	98.9244	98.9007
Flat_254-3	0.0058713	0.0564313	96.4601	96.6391
Flat_255+3	0.000823015	0.00898081	99.4842	99.4833
Flat_255-3	0.00234898	0.0249679	98.476	98.6007
Flat_256+3	0.00163014	0.0164544	99.0166	99.0364
Flat_256-3	0.00413898	0.0419691	97.28	97.3691
Flat_257+3	0.000870328	0.00951056	99.4388	99.4611
Flat_257-3	0.00155592	0.0164491	98.9515	99.034
Flat_258+3	0.000747509	0.00834503	99.535	99.5265
Flat_258-3	0.00117487	0.0130289	99.2065	99.2603
Flat_259+3	0.000522015	0.00535803	99.6473	99.6542
Flat_259-3	0.000955416	0.00917133	99.3918	99.4818
Flat_26+3	0.0082477	0.0655839	96.1688	96.23
Flat_26-3	0.0189196	0.153474	90.5385	90.8418
Flat_260+3	0.00040109	0.00411249	99.715	99.7441
Flat_260-3	0.000904567	0.00890841	99.4957	99.566
Flat_261+3	0.000607093	0.00588493	99.5644	99.5373
Flat_261-3	0.000908185	0.0090019	99.4203	99.494
Flat_262+3	0.00153496	0.0125658	99.2999	99.2687
Flat_262-3	0.00199007	0.0171889	99.0485	99.0667
Flat_263+3	0.000404065	0.00442504	99.7769	99.7498
Flat_263-3	0.000729376	0.00789074	99.4732	99.5123
Flat_264+3	0.000742875	0.00769402	99.5459	99.521
Flat_264-3	0.00123848	0.0124343	99.2364	99.305
Flat_265+3	0.000478775	0.00530447	99.6493	99.6275
Flat_265-3	0.000862091	0.00946921	99.4676	99.5177
Flat_266+3	0.000657501	0.00728608	99.5239	99.4874
Flat_266-3	0.00112124	0.0120758	99.1939	99.2358
Flat_267+3	0.000565517	0.00607045	99.614	99.6255
Flat_267-3	0.000962106	0.0102947	99.3632	99.3159
Flat_268+3	0.0007969	0.00786188	99.4804	99.4822
Flat_268-3	0.00148561	0.0145222	99.0007	99.0048
Flat_269+3	0.000270688	0.0032582	99.7839	99.7671
Flat_269-3	0.000510458	0.00598154	99.7458	99.7332
Flat_27+3	0.00292821	0.0238335	98.4952	98.5481
Flat_27-3	0.0111327	0.096851	93.5706	94.1551
Flat_270+3	0.00026783	0.00298601	99.7947	99.8184
Flat_270-3	0.000452185	0.00521715	99.6638	99.6444
Flat_271+3	0.00015715	0.00197533	99.9122	99.9165
Flat_271-3	0.000300232	0.00355723	99.7843	99.8074
Flat_272+3	0.000379894	0.00413042	99.7737	99.7525
Flat_272-3	0.000735269	0.00760833	99.5789	99.5875
Flat_273+3	0.00143857	0.0119309	99.3613	99.3408
Flat_273-3	0.00157874	0.0137335	99.2285	99.1684
Flat_274+3	0.000435731	0.00517803	99.6737	99.6828
Flat_274-3	0.000763116	0.00865957	99.4834	99.5144
Flat_275+3	0.000454932	0.00513573	99.6273	99.5917
Flat_275-3	0.000831668	0.00910901	99.3985	99.4834
Flat_276+3	0.000423285	0.00449957	99.7571	99.7501
Flat_276-3	0.000774686	0.00826648	99.4224	99.4636
Flat_277+3	0.000316912	0.00336538	99.7659	99.7737
Flat_277-3	0.000490608	0.00553313	99.6238	99.6212
Flat_278+3	0.000593536	0.00627097	99.6378	99.683
Flat_278-3	0.00126453	0.0130223	99.1414	99.2591
Flat_279+3	0.000185408	0.00188464	99.9305	99.9344
Flat_279-3	0.000324463	0.00332717	99.7709	99.8312
Flat_28+3	0.00174865	0.0152469	99.1496	99.1598
Flat_28-3	0.00907481	0.0809744	94.2817	94.7179
Flat_280+3	0.000709422	0.00569174	99.7207	99.737
Flat_280-3	0.000878025	0.0074625	99.5349	99.5989
Flat_281+3	0.000573999	0.00609811	99.7001	99.7082
Flat_281-3	0.000936895	0.00996761	99.3608	99.3557
Flat_282+3	0.000474144	0.00539157	99.6772	99.6817
Flat_282-3	0.000788162	0.00883068	99.3789	99.4468
Flat_283+3	0.000362339	0.00387756	99.7705	99.7719
Flat_283-3	0.000598913	0.00663039	99.6092	99.6373
Flat_284+3	0.000554595	0.00602775	99.6696	99.6322
Flat_284-3	0.000944265	0.0100528	99.2692	99.327
Flat_285+3	0.000425763	0.00401531	99.6985	99.7065
Flat_285-3	0.000645787	0.00622298	99.7123	99.7092
Flat_286+3	0.000947232	0.00839185	99.5962	99.6172
Flat_286-3	0.00131154	0.0123225	99.2642	99.337
Flat_287+3	0.00130345	0.0115437	99.4028	99.4718
Flat_287-3	0.00192504	0.0183889	98.9438	98.9276
Flat_288+3	0.000602642	0.00628658	99.6489	99.6662
Flat_288-3	0.000987359	0.0103505	99.3954	99.4296
Flat_289+3	0.000333979	0.00369079	99.8086	99.8021
Flat_289-3	0.000652508	0.00711248	99.5503	99.6045
Flat_29+3	0.00690259	0.058773	96.359	96.3539
Flat_29-3	0.0208597	0.170535	88.9237	89.6244
Flat_290+3	0.000650347	0.00645932	99.6994	99.6503
Flat_290-3	0.00100604	0.00972244	99.3419	99.4293
Flat_291+3	0.00122091	0.0121153	99.3169	99.297
Flat_291-3	0.00161533	0.0156733	99.0569	99.1318
Flat_292+3	9.13456e-05	0.000977277	99.9389	99.9283
Flat_292-3	0.000171882	0.00181779	99.9063	99.9115
Flat_293+3	0.000239391	0.00263818	99.8487	99.8568
Flat_293-3	0.000384737	0.00415787	99.7541	99.766
Flat_3+3	0.0123292	0.116212	92.1094	92.5681
Flat_3-3	0.0206645	0.180482	87.5122	87.5458
Flat_30+3	0.00248739	0.0244136	98.5395	98.5328
Flat_30-3	0.00657759	0.0643761	96.0041	96.0946
Flat_31+3	0.00090713	0.00838411	99.4967	99.5072
Flat_31-3	0.00564043	0.0517235	96.5551	96.8201
Flat_32+3	0.0131542	0.0927517	95.3559	95.2576
Flat_32-3	0.0164173	0.129028	92.2313	92.8282
Flat_33+3	0.00131566	0.0102935	99.4163	99.4564
Flat_33-3	0.00679719	0.0601428	95.7886	95.9165
Flat_34+3	0.000403317	0.00361669	99.7658	99.8049
Flat_34-3	0.00324248	0.0289419	98.0015	98.1669
Flat_35+3	0.000680485	0.00613511	99.6085	99.5965
Flat_35-3	0.00434389	0.040928	97.2827	97.4595
Flat_36+3	0.000536702	0.00442751	99.7219	99.7274
Flat_36-3	0.00387736	0.0329993	97.8367	97.9734
Flat_37+3	0.000594494	0.00555563	99.658	99.6639
Flat_37-3	0.00450746	0.0419254	97.0329	97.1588
Flat_38+3	0.00546287	0.0479015	97.0972	97.2607
Flat_38-3	0.0173627	0.147598	90.2959	90.5314
Flat_39+3	0.00442596	0.0376477	97.7454	97.7771
Flat_39-3	0.0148563	0.122596	92.1672	92.4204
Flat_4+3	0.0124723	0.113282	92.1403	92.8674
Flat_4-3	0.01538	0.139619	90.5609	90.3285
Flat_40+3	0.00437439	0.0332023	98.2259	98.2905
Flat_40-3	0.00910881	0.0765373	95.2506	95.3786
Flat_41+3	0.000143723	0.00123673	99.9291	99.9412
Flat_41-3	0.00135998	0.0116738	99.3217	99.3568
Flat_42+3	0.000377477	0.0032939	99.7949	99.8195
Flat_42-3	0.00305516	0.0268512	98.1286	98.2855
Flat_43+3	0.000565959	0.005355	99.6362	99.7074
Flat_43-3	0.00434212	0.0412235	97.4101	97.5499
Flat_44+3	0.00916704	0.0733631	95.8736	95.9863
Flat_44-3	0.0219594	0.174506	89.0531	89.7521
Flat_45+3	0.000158617	0.0014604	99.8904	99.8951
Flat_45-3	0.00155311	0.0140798	99.214	99.2319
Flat_46+3	0.0114896	0.0816306	96.2403	96.0674
Flat_46-3	0.0140232	0.11296	93.1403	93.7385
Flat_47+3	0.000665326	0.00633114	99.5766	99.6153
Flat_47-3	0.00503448	0.0472475	96.8752	96.8815
Flat_48+3	0.000593748	0.00503395	99.6819	99.6762
Flat_48-3	0.00448619	0.0380688	97.681	97.8659
Flat_49+3	0.000409989	0.00354154	99.78	99.7715
Flat_49-3	0.00346089	0.0296208	98.0968	98.2552
Flat_5+3	0.013945	0.123065	91.6178	92.1055
Flat_5-3	0.0230347	0.192748	86.9037	86.998
Flat_50+3	0.000502458	0.00428821	99.7492	99.7663
Flat_50-3	0.00381011	0.0327562	97.8996	97.9745
Flat_51+3	0.00207946	0.0206675	98.6595	98.8331
Flat_51-3	0.00613936	0.0616631	95.7915	95.9568
Flat_52+3	0.00552677	0.0374195	98.297	98.3494
Flat_52-3	0.0125837	0.0998348	93.7207	93.9077
Flat_53+3	0.00189033	0.0187257	99.0472	99.0505
Flat_53-3	0.00559289	0.0519005	96.2172	96.5468
Flat_54+3	0.00742414	0.054051	96.8534	96.9036
Flat_54-3	0.012261	0.106986	92.9144	93.4038
Flat_55+3	0.00663868	0.056341	96.56	96.5792
Flat_55-3	0.0182291	0.149886	90.2357	91.0063
Flat_56+3	0.00237989	0.0222269	98.6492	98.7327
Flat_56-3	0.00747056	0.0683497	95.4024	95.7638
Flat_57+3	0.00170653	0.0161026	99.2478	99.2589
Flat_57-3	0.00581209	0.0522749	96.7147	96.9044
Flat_58+3	0.00598672	0.0504739	97.1249	97.0879
Flat_58-3	0.0117331	0.102596	93.4015	93.8879
Flat_59+3	0.00340733	0.0310111	98.0505	98.0559
Flat_59-3	0.00797215	0.0716166	95.5035	95.6762
Flat_6+3	0.02899	0.240388	82.9702	84.2751
Flat_6-3	0.0271775	0.236278	83.8872	83.5822
Flat_60+3	0.00337445	0.0310723	98.0196	98.0195
Flat_60-3	0.00861822	0.079808	95.0859	95.4659
Flat_61+3	0.00421595	0.04194	97.5418	97.407
Flat_61-3	0.0093241	0.089251	93.8925	94.356
Flat_62+3	0.00349279	0.0321645	97.8298	97.9586
Flat_62-3	0.00850231	0.0813296	94.3398	94.6441
Flat_63+3	0.00215237	0.0217185	98.5142	98.586
Flat_63-3	0.00745058	0.0695637	95.4355	95.6755
Flat_64+3	0.00532702	0.0435742	97.3629	97.5633
Flat_64-3	0.013118	0.109363	93.3139	93.8302
Flat_65+3	0.00649745	0.0555822	96.6363	96.7299
Flat_65-3	0.0111995	0.101727	93.3534	93.7341
Flat_66+3	0.0020339	0.0195208	98.8755	98.805
Flat_66-3	0.00593862	0.0549781	96.1178	96.3062
Flat_67+3	0.000318665	0.00301308	99.869	99.8391
Flat_67-3	0.00163173	0.0161961	99.085	99.1423
Flat_68+3	0.000593294	0.00585917	99.6792	99.7396
Flat_68-3	0.00193076	0.0182218	98.987	99.0382
Flat_69+3	0.00145257	0.0129855	99.41	99.4473
Flat_69-3	0.00399813	0.0350678	98.2432	98.3449
Flat_7+3	0.0351163	0.288022	80.488	81.1436
Flat_7-3	0.0322436	0.270169	81.3971	81.7901
Flat_70+3	0.00259636	0.0229775	98.5257	98.6999
Flat_70-3	0.00659382	0.0649244	95.5465	95.8393
Flat_71+3	0.00345493	0.0302243	98.2158	98.4073
Flat_71-3	0.0124308	0.104465	93.0524	93.4055
Flat_72+3	0.00196042	0.0180407	98.8573	98.8462
Flat_72-3	0.00706536	0.0650821	95.4969	95.8217
Flat_73+3	0.00503525	0.0401415	97.848	98.0938
Flat_73-3	0.0146329	0.119842	92.356	92.51
Flat_74+3	0.00126407	0.0113533	99.3349	99.4351
Flat_74-3	0.00430615	0.0404115	97.758	97.8223
Flat_75+3	0.0012793	0.0123875	99.4661	99.4909
Flat_75-3	0.00424838	0.0389371	97.5284	97.6801
Flat_76+3	0.00320095	0.0323299	98.0338	98.0248
Flat_76-3	0.00744777	0.0748237	94.6556	94.8689
Flat_77+3	0.00119045	0.0126096	99.2738	99.2397
Flat_77-3	0.00437105	0.0430901	97.2181	97.3651
Flat_78+3	0.00163551	0.0149289	99.0827	99.09
Flat_78-3	0.00554417	0.0510422	97.0186	97.1307
Flat_79+3	0.00203261	0.0174956	99.1046	99.0877
Flat_79-3	0.00580066	0.0488358	96.5506	96.8818
Flat_8+3	0.021036	0.176723	88.0232	88.7687
Flat_8-3	0.0198342	0.1729	88.2306	88.2075
Flat_80+3	0.00252362	0.0199001	98.8852	98.9237
Flat_80-3	0.0065352	0.0582848	96.0293	96.2892
Flat_81+3	0.00115558	0.0102352	99.4114	99.4968
Flat_81-3	0.00342082	0.0304288	98.1132	98.1406
Flat_82+3	0.00120945	0.0110543	99.2687	99.3157
Flat_82-3	0.0029267	0.0263022	98.4042	98.4394
Flat_83+3	0.00107558	0.0112913	99.2484	99.2747
Flat_83-3	0.00302217	0.030388	98.145	98.1898
Flat_84+3	0.0169537	0.151032	89.5618	89.8556
Flat_84-3	0.0995194	0.742342	23.493	41.4054
Flat_85+3	0.0155093	0.133712	90.593	91.0345
Flat_85-3	0.016021	0.148343	89.1163	89.0517
Flat_86+3	0.0631455	0.475107	65.3592	67.5854
Flat_86-3	0.0453935	0.383704	71.0161	72.3166
Flat_87+3	0	0	100	100
Flat_87-3	0	0	100	100
Flat_88+3	0	0	100	100
Flat_88-3	0	0	100	100
Flat_89+3	0.038993	0.308241	79.2083	81.076
Flat_89-3	0.0550847	0.44244	68.9902	69.6664
Flat_9+3	0.0168793	0.147991	90.0738	90.7647
Flat_9-3	0.025282	0.217258	85.368	85.2489
Flat_90+3	0.0032603	0.0277804	98.7621	98.8222
Flat_90-3	0.00655674	0.0538302	97.5486	97.7553
Flat_91+3	2.79376e-05	0.000164939	99.9992	99.9966
Flat_91-3	0.000626135	0.00765736	99.483	99.4968
Flat_92+3	2.46233e-05	0.000145874	99.9998	99.9966
Flat_92-3	5.85824e-05	0.000444653	99.9619	99.9535
Flat_93+3	5.89035e-05	0.00058669	99.9638	99.9784
Flat_93-3	0.000247967	0.00250546	99.8424	99.8707
Flat_94+3	0	0	100	100
Flat_94-3	0	0	100	100
Flat_95+3	0.006385	0.0565543	96.5948	96.6904
Flat_95-3	0.0153141	0.129046	92.7917	92.9169
Flat_96+3	0.0212097	0.183754	87.5918	89.2667
Flat_96-3	0.0422174	0.346868	77.2905	75.5883
Flat_97+3	0.080736	0.619155	51.0336	54.9333
Flat_97-3	0.0219366	0.197329	86.6946	87.3716
Flat_98+3	0.0132367	0.128573	91.2562	91.5319
Flat_98-3	0.103685	0.773044	34.1722	41.7588
Flat_99+3	0.0064759	0.0572222	96.5204	96.9225
Flat_99-3	0.0154633	0.135744	90.8143	90.8622
Real_0+3	0.00221354	0.020162	98.5075	98.7369
Real_0-3	0.00222099	0.0204201	98.6987	98.5739
Real_1+3	0.00403011	0.0350178	97.3984	97.6135
Real_1-3	0.00403061	0.0352768	97.8832	97.7714
Real_10+3	0.00958862	0.0836054	94.234	94.6331
Real_10-3	0.0106811	0.0939442	93.7448	93.6136
Real_100+3	0.00143514	0.0135848	99.0657	99.0705
Real_100-3	0.00172859	0.0162341	99.0038	99.0152
Real_101+3	0.00674931	0.0564201	96.2682	96.3983
Real_101-3	0.00778929	0.0647539	95.7441	96.0217
Real_102+3	0.00224758	0.0216035	98.7111	98.8516
Real_102-3	0.00304099	0.0286694	98.2046	98.2377
Real_103+3	0.00430009	0.0380039	97.7162	97.6907
Real_103-3	0.00592251	0.0517532	96.4149	96.6748
Real_104+3	0.00463848	0.0412649	96.8914	97.0411
Real_104-3	0.00528793	0.0465311	96.8533	96.8974
Real_105+3	0.00432008	0.0363971	97.7953	97.9517
Real_105-3	0.00514941	0.0430904	97.5359	97.6102
Real_106+3	0.00864537	0.0586813	96.7858	96.8331
Real_106-3	0.00847701	0.0615703	96.5766	96.673
Real_107+3	0.00419526	0.0372509	97.5743	97.635
Real_107-3	0.00515386	0.045552	97.1909	97.4436
Real_108+3	0.00649309	0.0533935	96.8397	96.8108
Real_108-3	0.00833218	0.068555	95.5877	95.7502
Real_109+3	1.68862e-05	0.000161733	99.9934	99.9968
Real_109-3	3.96075e-05	0.000395152	99.9821	99.9774
Real_11+3	0.0036675	0.0319839	97.9348	97.9805
Real_11-3	0.00361794	0.0317705	97.8283	97.8454
Real_110+3	2.14296e-05	0.000233874	99.9962	99.9952
Real_110-3	6.28553e-05	0.000673021	99.9839	99.9793
Real_111+3	3.58261e-05	0.000491746	99.974	99.975
Real_111-3	5.20387e-05	0.000618916	99.9629	99.9739
Real_112+3	4.76085e-05	0.000614314	99.9852	99.9726
Real_112-3	6.14614e-05	0.000801934	99.9447	99.9439
Real_113+3	0.000118112	0.00121188	99.9577	99.9348
Real_113-3	0.000109358	0.00119727	99.9147	99.9241
Real_114+3	1.52185e-05	0.000161362	99.9911	99.9953
Real_114-3	2.04726e-05	0.000204986	99.9988	99.9991
Real_115+3	5.95545e-05	0.00049799	99.9646	99.9685
Real_115-3	7.65768e-05	0.000973337	99.9462	99.9511
Real_116+3	6.53542e-05	0.000635291	99.949	99.9481
Real_116-3	0.000168426	0.0016717	99.8625	99.8699
Real_117+3	4.02138e-06	4.23455e-05	99.9988	99.9987
Real_117-3	2.50898e-05	0.000252442	99.9833	99.9828
Real_118+3	6.06961e-06	0.000119182	99.9926	99.9937
Real_118-3	1.10222e-05	0.000166903	99.994	99.9894
Real_119+3	2.90461e-05	0.000335449	99.9727	99.9729
Real_119-3	5.76293e-05	0.000623158	99.9749	99.9782
Real_12+3	0.00390719	0.0345332	97.6821	97.8019
Real_12-3	0.00382753	0.0341514	97.6252	97.7328
Real_120+3	2.56547e-06	3.43953e-05	99.9997	99.9995
Real_120-3	1.45817e-05	0.000155068	99.9946	99.9947
Real_121+3	3.69629e-05	0.000437207	99.978	99.9774
Real_121-3	9.85756e-05	0.00116711	99.9282	99.9498
Real_122+3	9.7361e-05	0.00107779	99.9392	99.9274
Real_122-3	0.000115233	0.00120802	99.9393	99.935
Real_123+3	5.15272e-05	0.000491622	99.9805	99.9807
Real_123-3	9.52416e-05	0.000678933	99.9229	99.9334
Real_124+3	7.08236e-05	0.000763906	99.9703	99.9716
Real_124-3	0.000101324	0.00116711	99.9843	99.9824
Real_125+3	3.95841e-05	0.000480625	99.9849	99.989
Real_125-3	8.2098e-05	0.000971752	99.9354	99.9439
Real_126+3	1.50698e-05	0.000172784	99.9834	99.9808
Real_126-3	1.58885e-05	0.000207933	99.9945	99.9887
Real_127+3	2.73962e-09	4.23766e-08	100	100
Real_127-3	1.05921e-08	1.63839e-07	100	100
Real_128+3	6.83869e-10	7.01302e-09	100	100
Real_128-3	3.25532e-09	3.59779e-08	100	100
Real_129+3	3.87048e-08	8.40938e-07	100	99.9999
Real_129-3	2.09979e-07	4.56211e-06	99.9991	100
Real_13+3	0.00950678	0.0825146	94.3821	94.7767
Real_13-3	0.0111946	0.0932669	94.1441	94.131
Real_130+3	0	0	100	100
Real_130-3	0	0	100	100
Real_131+3	0.00530051	0.0417571	97.2911	97.4592
Real_131-3	0.00600688	0.0482324	96.7526	96.9026
Real_132+3	0.000363292	0.0044181	99.7058	99.6867
Real_132-3	0.000721709	0.00827586	99.5025	99.5166
Real_133+3	0.000412025	0.00461324	99.7543	99.7522
Real_133-3	0.000732876	0.00845973	99.5061	99.5543
Real_134+3	0.000498693	0.0053366	99.7011	99.7025
Real_134-3	0.00118184	0.0120863	99.1575	99.1746
Real_135+3	0.000575965	0.00539088	99.6594	99.6888
Real_135-3	0.000999176	0.0100957	99.2654	99.3198
Real_136+3	0.000209511	0.00262735	99.861	99.8408
Real_136-3	0.000466519	0.00526763	99.5742	99.6276
Real_137+3	0.000235477	0.00293593	99.8332	99.8512
Real_137-3	0.000486909	0.00581558	99.5592	99.6097
Real_138+3	0.000611332	0.00668703	99.6245	99.5803
Real_138-3	0.00131406	0.0137697	98.9488	99.0285
Real_139+3	0.000259488	0.00303175	99.8068	99.8301
Real_139-3	0.000601944	0.00665969	99.6095	99.5967
Real_14+3	0.0113904	0.0980571	93.0538	93.4161
Real_14-3	0.0131911	0.111496	92.5968	92.7972
Real_140+3	0.000415128	0.00464979	99.7194	99.7169
Real_140-3	0.000854027	0.00933663	99.4109	99.4484
Real_141+3	0.000250605	0.00322266	99.7815	99.7773
Real_141-3	0.000464383	0.00565323	99.6707	99.6918
Real_142+3	0.000426078	0.00501127	99.6614	99.6715
Real_142-3	0.00085778	0.0100132	99.4214	99.5062
Real_143+3	0.000350023	0.00404499	99.7274	99.7035
Real_143-3	0.000942257	0.00989311	99.4429	99.4942
Real_144+3	0.0001798	0.00197089	99.9136	99.9265
Real_144-3	0.000438303	0.00510445	99.7258	99.7408
Real_145+3	0.000278003	0.00238925	99.8521	99.8561
Real_145-3	0.000715959	0.00648089	99.6342	99.6839
Real_146+3	0.000376044	0.00394756	99.7801	99.8027
Real_146-3	0.000726706	0.00743338	99.5111	99.5284
Real_147+3	6.48702e-05	0.000704949	99.9667	99.9687
Real_147-3	0.000294311	0.00307104	99.83	99.8234
Real_148+3	9.729e-05	0.000999907	99.947	99.9372
Real_148-3	0.000475196	0.00464003	99.6729	99.6937
Real_149+3	0.00118348	0.00921361	99.4147	99.3644
Real_149-3	0.00189368	0.0158336	99.1266	99.1992
Real_15+3	0.00675227	0.0636833	95.685	95.8376
Real_15-3	0.00859144	0.0788178	94.3732	94.3862
Real_150+3	0.000127078	0.0018186	99.8792	99.8821
Real_150-3	0.000403516	0.00524358	99.6876	99.7149
Real_151+3	4.08183e-05	0.000545356	99.9832	99.9831
Real_151-3	0.000276318	0.0034447	99.7282	99.7334
Real_152+3	0.000272067	0.00269357	99.8216	99.8214
Real_152-3	0.000874531	0.00872853	99.518	99.5729
Real_153+3	5.20148e-05	0.000673696	99.9786	99.9847
Real_153-3	0.000244163	0.00318062	99.8009	99.818
Real_154+3	9.65168e-05	0.00107103	99.9431	99.9221
Real_154-3	0.000429745	0.00482809	99.7335	99.7142
Real_155+3	0.000225364	0.00292724	99.8265	99.8032
Real_155-3	0.00100082	0.0118284	99.3224	99.3898
Real_156+3	0.000183297	0.00238572	99.8579	99.8441
Real_156-3	0.000271725	0.00338256	99.8523	99.8558
Real_157+3	0.000332131	0.00352072	99.8787	99.8174
Real_157-3	0.000711937	0.00711276	99.5112	99.5643
Real_158+3	9.59151e-05	0.00107654	99.9471	99.9432
Real_158-3	0.000359461	0.00442587	99.7332	99.7411
Real_159+3	0.000131141	0.00165403	99.8983	99.9238
Real_159-3	0.000352159	0.00473651	99.6746	99.6749
Real_16+3	0.00590617	0.0599815	96.0788	96.6125
Real_16-3	0.0185294	0.177515	88.3549	88.3217
Real_160+3	0.000239306	0.00284206	99.8648	99.8832
Real_160-3	0.000840586	0.00965458	99.3187	99.3585
Real_161+3	8.42714e-05	0.000774335	99.9601	99.9514
Real_161-3	0.000317243	0.00336818	99.8214	99.8327
Real_162+3	4.23515e-05	0.000462305	99.9627	99.951
Real_162-3	0.000251816	0.00268309	99.8788	99.8856
Real_163+3	3.36629e-05	0.000382572	99.9822	99.9811
Real_163-3	0.000237219	0.00261338	99.8776	99.8978
Real_164+3	8.32126e-05	0.000889103	99.9791	99.9779
Real_164-3	0.000502405	0.00517996	99.6457	99.7046
Real_165+3	9.38502e-05	0.00113804	99.9298	99.9469
Real_165-3	0.000314721	0.00368819	99.7623	99.8045
Real_166+3	3.90489e-05	0.000372698	99.9306	99.941
Real_166-3	0.000212743	0.00187626	99.8805	99.8796
Real_167+3	3.07263e-05	0.000372968	99.9734	99.974
Real_167-3	0.000197371	0.00222228	99.8571	99.8507
Real_168+3	4.41077e-05	0.00045741	99.9774	99.9645
Real_168-3	0.000229693	0.00239925	99.8332	99.8476
Real_169+3	8.78987e-05	0.000807108	99.9719	99.9814
Real_169-3	0.000433416	0.00404965	99.7507	99.741
Real_17+3	0.000443128	0.00446288	99.7602	99.8158
Real_17-3	0.00160382	0.015843	99.0596	99.0444
Real_170+3	0.000132698	0.000948223	99.9461	99.9258
Real_170-3	0.000532887	0.00431795	99.7221	99.7083
Real_171+3	1.17354e-05	0.000121359	99.9947	99.9945
Real_171-3	0.00010017	0.00105124	99.9249	99.9265
Real_172+3	1.08267e-05	0.000195565	99.988	99.9873
Real_172-3	6.90242e-05	0.00096445	99.9021	99.9125
Real_173+3	2.30338e-05	0.000423056	99.964	99.9636
Real_173-3	7.12359e-05	0.00109718	99.9574	99.9617
Real_174+3	4.56361e-05	0.000558707	99.9562	99.9573
Real_174-3	0.000106888	0.00167232	99.9147	99.9338
Real_175+3	9.31642e-05	0.00102148	99.9413	99.9416
Real_175-3	0.000183034	0.00232549	99.9048	99.8952
Real_176+3	2.55564e-05	0.000293383	99.9858	99.983
Real_176-3	0.000188094	0.00196044	99.8926	99.8843
Real_177+3	1.04529e-05	0.000124448	99.9991	99.9962
Real_177-3	7.46273e-05	0.000781387	99.9459	99.9428
Real_178+3	1.10536e-05	9.61656e-05	100	100
Real_178-3	9.63622e-05	0.000750814	99.9885	99.9982
Real_179+3	0.000108323	0.000851871	99.9229	99.9208
Real_179-3	0.000241887	0.00210975	99.8826	99.9188
Real_18+3	0.00302384	0.0270607	98.047	98.2282
Real_18-3	0.00309678	0.0278759	98.4633	98.2436
Real_180+3	0.000130851	0.00111231	99.9354	99.9259
Real_180-3	0.000274772	0.00250598	99.8044	99.8187
Real_181+3	9.05693e-05	0.00112496	99.9314	99.9332
Real_181-3	0.000339111	0.00410215	99.753	99.7719
Real_182+3	0.000108265	0.00144494	99.8983	99.9041
Real_182-3	0.000426289	0.00522965	99.6018	99.6027
Real_183+3	0.000274256	0.00312997	99.8639	99.8411
Real_183-3	0.000782455	0.0078341	99.5857	99.5971
Real_184+3	6.46193e-05	0.00086399	99.9046	99.9125
Real_184-3	0.000227128	0.00289922	99.8317	99.8514
Real_185+3	3.21182e-05	0.000336013	99.9854	99.983
Real_185-3	0.000102869	0.000989768	99.9296	99.9409
Real_186+3	1.85671e-05	0.000341038	99.9795	99.9788
Real_186-3	5.49313e-05	0.000795584	99.919	99.9493
Real_187+3	2.14174e-05	0.000320123	99.9874	99.9814
Real_187-3	6.38416e-05	0.00084356	99.9425	99.9353
Real_188+3	1.63423e-05	0.000293326	99.9857	99.9889
Real_188-3	4.12516e-05	0.000624907	99.972	99.9799
Real_189+3	4.91739e-06	6.19692e-05	99.9982	99.9984
Real_189-3	4.333e-05	0.000415645	99.9776	99.9821
Real_19+3	0.00661852	0.0629324	95.411	95.7857
Real_19-3	0.00889958	0.0816704	94.4506	94.3295
Real_190+3	1.64487e-05	0.000188584	99.9802	99.98
Real_190-3	2.56515e-05	0.000353095	99.9828	99.9927
Real_191+3	1.0104e-05	0.000137537	99.9925	99.9915
Real_191-3	3.6133e-05	0.00050705	99.9504	99.9569
Real_192+3	2.13055e-05	0.000242288	99.9936	99.9886
Real_192-3	3.1374e-05	0.000320234	99.9923	99.9846
Real_193+3	3.59197e-05	0.000384141	99.985	99.989
Real_193-3	6.93722e-05	0.000651139	99.978	99.9824
Real_194+3	1.04766e-06	1.56869e-05	99.9984	99.9984
Real_194-3	6.46028e-06	9.40662e-05	99.9972	99.9982
Real_195+3	3.91719e-05	0.000469699	99.9824	99.9816
Real_195-3	8.41934e-05	0.00107315	99.9663	99.9631
Real_196+3	1.21914e-05	0.000201546	99.9855	99.9863
Real_196-3	2.95095e-05	0.000394307	99.9794	99.9762
Real_197+3	5.1291e-05	0.000696084	99.9418	99.9312
Real_197-3	6.59468e-05	0.000893954	99.9536	99.9561
Real_198+3	2.34476e-05	0.000261642	99.9768	99.9811
Real_198-3	5.91968e-05	0.00068255	99.9195	99.9236
Real_199+3	4.88187e-05	0.00061407	99.9655	99.9646
Real_199-3	7.87089e-05	0.00108024	99.9465	99.9535
Real_2+3	0.00420177	0.0364521	97.4095	97.5339
Real_2-3	0.00415433	0.0365571	97.4801	97.5773
Real_20+3	0.00345237	0.0328214	97.967	98.1128
Real_20-3	0.00572696	0.0566608	96.2249	96.2083
Real_200+3	4.94917e-06	7.85108e-05	99.9974	99.9935
Real_200-3	2.46582e-05	0.000325053	99.9614	99.9622
Real_201+3	1.51791e-05	0.000205674	99.989	99.9899
Real_201-3	5.9159e-05	0.0007718	99.9337	99.9349
Real_202+3	2.99787e-05	0.000337181	99.9834	99.9797
Real_202-3	7.97248e-05	0.00083711	99.9279	99.9283
Real_203+3	2.25425e-06	3.61826e-05	99.9996	99.9992
Real_203-3	1.92979e-05	0.000294775	99.9814	99.9749
Real_204+3	1.18988e-05	0.000135389	100	100
Real_204-3	8.09806e-06	0.000129602	99.9977	99.9996
Real_205+3	1.50964e-06	2.51376e-05	99.999	99.9978
Real_205-3	1.36468e-05	0.000219344	99.9958	99.9974
Real_206+3	2.07589e-06	3.28233e-05	99.998	99.9988
Real_206-3	8.64985e-06	0.000117553	99.9936	99.9986
Real_207+3	2.84132e-05	0.000315331	99.9878	99.9859
Real_207-3	0.000103959	0.00112871	99.9071	99.9131
Real_208+3	2.76198e-06	4.02085e-05	99.9993	99.9982
Real_208-3	1.76422e-05	0.000251953	99.9714	99.9793
Real_209+3	3.21771e-06	6.589e-05	100	99.9995
Real_209-3	4.2252e-06	9.06713e-05	99.9983	99.9981
Real_21+3	0.00425043	0.0377602	97.5544	97.727
Real_21-3	0.00871266	0.0757973	94.7161	94.8244
Real_210+3	2.21815e-05	0.000263987	99.9705	99.9728
Real_210-3	7.24403e-05	0.00075425	99.9463	99.9516
Real_211+3	3.69962e-05	0.000502027	99.9586	99.9516
Real_211-3	5.67816e-05	0.000745713	99.9539	99.9603
Real_212+3	1.5111e-05	0.00020444	99.9925	99.9886
Real_212-3	5.33073e-05	0.000694083	99.9645	99.9565
Real_213+3	6.34568e-05	0.000883586	99.9637	99.9682
Real_213-3	0.000106743	0.00149447	99.9	99.9168
Real_214+3	9.07111e-05	0.000654776	99.9802	99.9902
Real_214-3	0.000109947	0.000955463	99.933	99.9357
Real_215+3	6.3046e-05	0.000807554	99.9366	99.9039
Real_215-3	0.000140175	0.0017658	99.9093	99.8996
Real_216+3	5.67913e-06	0.000111269	99.9956	99.9945
Real_216-3	1.37801e-05	0.000240258	99.9865	99.9862
Real_217+3	1.97978e-05	0.000105124	100	100
Real_217-3	5.18858e-05	0.000325286	99.9739	99.9861
Real_218+3	4.26386e-05	0.000546788	99.9897	99.9811
Real_218-3	0.000125079	0.00149493	99.8966	99.9035
Real_219+3	1.39622e-05	0.000217741	99.9872	99.9843
Real_219-3	4.11303e-05	0.000546608	99.9786	99.9779
Real_22+3	0.00173604	0.0171731	99.034	99.1632
Real_22-3	0.0038079	0.0373232	97.3736	97.6617
Real_220+3	3.33106e-06	4.56702e-05	99.999	99.999
Real_220-3	1.03412e-05	0.000148301	99.9966	99.9968
Real_221+3	8.45337e-06	8.94279e-05	100	100
Real_221-3	3.43374e-05	0.000355415	99.9951	99.9961
Real_222+3	1.7175e-06	1.36126e-05	99.9996	99.9993
Real_222-3	1.9513e-05	0.000156993	99.9966	99.9981
Real_223+3	3.12684e-05	0.000348922	99.9869	99.9867
Real_223-3	5.3678e-05	0.000628638	99.9377	99.9361
Real_224+3	5.9672e-05	0.000515495	99.9917	99.9922
Real_224-3	6.80015e-05	0.000668121	99.9568	99.964
Real_225+3	4.76907e-06	8.5362e-05	99.9932	99.9931
Real_225-3	2.2507e-05	0.000350471	99.983	99.9788
Real_226+3	8.01895e-06	9.00943e-05	99.997	99.9967
Real_226-3	3.15122e-05	0.000364913	99.9765	99.9759
Real_227+3	1.35851e-05	0.000227501	99.9841	99.983
Real_227-3	3.12788e-05	0.000363723	99.9867	99.9916
Real_228+3	9.24071e-06	0.000186507	99.9868	99.9897
Real_228-3	3.09205e-05	0.000522062	99.96	99.9627
Real_229+3	2.58243e-06	2.85171e-05	100	99.9992
Real_229-3	1.61279e-05	0.000177739	99.9933	99.9927
Real_23+3	0.00157866	0.014176	99.1301	99.1945
Real_23-3	0.00337228	0.0301224	97.9235	98.1084
Real_230+3	3.90215e-05	0.000527812	99.9839	99.9858
Real_230-3	9.90128e-05	0.00126449	99.926	99.9412
Real_231+3	4.24483e-07	5.73877e-06	100	99.9996
Real_231-3	5.599e-06	7.62392e-05	99.9948	99.9965
Real_232+3	5.76488e-06	6.90857e-05	100	99.998
Real_232-3	5.11804e-05	0.000612426	99.9511	99.9497
Real_233+3	0.000604389	0.00659128	99.5334	99.5436
Real_233-3	0.00543754	0.0545052	96.4713	96.7444
Real_234+3	5.97936e-06	6.38359e-05	99.9975	99.9994
Real_234-3	4.48883e-05	0.000701164	99.9593	99.9677
Real_235+3	3.25483e-07	3.97176e-06	100	100
Real_235-3	4.33668e-05	0.000574706	99.9725	99.9768
Real_236+3	5.86785e-06	6.64534e-05	99.999	99.9985
Real_236-3	0.00011469	0.00134602	99.9123	99.9255
Real_237+3	0.00700269	0.056561	96.372	96.358
Real_237-3	0.00744594	0.0609796	95.6274	95.944
Real_238+3	0.00411174	0.0378772	97.5353	97.6571
Real_238-3	0.00622499	0.0557077	96.2713	96.4395
Real_239+3	0.00521513	0.0472412	96.5338	96.7074
Real_239-3	0.00599588	0.0531789	96.2409	96.4693
Real_24+3	0.00293476	0.0249913	98.5027	98.5279
Real_24-3	0.00574868	0.0493239	97.2346	97.3282
Real_240+3	0.00147519	0.0138846	99.0058	99.0415
Real_240-3	0.00175556	0.0165749	99.0532	99.0402
Real_241+3	0.00224266	0.020173	98.629	98.6489
Real_241-3	0.0025447	0.022928	98.5269	98.6275
Real_242+3	0.00108261	0.0106612	99.3378	99.2733
Real_242-3	0.0014653	0.0142797	99.0764	99.1856
Real_243+3	0.00143936	0.0134809	98.9883	99.0807
Real_243-3	0.00173873	0.0161179	99.1347	99.1615
Real_244+3	0.00024332	0.00274802	99.8789	99.8568
Real_244-3	0.00043774	0.00482868	99.6945	99.713
Real_245+3	0.000501038	0.00502591	99.737	99.745
Real_245-3	0.000809935	0.0079807	99.5843	99.5787
Real_246+3	0.000379252	0.0040878	99.7847	99.7886
Real_246-3	0.000520228	0.00558099	99.5921	99.6425
Real_247+3	0.00054157	0.00536497	99.7254	99.7174
Real_247-3	0.00110201	0.0108537	99.363	99.409
Real_248+3	0.000501885	0.00538947	99.6738	99.6483
Real_248-3	0.000730977	0.00776585	99.4985	99.5184
Real_249+3	0.00493818	0.0453443	97.0622	97.0425
Real_249-3	0.00596872	0.0539529	96.1907	96.4411
Real_25+3	0.0022407	0.0193721	98.5291	98.6836
Real_25-3	0.00353572	0.0307905	97.8818	98.1124
Real_250+3	0.00432089	0.0443041	97.1277	97.0478
Real_250-3	0.00646029	0.0634925	95.6978	96.0763
Real_251+3	7.90066e-05	0.000846002	99.9553	99.9549
Real_251-3	0.000107633	0.00116745	99.9387	99.9366
Real_252+3	0.00267627	0.0253887	98.392	98.3968
Real_252-3	0.0035614	0.0331438	97.6966	97.8172
Real_253+3	0.00214389	0.0209806	98.7435	98.7321
Real_253-3	0.00325107	0.0313743	97.9257	98.0531
Real_254+3	0.00100948	0.0106193	99.3144	99.3089
Real_254-3	0.00183928	0.0183255	98.8961	98.9883
Real_255+3	0.000610573	0.00667663	99.6302	99.62
Real_255-3	0.00113451	0.0121655	99.2847	99.3134
Real_256+3	0.000713234	0.00723704	99.5623	99.5935
Real_256-3	0.000963334	0.00981901	99.338	99.3167
Real_257+3	0.000450552	0.00488648	99.7297	99.7633
Real_257-3	0.000583546	0.00623807	99.5943	99.6494
Real_258+3	0.000828099	0.00925605	99.4758	99.4835
Real_258-3	0.0013821	0.015319	99.0549	99.1173
Real_259+3	0.000556624	0.0057305	99.6229	99.6171
Real_259-3	0.00108103	0.0103542	99.2899	99.3976
Real_26+3	0.00301235	0.0242753	98.3393	98.4464
Real_26-3	0.00377433	0.0305366	98.0285	98.1076
Real_260+3	0.000444725	0.00457073	99.6932	99.726
Real_260-3	0.00116192	0.0113804	99.3336	99.444
Real_261+3	0.000607093	0.00588493	99.5644	99.5373
Real_261-3	0.000908185	0.0090019	99.4203	99.494
Real_262+3	0.00164351	0.0134135	99.2578	99.2449
Real_262-3	0.0021803	0.018851	98.9312	98.976
Real_263+3	0.000420921	0.00460841	99.769	99.7433
Real_263-3	0.000783331	0.00846296	99.4275	99.488
Real_264+3	0.000342023	0.00352136	99.7917	99.7833
Real_264-3	0.000420492	0.00428003	99.7448	99.7975
Real_265+3	0.000329346	0.00365071	99.7331	99.737
Real_265-3	0.000475792	0.00523075	99.7521	99.7484
Real_266+3	0.000657501	0.00728608	99.5239	99.4874
Real_266-3	0.00112124	0.0120758	99.1939	99.2358
Real_267+3	0.000521907	0.00559867	99.6482	99.6534
Real_267-3	0.00084229	0.00901253	99.4089	99.3799
Real_268+3	0.000785705	0.00775144	99.4906	99.4964
Real_268-3	0.00144703	0.014146	99.0182	99.0281
Real_269+3	0.000262925	0.00316467	99.7852	99.7759
Real_269-3	0.000483683	0.00567638	99.7605	99.7442
Real_27+3	0.00146197	0.0122662	99.2829	99.2676
Real_27-3	0.00232408	0.0199729	98.7901	98.9232
Real_270+3	0.000259556	0.00289635	99.7979	99.8246
Real_270-3	0.000429547	0.00495491	99.6754	99.6605
Real_271+3	0.000152675	0.00191824	99.9144	99.9181
Real_271-3	0.000284208	0.00337356	99.7932	99.8155
Real_272+3	0.000430107	0.00468768	99.7441	99.7042
Real_272-3	0.000953717	0.00980768	99.4403	99.4577
Real_273+3	0.000786243	0.00660439	99.6052	99.6057
Real_273-3	0.000822948	0.00710393	99.6531	99.5799
Real_274+3	0.000366339	0.00433441	99.7189	99.7341
Real_274-3	0.000573226	0.00653346	99.6267	99.6445
Real_275+3	0.000435213	0.00490952	99.6374	99.6044
Real_275-3	0.000767437	0.00841388	99.4297	99.519
Real_276+3	0.000335337	0.00356598	99.7976	99.7875
Real_276-3	0.00052594	0.00562322	99.6162	99.6348
Real_277+3	0.000248104	0.00264568	99.8029	99.8211
Real_277-3	0.000343025	0.00383253	99.7171	99.7267
Real_278+3	0.000407167	0.00428943	99.7294	99.7871
Real_278-3	0.000640329	0.00664962	99.6036	99.6633
Real_279+3	0.000137256	0.00138814	99.9498	99.9549
Real_279-3	0.000200829	0.00204633	99.8738	99.9006
Real_28+3	0.000790356	0.00704456	99.6114	99.6012
Real_28-3	0.00126004	0.0113053	99.2057	99.2577
Real_280+3	0.000486019	0.00392623	99.7872	99.7993
Real_280-3	0.000555336	0.00466538	99.7438	99.7658
Real_281+3	0.000388827	0.00413843	99.7937	99.8095
Real_281-3	0.00052632	0.00560795	99.6552	99.6756
Real_282+3	0.000275947	0.00313126	99.8182	99.8165
Real_282-3	0.0003601	0.00405166	99.7342	99.7705
Real_283+3	0.000305134	0.00326838	99.815	99.8077
Real_283-3	0.000455254	0.00501506	99.699	99.7153
Real_284+3	0.000462061	0.00501141	99.7372	99.6899
Real_284-3	0.000699216	0.00745613	99.4594	99.4904
Real_285+3	0.000332137	0.00314088	99.7599	99.7655
Real_285-3	0.000451083	0.00433481	99.8214	99.7995
Real_286+3	0.000616829	0.00552227	99.7252	99.7532
Real_286-3	0.000752447	0.00699254	99.6657	99.6602
Real_287+3	0.000865496	0.00776741	99.5791	99.6242
Real_287-3	0.00110115	0.0103784	99.4115	99.367
Real_288+3	0.000402987	0.00420491	99.7535	99.773
Real_288-3	0.000543461	0.00568507	99.6762	99.6746
Real_289+3	0.000338711	0.00374314	99.8048	99.7985
Real_289-3	0.000670243	0.00730416	99.5279	99.5824
Real_29+3	0.0024667	0.0207558	98.5973	98.6102
Real_29-3	0.00320094	0.0266989	98.2334	98.3322
Real_290+3	0.00104881	0.0105456	99.4717	99.4489
Real_290-3	0.00238125	0.0227716	98.5829	98.6351
Real_291+3	0.00119891	0.0118936	99.3305	99.3044
Real_291-3	0.00157784	0.0153108	99.0899	99.147
Real_292+3	9.72471e-05	0.00104209	99.9352	99.9268
Real_292-3	0.000195008	0.00206361	99.8909	99.8965
Real_293+3	0.000261306	0.00288259	99.8215	99.8357
Real_293-3	0.000444927	0.00480091	99.7093	99.7123
Real_3+3	0.00794232	0.0741867	95.0006	95.2434
Real_3-3	0.0104658	0.0936005	93.5568	93.5585
Real_30+3	0.000788379	0.00790523	99.5454	99.5596
Real_30-3	0.00097118	0.00977615	99.4179	99.4084
Real_31+3	0.000512497	0.0047331	99.7064	99.7301
Real_31-3	0.000963415	0.00887276	99.4799	99.4969
Real_32+3	0.00259147	0.0191439	98.9821	99.0111
Real_32-3	0.00270721	0.0204276	98.7637	98.8839
Real_33+3	0.000552826	0.00450687	99.7464	99.7972
Real_33-3	0.000822533	0.00699977	99.5737	99.5933
Real_34+3	0.000165795	0.00148675	99.8921	99.9215
Real_34-3	0.000257747	0.0023102	99.8682	99.8909
Real_35+3	0.000302588	0.00279093	99.8191	99.7955
Real_35-3	0.000479675	0.00450896	99.7128	99.6406
Real_36+3	0.000233458	0.0019364	99.8648	99.8848
Real_36-3	0.000369957	0.00309074	99.833	99.8209
Real_37+3	0.000488197	0.00456242	99.7216	99.7339
Real_37-3	0.00167251	0.0156101	98.8952	98.9047
Real_38+3	0.00246963	0.0216078	98.6805	98.8253
Real_38-3	0.0035877	0.0311949	98.0102	98.0879
Real_39+3	0.00214094	0.0180533	98.8213	98.8245
Real_39-3	0.00320494	0.0266842	98.3951	98.3719
Real_4+3	0.00261168	0.0238637	98.3119	98.4732
Real_4-3	0.00270686	0.0247389	98.5184	98.406
Real_40+3	0.00140067	0.0110452	99.307	99.3717
Real_40-3	0.00166895	0.0135008	99.1423	99.2213
Real_41+3	6.89258e-05	0.000593244	99.975	99.974
Real_41-3	0.000120123	0.00103299	99.9273	99.9438
Real_42+3	0.000154864	0.00135386	99.911	99.9183
Real_42-3	0.000240377	0.00210558	99.8251	99.8583
Real_43+3	0.000283553	0.00268313	99.7809	99.8603
Real_43-3	0.000498562	0.00472108	99.7192	99.755
Real_44+3	0.00428863	0.0344125	98.1246	98.0885
Real_44-3	0.00583907	0.0467686	97.0659	97.2819
Real_45+3	8.08819e-05	0.000743978	99.9368	99.9395
Real_45-3	0.000148821	0.00136518	99.926	99.9243
Real_46+3	0.00274556	0.0205538	98.9015	99.0186
Real_46-3	0.00286885	0.0221537	98.7668	98.8551
Real_47+3	0.000312935	0.00297587	99.7649	99.7944
Real_47-3	0.000524494	0.00497763	99.6887	99.6859
Real_48+3	0.000279998	0.00237304	99.8397	99.8262
Real_48-3	0.000470344	0.00398386	99.8108	99.8021
Real_49+3	0.000194669	0.00167951	99.8951	99.8932
Real_49-3	0.000332855	0.00286508	99.7691	99.78
Real_5+3	0.00679614	0.0596973	95.9812	96.2685
Real_5-3	0.00838277	0.0714646	95.1443	95.2634
Real_50+3	0.000236015	0.00201712	99.9009	99.8861
Real_50-3	0.000395247	0.00338442	99.8012	99.8354
Real_51+3	0.00177587	0.017695	98.862	98.99
Real_51-3	0.00402883	0.0406096	97.3451	97.3412
Real_52+3	0.00449738	0.0311251	98.5407	98.5868
Real_52-3	0.00826906	0.0650227	96.2362	96.3235
Real_53+3	0.00157405	0.015532	99.2653	99.2218
Real_53-3	0.00358999	0.0336109	97.5897	97.8093
Real_54+3	0.00335877	0.0259617	98.4009	98.4328
Real_54-3	0.00418644	0.0353638	97.8127	97.9728
Real_55+3	0.00385047	0.0324964	97.9273	97.9693
Real_55-3	0.00611711	0.0507808	97.0809	97.3107
Real_56+3	0.00131745	0.0123535	99.2249	99.2648
Real_56-3	0.00212817	0.0198784	98.6859	98.8664
Real_57+3	0.00106694	0.0099142	99.5581	99.5813
Real_57-3	0.00189424	0.0171563	98.953	99.0505
Real_58+3	0.00300966	0.0254893	98.4324	98.4492
Real_58-3	0.00397366	0.0342444	97.8463	97.9215
Real_59+3	0.00179827	0.01617	99.0165	99.0871
Real_59-3	0.00253529	0.0227621	98.6669	98.7811
Real_6+3	0.00420908	0.0370158	97.4662	97.5003
Real_6-3	0.00414442	0.0367348	97.4052	97.4011
Real_60+3	0.00195042	0.0180022	98.8038	98.7904
Real_60-3	0.00301824	0.0280232	98.387	98.4825
Real_61+3	0.00220858	0.0216364	98.695	98.5873
Real_61-3	0.00309809	0.0300232	98.0563	98.2041
Real_62+3	0.00143422	0.0135333	99.1473	99.2184
Real_62-3	0.00189384	0.0181336	98.8757	99.0378
Real_63+3	0.00101749	0.0099963	99.3054	99.3319
Real_63-3	0.00151782	0.0145251	99.1219	99.0843
Real_64+3	0.0020939	0.0174798	98.9095	99.0633
Real_64-3	0.00282118	0.023609	98.6983	98.7189
Real_65+3	0.00237475	0.0211143	98.7936	98.8139
Real_65-3	0.00286904	0.0260255	98.3837	98.6123
Real_66+3	0.000869487	0.00826279	99.5234	99.4761
Real_66-3	0.00122297	0.0115102	99.2539	99.3168
Real_67+3	0.000266917	0.00251554	99.8904	99.8598
Real_67-3	0.000788548	0.00773094	99.6215	99.6146
Real_68+3	0.000531835	0.00522939	99.7151	99.7618
Real_68-3	0.00136531	0.0129379	99.2852	99.2628
Real_69+3	0.00128785	0.0114597	99.4475	99.4881
Real_69-3	0.00290022	0.0253613	98.811	98.8941
Real_7+3	0.00477324	0.0407184	97.4058	97.4193
Real_7-3	0.00476063	0.0410964	97.2139	97.2931
Real_70+3	0.00103582	0.00953647	99.3898	99.4393
Real_70-3	0.00135757	0.0129909	99.0736	99.178
Real_71+3	0.00153031	0.0132638	99.2345	99.2541
Real_71-3	0.00224236	0.0191803	98.7431	98.8076
Real_72+3	0.000866891	0.00803041	99.4544	99.4915
Real_72-3	0.00127004	0.0117885	99.2056	99.2437
Real_73+3	0.00208107	0.0166351	99.0928	99.1437
Real_73-3	0.00285179	0.0230426	98.5306	98.5937
Real_74+3	0.000544017	0.00496943	99.7399	99.7797
Real_74-3	0.000772642	0.00716666	99.6027	99.6356
Real_75+3	0.000528527	0.00501301	99.7687	99.7712
Real_75-3	0.000753173	0.00702826	99.6635	99.6969
Real_76+3	0.0012414	0.0125122	99.2329	99.1838
Real_76-3	0.00159407	0.0161104	99.002	99.073
Real_77+3	0.000526296	0.0054712	99.6845	99.6597
Real_77-3	0.00077284	0.00786195	99.4617	99.4767
Real_78+3	0.000694721	0.00636543	99.6649	99.617
Real_78-3	0.000988936	0.00909744	99.5272	99.5473
Real_79+3	0.000830242	0.00702308	99.6408	99.6225
Real_79-3	0.00113781	0.00953941	99.3777	99.4693
Real_8+3	0.00372206	0.032457	97.948	98.0806
Real_8-3	0.00366701	0.0322255	97.777	97.7858
Real_80+3	0.00252362	0.0199001	98.8852	98.9237
Real_80-3	0.0065352	0.0582848	96.0293	96.2892
Real_81+3	0.000951683	0.00836208	99.502	99.5891
Real_81-3	0.00204078	0.0180091	98.8891	98.8789
Real_82+3	0.00107778	0.00985417	99.3298	99.3712
Real_82-3	0.00221236	0.0199423	98.8022	98.8416
Real_83+3	0.000947324	0.00994875	99.3309	99.3624
Real_83-3	0.00222205	0.0225124	98.6184	98.6085
Real_84+3	0.00447524	0.0413478	96.7888	97.0816
Real_84-3	0.00608021	0.0552534	96.4455	96.5007
Real_85+3	0.0369218	0.291101	79.5101	80.5381
Real_85-3	0.0359863	0.318414	76.6329	76.9812
Real_86+3	0.0401942	0.313565	77.5879	78.4313
Real_86-3	0.0305017	0.262826	80.9073	81.3312
Real_87+3	0	0	100	100
Real_87-3	0	0	100	100
Real_88+3	0	0	100	100
Real_88-3	0	0	100	100
Real_89+3	0.00414372	0.0347293	97.7807	97.9626
Real_89-3	0.00427552	0.0360879	97.3854	97.501
Real_9+3	0.008116	0.0717868	95.1811	95.5509
Real_9-3	0.00987514	0.0868877	93.9393	94.0018
Real_90+3	0.00207118	0.0174456	99.1896	99.272
Real_90-3	0.00295427	0.0243001	98.9036	98.9587
Real_91+3	2.65426e-05	0.000157088	99.9992	99.9966
Real_91-3	7.977e-05	0.000706599	99.954	99.9436
Real_92+3	2.77793e-05	0.000164022	99.9992	99.9966
Real_92-3	0.000153026	0.00173324	99.8967	99.8861
Real_93+3	6.38332e-05	0.000636997	99.9537	99.9766
Real_93-3	0.000408162	0.00416926	99.7305	99.7616
Real_94+3	0	0	100	100
Real_94-3	0	0	100	100
Real_95+3	0.00450209	0.0396827	97.6464	97.6644
Real_95-3	0.00751614	0.064373	96.286	96.3309
Real_96+3	0.00476868	0.0414989	97.3168	97.6746
Real_96-3	0.00537373	0.0465462	97.0327	96.825
Real_97+3	0.074365	0.577225	54.8839	58.0951
Real_97-3	0.0206494	0.186532	87.6425	88.1328
Real_98+3	0.0139911	0.136193	90.77	91.0104
Real_98-3	0.111465	0.832253	22.0105	35.994
Real_99+3	0.00364036	0.0321792	97.9676	98.2478
Real_99-3	0.00528758	0.0466958	96.9932	96.9964

## Sheet: Parameter_SA
	Score:			Sigma:
Independent Index	Figure Index	Parameter	Parameter File	Parameter Value	Parameter Error	Sigma	+3	-3	Average	Rank	Source
0	1	AA UU	rna.stack.dg	-0.911554	0.0415344	0.5	0.0220924	0.0257501	0.0239213	14	Stack Regression
1	2	AC UG	rna.stack.dg	-2.30706	0.0697835	0.5	0.0275538	0.0277505	0.0276522	13	Stack Regression
2	3	AG UC	rna.stack.dg	-2.06289	0.0688755	0.5	0.0297765	0.0279407	0.0288586	10	Stack Regression
3	4	AG UU	rna.stack.dg	-0.701962	0.26569	0.5	0.0123292	0.0206645	0.0164969	29	Stack Regression
4	5	AU UA	rna.stack.dg	-1.13278	0.086978	0.5	0.0124723	0.01538	0.0139261	38	Stack Regression
5	6	AU UG	rna.stack.dg	-1.29624	0.202441	0.5	0.013945	0.0230347	0.0184899	26	Stack Regression
6	7	CA GU	rna.stack.dg	-2.08494	0.0693022	0.5	0.02899	0.0271775	0.0280837	11	Stack Regression
7	8	CC GG	rna.stack.dg	-3.30926	0.0697961	0.5	0.0351163	0.0322436	0.03368	7	Stack Regression
8	9	CG GC	rna.stack.dg	-2.31883	0.0932679	0.5	0.021036	0.0198342	0.0204351	23	Stack Regression
9	10	CG GU	rna.stack.dg	-1.29981	0.205319	0.5	0.0168793	0.025282	0.0210806	22	Stack Regression
10	11	CU GG	rna.stack.dg	-2.07173	0.213908	0.5	0.02033	0.0258753	0.0231027	16	Stack Regression
11	12	GA CU	rna.stack.dg	-2.39102	0.0649977	0.5	0.0295904	0.0283434	0.0289669	9	Stack Regression
12	13	GC CG	rna.stack.dg	-3.50817	0.0897753	0.5	0.0220746	0.0202314	0.021153	21	Stack Regression
13	14	GG CU	rna.stack.dg	-1.69721	0.224313	0.5	0.0184735	0.0274361	0.0229548	17	Stack Regression
14	15	GU CG	rna.stack.dg	-2.32166	0.209733	0.5	0.0234572	0.0320231	0.0277401	12	Stack Regression
15	16	GA UU	rna.stack.dg	-1.06538	0.234761	0.5	0.0125481	0.0205873	0.0165677	28	Stack Regression
16	17	GG UU	rna.stack.dg	0.106	0.80617	0.5	0.00471857	0.00999439	0.00735648	66	Stack Regression
17	18	GU UG	rna.stack.dg	1.40794	0.474022	0.5	0.000453491	0.00177606	0.00111478	128	Stack Regression
18	19	UA AU	rna.stack.dg	-1.2884	0.10356	0.5	0.0132394	0.0156081	0.0144237	35	Stack Regression
19	20	UG AU	rna.stack.dg	-0.9233	0.25426	0.5	0.0113691	0.0198209	0.015595	31	Stack Regression
20	21	UG GU	rna.stack.dg	0.074155	0.404149	0.5	0.00404763	0.00753809	0.00579286	72	Stack Regression
21	22	AA U	rna.dangle.dg	-0.740512	0.287832	0.5	0.0056201	0.0181272	0.0118736	44	(D1-R73)/2
22	23	AC U	rna.dangle.dg	-0.493327	0.302195	0.5	0.00225513	0.00808216	0.00516864	77	(D2-R73)/2
23	24	AG U	rna.dangle.dg	-0.832242	0.290373	0.5	0.00213473	0.00766797	0.00490135	80	(D3-R73)/2
24	25	AU U	rna.dangle.dg	-0.57519	0.296456	0.5	0.00394925	0.0117482	0.00784873	64	(D4-R73)/2
25	26	CA G	rna.dangle.dg	-1.73126	0.165436	0.5	0.00450861	0.0151042	0.00980641	54	(D15-R20+D16-R8)/4
26	27	CC G	rna.dangle.dg	-0.777776	0.131656	0.5	0.0082477	0.0189196	0.0135837	40	(D17-R20+D18-R8)/4
27	28	CG G	rna.dangle.dg	-1.64207	0.163083	0.5	0.00292821	0.0111327	0.00703046	67	(D19-R20+D20-R8)/4
28	29	CU G	rna.dangle.dg	-1.19374	0.125787	0.5	0.00174865	0.00907481	0.00541173	75	(D21-R9+D22-R20+D23-R8)/6
29	30	GA C	rna.dangle.dg	-1.1486	0.105089	0.5	0.00690259	0.0208597	0.0138811	39	(D9-R5+D10-R5)/4
30	31	GC C	rna.dangle.dg	-0.351695	0.11472	0.5	0.00248739	0.00657759	0.00453249	83	(D11-R5)/2
31	32	GG C	rna.dangle.dg	-1.25019	0.158785	0.5	0.00090713	0.00564043	0.00327378	94	(D12-R5)/2
32	33	GU C	rna.dangle.dg	-0.619224	0.0914588	0.5	0.0131542	0.0164173	0.0147858	34	(D13-R5+D14-R5)/4
33	34	UA A	rna.dangle.dg	-0.66354	0.115155	0.5	0.00131566	0.00679719	0.00405642	87	(D5-R32)/2
34	35	UC A	rna.dangle.dg	-0.126222	0.102623	0.5	0.000403317	0.00324248	0.0018229	115	(D6-R32)/2
35	36	UG A	rna.dangle.dg	-0.66354	0.115155	0.5	0.000680485	0.00434389	0.00251219	106	(D7-R32)/2
36	37	UU A	rna.dangle.dg	-0.09098	0.106728	0.5	0.000536702	0.00387736	0.00220703	109	(D8-R32)/2
37	38	A UA	rna.dangle.dg	-0.298402	0.286875	0.5	0.000594494	0.00450746	0.00255098	104	(D24-R73)/2
38	39	A UC	rna.dangle.dg	-0.136927	0.152043	0.5	0.00546287	0.0173627	0.0114128	46	(D25-R68)/2
39	40	C GA	rna.dangle.dg	-0.219833	0.163085	0.5	0.00442596	0.0148563	0.00964113	56	(D34-R8)/2
40	41	C GC	rna.dangle.dg	-0.274386	0.122556	0.5	0.00437439	0.00910881	0.0067416	69	(D35-R12+D36-R20)/4
41	42	C GG	rna.dangle.dg	0.04022	0.119236	0.5	0.000143723	0.00135998	0.000751851	148	(D37-R20)/2
42	43	C GU	rna.dangle.dg	-0.0749513	0.103626	0.5	0.000377477	0.00305516	0.00171632	117	(D38-R12+D39-R20)/4
43	44	G CA	rna.dangle.dg	-0.52519	0.133439	0.5	0.000565959	0.00434212	0.00245404	107	(D30-R5)/2
44	45	G CC	rna.dangle.dg	-0.35977	0.173049	0.5	0.00916704	0.0219594	0.0155632	32	(D31-R5)/2
45	46	G CG	rna.dangle.dg	-0.173495	0.127603	0.5	0.000158617	0.00155311	0.000855863	138	(D32-R5)/2
46	47	G CU	rna.dangle.dg	-0.14737	0.109998	0.5	0.0114896	0.0140232	0.0127564	42	(D33-R5)/2
47	48	U AA	rna.dangle.dg	-0.326407	0.121018	0.5	0.000665326	0.00503448	0.0028499	98	(D26-R32)/2
48	49	U AC	rna.dangle.dg	-0.250185	0.11953	0.5	0.000593748	0.00448619	0.00253997	105	(D27-R32)/2
49	50	U AG	rna.dangle.dg	-0.35451	0.117475	0.5	0.000409989	0.00346089	0.00193544	114	(D28-R32)/2
50	51	U AU	rna.dangle.dg	-0.18759	0.121134	0.5	0.000502458	0.00381011	0.00215628	110	(D29-R32)/2
51	52	AA UA	rna.tstack.dg	-0.751977	0.295857	0.5	0.00207946	0.00613936	0.00410941	86	(T1-R70)/2
52	53	AC UA	rna.tstack.dg	-0.621713	0.299143	0.5	0.00552677	0.0125837	0.00905524	58	(T2-R70)/2
53	54	AG UA	rna.tstack.dg	-0.801413	0.30886	0.5	0.00189033	0.00559289	0.00374161	91	(T3-R70)/2
54	55	CA GA	rna.tstack.dg	-1.50133	0.196596	0.5	0.00742414	0.012261	0.00984257	52	(T4-R20)/2
55	56	CA GC	rna.tstack.dg	-1.46298	0.247369	0.5	0.00663868	0.0182291	0.0124339	43	(T5-R8)/2
56	57	CA GG	rna.tstack.dg	-1.44399	0.228554	0.5	0.00237989	0.00747056	0.00492523	78	(T6-R20)/2
57	58	CC GU	rna.tstack.dg	-0.761563	0.203739	0.5	0.00170653	0.00581209	0.00375931	90	(T7-R8)/2
58	59	CG GA	rna.tstack.dg	-1.41974	0.197779	0.5	0.00598672	0.0117331	0.00885991	59	(T33-R20)/2
59	60	CG GG	rna.tstack.dg	-1.53582	0.199642	0.5	0.00340733	0.00797215	0.00568974	73	(T8-R20)/2
60	61	CU GC	rna.tstack.dg	-1.35762	0.240136	0.5	0.00337445	0.00861822	0.00599634	71	(T9-R8)/2
61	62	CU GU	rna.tstack.dg	-1.18742	0.170879	0.5	0.00421595	0.0093241	0.00677003	68	(T10-R20)/2
62	63	GA CA	rna.tstack.dg	-1.09051	0.160236	0.5	0.00349279	0.00850231	0.00599755	70	(T11-R5)/2
63	64	GA CG	rna.tstack.dg	-1.23891	0.171994	0.5	0.00215237	0.00745058	0.00480147	81	(T12-R5)/2
64	65	GC CA	rna.tstack.dg	-1.08657	0.143241	0.5	0.00532702	0.013118	0.00922251	57	(T13-R5)/2
65	66	GG CA	rna.tstack.dg	-1.57933	0.192287	0.5	0.00649745	0.0111995	0.00884847	61	(T14-R5)/2
66	67	GG CG	rna.tstack.dg	-1.46673	0.190193	0.5	0.0020339	0.00593862	0.00398626	88	(T15-R5)/2
67	68	GA UA	rna.tstack.dg	-0.2485	0.227352	0.5	0.000318665	0.00163173	0.000975198	134	(T16-R41)/2
68	69	GG UA	rna.tstack.dg	-0.584493	0.332103	0.5	0.000593294	0.00193076	0.00126203	123	(T17-R40)/2
69	70	GU UU	rna.tstack.dg	-0.57105	0.354277	0.5	0.00145257	0.00399813	0.00272535	102	(T18-R40)/2
70	71	UA AA	rna.tstack.dg	-0.941545	0.132211	0.5	0.00259636	0.00659382	0.00459509	82	(T19-R32)/2
71	72	UA AC	rna.tstack.dg	-0.760345	0.11703	0.5	0.00345493	0.0124308	0.00794287	63	(T20-R32)/2
72	73	UA AG	rna.tstack.dg	-1.09973	0.125037	0.5	0.00196042	0.00706536	0.00451289	85	(T21-R32)/2
73	74	UC AA	rna.tstack.dg	-0.717767	0.117243	0.5	0.00503525	0.0146329	0.00983408	53	(T22-R32)/2
74	75	UC AC	rna.tstack.dg	-0.587317	0.113397	0.5	0.00126407	0.00430615	0.00278511	99	(T23-R32)/2
75	76	UC AU	rna.tstack.dg	-0.462877	0.112509	0.5	0.0012793	0.00424838	0.00276384	101	(T24-R32)/2
76	77	UG AA	rna.tstack.dg	-1.11373	0.147983	0.5	0.00320095	0.00744777	0.00532436	76	(T25-R32)/2
77	78	UG AG	rna.tstack.dg	-1.14625	0.126197	0.5	0.00119045	0.00437105	0.00278075	100	(T26-R32)/2
78	79	UU AC	rna.tstack.dg	-0.590132	0.122164	0.5	0.00163551	0.00554417	0.00358984	93	(T27-R32)/2
79	80	UU AU	rna.tstack.dg	-0.5109	0.135675	0.5	0.00203261	0.00580066	0.00391663	89	(T28-R32)/2
80	81	UA GA	rna.tstack.dg	-1.27413	0.259011	0.5	0.00252362	0.0065352	0.00452941	84	(T29-(Sym+NN95+2*NN90+2*NN15+NN9))/2
81	82	UG GA	rna.tstack.dg	-0.479602	0.305821	0.5	0.00115558	0.00342082	0.0022882	108	(T30-R43)/2
82	83	UG GG	rna.tstack.dg	-0.814193	0.354204	0.5	0.00120945	0.0029267	0.00206807	111	(T31-R42)/2
83	84	UU GU	rna.tstack.dg	-0.404043	0.315163	0.5	0.00107558	0.00302217	0.00204887	112	(T32-R42)/2
84	85	Internal Loop Asymmetry	rna.miscloop.dg	0.597108	0.0625535	0.5	0.0169537	0.0995194	0.0582365	2	Internal Loop Regression 1
85	86	Multibranch Loop – Offset	rna.miscloop.dg	9.19211	1.17836	0.5	0.0155093	0.016021	0.0157651	30	Multibranch Loop Regression
86	87	Multibranch Loop – Helix Penalty	rna.miscloop.dg	-0.455574	0.310291	0.5	0.0631455	0.0453935	0.0542695	3	Multibranch Loop Regression
87	88	Multibranch Loop - Asym	rna.miscloop.dg	0.672809	0.204891	0.5	0	0	0	291	Multibranch Loop Regression
88	89	Multibranch Loop - Strain	rna.miscloop.dg	2.29683	0.532796	0.5	0	0	0	291	Multibranch Loop Regression
89	90	AU End	rna.miscloop.dg	0.402169	0.0442537	0.5	0.038993	0.0550847	0.0470389	5	Stack Regression
90	91	GGG Hairpin Bonus	rna.miscloop.dg	-1.97581	0.257689	0.5	0.0032603	0.00655674	0.00490852	79	Hairpin Regression
91	92	C Hairpin Slope	rna.miscloop.dg	0.291522	0.173571	0.5	2.79376e-05	0.000626135	0.000327036	180	Hairpin Regression
92	93	C Hairpin Intercept	rna.miscloop.dg	1.67414	1.12812	0.5	2.46233e-05	5.85824e-05	4.16028e-05	247	Hairpin Regression
93	94	C Hairpin of 3	rna.miscloop.dg	1.41361	0.669276	0.5	5.89035e-05	0.000247967	0.000153435	202	Hairpin Regression
94	95	Intermolecular Initiation	rna.miscloop.dg	4.21307	0.251729	0.5	0	0	0	291	Stack Regression
95	96	Bonus for Single C Bulges Adjacent to C	rna.miscloop.dg	-0.941657	0.291681	0.5	0.006385	0.0153141	0.0108495	48	Bulge Loop Regression
96	97	Bulge 1	rna.loop.dg	3.89256	0.0830553	0.5	0.0212097	0.0422174	0.0317136	8	Bulge Loop Regression
97	98	Bulge 2	rna.loop.dg	2.94642	0.473065	0.5	0.080736	0.0219366	0.0513363	4	(B4+B5+B6+B12+B13+B18-3*(R76+R157)/2-2*D42-D43+6*NN8)/6
98	99	Bulge 3	rna.loop.dg	3.24908	0.712666	0.5	0.0132367	0.103685	0.0584609	1	(B7+B8+B9+B14+B15+B19-3*(R76+R157)/2-2*D42-D43+6*NN8)/6
99	100	Hairpin 3	rna.loop.dg	5.81601	0.21338	0.5	0.0064759	0.0154633	0.0109696	47	Hairpin Regression
100	101	Internal 4	rna.loop.dg	1.00476	0.0931422	0.5	0.00518312	0.014886	0.0100346	49	Internal Loop Regression 1
101	102	Hairpin 4	rna.loop.dg	5.64024	0.155597	0.5	0.0174129	0.0268948	0.0221538	19	Hairpin Regression
102	103	Internal 5	rna.loop.dg	1.85685	0.1544	0.5	0.00516399	0.0149029	0.0100334	50	Internal Loop Regression 1
103	104	Hairpin 5	rna.loop.dg	5.92451	0.190408	0.5	0.00881953	0.0195518	0.0141857	36	Hairpin Regression
104	105	Internal 6	rna.loop.dg	1.88397	0.106081	0.5	0.0158406	0.0283144	0.0220775	20	Internal Loop Regression 1
105	106	Hairpin 6	rna.loop.dg	5.47622	0.143481	0.5	0.0118264	0.0218825	0.0168544	27	Hairpin Regression
106	107	Hairpin 7	rna.loop.dg	6.1889	0.203665	0.5	0.0201726	0.020272	0.0202223	24	Hairpin Regression
107	108	Hairpin 8	rna.loop.dg	5.47247	0.214433	0.5	0.00889606	0.0148096	0.0118528	45	Hairpin Regression
108	109	Hairpin 9	rna.loop.dg	6.5434	0.237046	0.5	0.0115277	0.018891	0.0152093	33	Hairpin Regression
109	110	CAACG	rna.triloop.dg	6.68589	0.305043	0.5	2.05253e-05	7.81745e-05	4.93499e-05	239	H126-(NN8+NN12+NN2)
110	111	GUUAC	rna.triloop.dg	6.84772	0.453716	0.5	2.21596e-05	7.04719e-05	4.63158e-05	241	H127-(NN8+NN12+NN3)
111	112	CUACGG	rna.tloop.dg	2.96375	0.226686	0.5	6.73401e-05	0.000146513	0.000106927	214	(H132+H150-(2*NN8+NN12+NN2+NN13))/2
112	113	CUCCGG	rna.tloop.dg	2.86644	0.321478	0.5	6.77392e-05	9.88516e-05	8.32954e-05	223	H133-(NN8+NN13)
113	114	CUUCGG	rna.tloop.dg	2.21309	0.229595	0.5	0.000288714	0.000237591	0.000263152	184	(H134+H148-(2*NN8+NN12+NN2+NN13))/2
114	115	CUUUGG	rna.tloop.dg	3.96049	0.24999	0.5	2.81748e-05	5.71151e-05	4.26449e-05	245	(H141+H149-2*(NN8+NN12+NN2))/2
115	116	CCAAGG	rna.tloop.dg	3.36744	0.421898	0.5	6.79546e-05	9.67281e-05	8.23414e-05	224	H152-(NN8+NN12+NN2)+((H134+H148+H132+H150)/2+H133-2*NN13-(H167+H164+H165)+2*(NN12+NN2))/3
116	117	CCCAGG	rna.tloop.dg	3.55785	0.421635	0.5	6.95821e-05	0.000204528	0.000137055	203	H153-(NN8+NN12+NN2)+((H134+H148+H132+H150)/2+H133-2*NN13-(H167+H164+H165)+2*(NN12+NN2))/3
117	118	CCGAGG	rna.tloop.dg	3.71782	0.415135	0.5	4.22076e-06	3.58709e-05	2.00458e-05	265	H154-(NN8+NN12+NN2)+((H134+H148+H132+H150)/2+H133-2*NN13-(H167+H164+H165)+2*(NN12+NN2))/3
118	119	CCUAGG	rna.tloop.dg	3.74733	0.401691	0.5	6.89133e-06	1.55306e-05	1.1211e-05	277	H155-(NN8+NN12+NN2)+((H134+H148+H132+H150)/2+H133-2*NN13-(H167+H164+H165)+2*(NN12+NN2))/3
119	120	CCACGG	rna.tloop.dg	3.82327	0.402885	0.5	3.30618e-05	8.28863e-05	5.79741e-05	235	H156-(NN8+NN12+NN2)+((H134+H148+H132+H150)/2+H133-2*NN13-(H167+H164+H165)+2*(NN12+NN2))/3
120	121	CCGCGG	rna.tloop.dg	3.71725	0.420154	0.5	2.89079e-06	2.16459e-05	1.22683e-05	274	H158-(NN8+NN12+NN2)+((H134+H148+H132+H150)/2+H133-2*NN13-(H167+H164+H165)+2*(NN12+NN2))/3
121	122	CCUCGG	rna.tloop.dg	2.62082	0.415076	0.5	4.00165e-05	0.000127846	8.39313e-05	222	H159-(NN8+NN12+NN2)+((H134+H148+H132+H150)/2+H133-2*NN13-(H167+H164+H165)+2*(NN12+NN2))/3
122	123	CUAAGG	rna.tloop.dg	3.77233	0.423135	0.5	0.000114565	0.000143994	0.00012928	206	H160-(NN8+NN12+NN2)+((H134+H148+H132+H150)/2+H133-2*NN13-(H167+H164+H165)+2*(NN12+NN2))/3
123	124	CUCAGG	rna.tloop.dg	3.77985	0.417578	0.5	5.73907e-05	0.000115293	8.63418e-05	221	H161-(NN8+NN12+NN2)+((H134+H148+H132+H150)/2+H133-2*NN13-(H167+H164+H165)+2*(NN12+NN2))/3
124	125	CUUAGG	rna.tloop.dg	3.62158	0.409715	0.5	8.66371e-05	0.000142168	0.000114403	210	H163-(NN8+NN12+NN2)+((H134+H148+H132+H150)/2+H133-2*NN13-(H167+H164+H165)+2*(NN12+NN2))/3
125	126	CUGCGG	rna.tloop.dg	2.96744	0.410676	0.5	4.65584e-05	0.000108764	7.76612e-05	225	H166-(NN8+NN12+NN2)+((H134+H148+H132+H150)/2+H133-2*NN13-(H167+H164+H165)+2*(NN12+NN2))/3
126	127	CAACGG	rna.tloop.dg	5.61821	0.420899	0.5	1.67241e-05	1.89797e-05	1.78519e-05	269	H170-(NN8+NN12+NN2)+((H134+H148+H132+H150)/2+H133-2*NN13-(H167+H164+H165)+2*(NN12+NN2))/3
127	128	ACAGUGCU	rna.hexaloop.dg	3.096	0.292038	0.5	3.15693e-09	3.53523e-08	1.92546e-08	289	(H136+H138-(2*NN90+3*NN12+NN1+NN3+NN8))/2
128	129	ACAGUGAU	rna.hexaloop.dg	3.71255	0.414102	0.5	6.86902e-10	5.28262e-09	2.98476e-09	290	H139-(NN90+NN8+NN12)
129	130	ACAGUGUU	rna.hexaloop.dg	1.83773	0.355748	0.5	4.2539e-08	4.37916e-07	2.40228e-07	288	H135-(NN90+2*NN12+NN1+NN3)
130	131	ACAGUACU	rna.hexaloop.dg	2.91893	0.42235	0.5	0	0	0	291	H137-(NN90+2*NN12+NN1+NN3)
131	132	Mismatch-Basepair Stack	rna.coaxstack.dg	-2.20422	0.127991	0.5	0.014552	0.0233896	0.0189708	25	(X1+X2+X3+X4+X5+X6+X7+X8+X9+X10+X11+X12+X13+X14+X15+X16-2*T12+(D44-T33)/2+X17+X18+NN32+NN34+2*D45+5*NN30-18*NN95-18*NN8-18*NN12-16*NN2-8*NN59-2*NN3-2*NN31-2*NN45+2*NN27+2*NN41+NN57)/18
132	133	AUC UUG	rna.int11.dg	0.769925	0.297587	0.5	0.000480836	0.00146975	0.000975293	133	(I14-R125+I15-R129+2*NN2)/2
133	134	CAC GAG	rna.int11.dg	0.712061	0.386127	0.5	0.000479735	0.000997975	0.000738855	150	(I6-R109+I27-R95+2*NN8)/2
134	135	CAC GCG	rna.int11.dg	-0.448921	0.421024	0.5	0.000546204	0.00147767	0.00101194	130	I1-R109+NN8
135	136	CCC GAG	rna.int11.dg	0.232299	0.39748	0.5	0.000652505	0.00129945	0.000975978	132	I5-R109+NN8
136	137	CCC GCG	rna.int11.dg	0.436624	0.395159	0.5	0.000243463	0.000656582	0.000450022	172	I7-R109+NN8
137	138	CCC GUG	rna.int11.dg	0.436799	0.420785	0.5	0.000261662	0.00062762	0.000444641	174	I8-R109+NN8
138	139	CGC GAG	rna.int11.dg	-0.130686	0.421021	0.5	0.000675465	0.00163925	0.00115736	125	I2-R109+NN8
139	140	CUC GCG	rna.int11.dg	-0.0301209	0.419249	0.5	0.000283123	0.000760888	0.000522006	167	I3-R109+NN8
140	141	CUC GUG	rna.int11.dg	-0.119503	0.385226	0.5	0.00048852	0.00121819	0.000853355	139	(I4-R109+I11-R157+2*NN8)/2
141	142	CAG GAC	rna.int11.dg	0.90898	0.393409	0.5	0.000297225	0.000654051	0.000475638	170	(I19-R22+I21-R72+2*NN9)/2
142	143	CGG GGC	rna.int11.dg	-1.40588	0.517446	0.5	0.000415384	0.000813141	0.000614262	156	I26-R22+NN9
143	144	CUG GUC	rna.int11.dg	0.417986	0.415824	0.5	0.000378499	0.0012085	0.000793499	143	(I12-R122+I13-R22+2*NN9)/2
144	145	CAG GAU	rna.int11.dg	1.86429	0.563425	0.5	0.000171884	0.00037981	0.000275847	183	I40-(NN95+2*NN12+2*NN3+NN15)
145	146	CAG GCU	rna.int11.dg	1.01993	0.530307	0.5	0.00027148	0.000656652	0.000464066	171	I39-(NN95+2*NN12+2*NN3+NN15)
146	147	CAG GGU	rna.int11.dg	0.927448	0.524562	0.5	0.000367328	0.000691276	0.000529302	166	I36-(NN95+2*NN12+2*NN3+NN15)
147	148	CCG GCU	rna.int11.dg	1.45996	0.555676	0.5	6.254e-05	0.00024563	0.000154085	200	I38-(NN95+2*NN12+2*NN3+NN15)
148	149	CGG GAU	rna.int11.dg	0.904323	0.540952	0.5	9.5147e-05	0.000418069	0.000256608	185	I35-(NN95+2*NN12+2*NN3+NN15)
149	150	CUG GUU	rna.int11.dg	0.774808	0.553775	0.5	0.00112592	0.00170738	0.00141665	122	I37-(NN95+2*NN12+2*NN3+NN15)
150	151	CAU GAG	rna.int11.dg	0.654703	0.519752	0.5	0.000125056	0.000381399	0.000253227	187	I45-(NN95+2*NN12+2*NN3+NN14)
151	152	CAU GCG	rna.int11.dg	0.565398	0.568816	0.5	3.95456e-05	0.000220882	0.000130214	205	I44-(NN95+2*NN12+2*NN3+NN14)
152	153	CGU GAG	rna.int11.dg	-0.163162	0.528183	0.5	0.000265353	0.000794176	0.000529765	165	I41-(NN95+2*NN12+2*NN3+NN14)
153	154	CUU GCG	rna.int11.dg	0.996978	0.580942	0.5	4.86224e-05	0.000187816	0.000118219	208	I43-(NN95+2*NN12+2*NN3+NN14)
154	155	CUU GUG	rna.int11.dg	1.18626	0.594334	0.5	9.19321e-05	0.000336542	0.000214237	192	I42-(NN95+2*NN12+2*NN3+NN14)
155	156	GAC CAG	rna.int11.dg	0.749716	0.671575	0.5	0.000203296	0.00064423	0.000423763	175	I20-R123+NN13
156	157	GGC CGG	rna.int11.dg	-2.42137	0.216123	0.5	0.000332602	0.000794511	0.000563556	162	(I22-R150+I23-R148+I24-R151+I25-R158+4*NN13)/4
157	158	GUC CUG	rna.int11.dg	-0.701506	0.444771	0.5	0.000356188	0.000835737	0.000595962	160	(I9-R123+I10-R158+2*NN13)/2
158	159	GAG CAU	rna.int11.dg	1.49219	0.531426	0.5	9.41123e-05	0.000328318	0.000211215	193	I30-(NN95+2*NN12+2*NN3+NN11)
159	160	GAG CGU	rna.int11.dg	0.940681	0.539845	0.5	0.000127059	0.000314757	0.000220908	190	I28-(NN95+2*NN12+2*NN3+NN11)
160	161	GUG CUU	rna.int11.dg	0.501756	0.593668	0.5	0.00022538	0.000668791	0.000447085	173	I29-(NN95+2*NN12+2*NN3+NN11)
161	162	GAU CAG	rna.int11.dg	1.63887	0.564162	0.5	7.97331e-05	0.000256423	0.000168078	198	I34-(NN95+2*NN12+2*NN3+NN10)
162	163	GAU CGG	rna.int11.dg	1.3212	0.554362	0.5	4.133e-05	0.000213612	0.000127471	207	I32-(NN95+2*NN12+2*NN3+NN10)
163	164	GGU CAG	rna.int11.dg	1.02533	0.57202	0.5	3.26443e-05	0.000187698	0.000110171	213	I31-(NN95+2*NN12+2*NN3+NN10)
164	165	GUU CUG	rna.int11.dg	1.30653	0.607446	0.5	7.85966e-05	0.000356392	0.000217494	191	I33-(NN95+2*NN12+2*NN3+NN10)
165	166	UUA AUU	rna.int11.dg	1.80228	0.368554	0.5	0.000105465	0.000512091	0.000308778	182	I18-R126+NN19
166	167	CAC GAAG	rna.int21.dg	2.41804	0.438512	0.5	4.05606e-05	0.000267573	0.000154067	201	(I46+I47-2*R95+2*NN8)/2
167	168	CAC GGAG	rna.int21.dg	1.01905	0.644427	0.5	2.87296e-05	0.000124891	7.68103e-05	226	I52-R95+NN8
168	169	CCC GAAG	rna.int21.dg	2.23389	0.621099	0.5	4.17174e-05	0.000162983	0.00010235	216	I54-R95+NN8
169	170	CGC GAAG	rna.int21.dg	1.68295	0.62522	0.5	8.04429e-05	0.00029289	0.000186666	196	I58-R95+NN8
170	171	CGC GGAG	rna.int21.dg	0.706803	0.638798	0.5	0.000121468	0.000349803	0.000235635	188	I60-R95+NN8
171	172	CAC GCCG	rna.int21.dg	1.60726	0.626179	0.5	1.11114e-05	6.24319e-05	3.67716e-05	250	I51-R95+NN8
172	173	CCC GCCG	rna.int21.dg	2.40527	0.618089	0.5	1.01461e-05	4.68423e-05	2.84942e-05	258	I56-R95+NN8
173	174	CUC GCCG	rna.int21.dg	2.1773	0.620281	0.5	2.06683e-05	4.67384e-05	3.37033e-05	255	I61-R95+NN8
174	175	CUC GUCG	rna.int21.dg	1.48667	0.629925	0.5	3.85912e-05	7.17573e-05	5.51743e-05	236	I63-R95+NN8
175	176	CAC GAGG	rna.int21.dg	0.712426	0.642102	0.5	7.58118e-05	0.000122907	9.93594e-05	218	I49-R95+NN8
176	177	CGC GAGG	rna.int21.dg	1.10511	0.631579	0.5	2.42984e-05	0.000127685	7.59917e-05	227	I59-R95+NN8
177	178	CCC GAUG	rna.int21.dg	2.42443	0.617406	0.5	9.91319e-06	4.8135e-05	2.90241e-05	257	I55-R95+NN8
178	179	CCC GCUG	rna.int21.dg	1.87256	0.622825	0.5	9.78124e-06	5.98947e-05	3.4838e-05	253	I57-R95+NN8
179	180	CUC GCUG	rna.int21.dg	0.572103	0.440167	0.5	0.000115265	0.000293381	0.000204323	194	(I62-R163+I295-R95+2*NN8)/2
180	181	CUC GUUG	rna.int21.dg	1.32789	0.557402	0.5	0.000123193	0.000234468	0.000178831	197	(I64-R95+I65-R161+2*NN8)/2
181	182	GAG CAAC	rna.int21.dg	2.43129	0.6174	0.5	8.33199e-05	0.000241935	0.000162627	199	I48-R95+NN8
182	183	GAG CGAC	rna.int21.dg	2.05318	0.621089	0.5	9.95387e-05	0.000297551	0.000198545	195	I53-R95+NN8
183	184	GAG CAGC	rna.int21.dg	0.689988	0.443406	0.5	0.000291939	0.000935217	0.000613578	157	(I50-R163+I296-R95+2*NN8)/2
184	185	GAG CGGC	rna.int21.dg	0.392525	0.669698	0.5	5.8135e-05	0.000141633	9.9884e-05	217	I297-R95+NN8
185	186	CAAC GAAG	rna.int22.dg	1.23384	0.378863	0.5	3.68604e-05	0.000154711	9.57857e-05	219	(I100-R95+I129-R109+2*NN8)/2
186	187	CAAC GAGG	rna.int22.dg	-0.363591	0.465576	0.5	1.91989e-05	6.0962e-05	4.00805e-05	249	I126-R109+NN8
187	188	CAGC GAAG	rna.int22.dg	0.288484	0.450505	0.5	2.24772e-05	7.53457e-05	4.89114e-05	240	I127-R109+NN8
188	189	CAGC GAGG	rna.int22.dg	-0.258151	0.388648	0.5	1.96133e-05	6.29918e-05	4.13025e-05	248	I141-R128+NN8
189	190	CAUC GAUG	rna.int22.dg	1.41254	0.518428	0.5	4.86844e-06	3.96708e-05	2.22696e-05	263	I128-R109+NN8
190	191	CAAC GCAG	rna.int22.dg	0.602219	0.401593	0.5	1.86353e-05	3.59414e-05	2.72884e-05	259	I125-R109+NN8
191	192	CAAC GCGG	rna.int22.dg	0.0418641	0.46038	0.5	1.03911e-05	4.13056e-05	2.58483e-05	261	I121-R109+NN8
192	193	CACC GCAG	rna.int22.dg	1.04093	0.48138	0.5	2.18251e-05	3.24223e-05	2.71237e-05	260	I124-R109+NN8
193	194	CAGC GCGG	rna.int22.dg	-0.384436	0.404589	0.5	4.04033e-05	9.28849e-05	6.66441e-05	233	I139-R109+NN8
194	195	CAUC GCUG	rna.int22.dg	-0.0517259	0.400786	0.5	1.11446e-06	1.05327e-05	5.82358e-06	284	I123-R109+NN8
195	196	CAAC GGAG	rna.int22.dg	-0.0434659	0.415795	0.5	4.28828e-05	0.000106016	7.44494e-05	229	I106-R109+NN8
196	197	CAAC GGCG	rna.int22.dg	-0.803041	0.426739	0.5	1.30697e-05	3.66378e-05	2.48537e-05	262	I104-R109+NN8
197	198	CACC GGAG	rna.int22.dg	-1.00567	0.443545	0.5	5.58428e-05	7.66464e-05	6.62446e-05	234	I105-R109+NN8
198	199	CACC GGCG	rna.int22.dg	-0.730101	0.459137	0.5	2.45681e-05	6.75943e-05	4.60812e-05	242	I148-R109+NN8
199	200	CAGC GGAG	rna.int22.dg	-0.731641	0.479431	0.5	5.03768e-05	8.37074e-05	6.70421e-05	232	I102-R109+NN8
200	201	CAUC GGUG	rna.int22.dg	0.812174	0.43972	0.5	5.17078e-06	3.11887e-05	1.81797e-05	268	I103-R109+NN8
201	202	CCGC GAAG	rna.int22.dg	0.693374	0.452481	0.5	1.58356e-05	7.1965e-05	4.39003e-05	244	I112-R109+NN8
202	203	CCUC GAUG	rna.int22.dg	-0.225231	0.407837	0.5	3.32146e-05	0.000107019	7.01168e-05	231	I113-R109+NN8
203	204	CCAC GCAG	rna.int22.dg	2.15108	0.564499	0.5	2.1971e-06	1.55961e-05	8.8966e-06	280	I120-R109+NN8
204	205	CCAC GCGG	rna.int22.dg	0.720259	0.423785	0.5	1.47298e-05	1.02284e-05	1.24791e-05	273	I116-R109+NN8
205	206	CCCC GCAG	rna.int22.dg	1.84638	0.503571	0.5	1.50964e-06	1.36468e-05	7.57822e-06	282	I119-R109+NN8
206	207	CCGC GCAG	rna.int22.dg	0.655599	0.414354	0.5	2.20893e-06	1.28383e-05	7.52362e-06	283	I117-R109+NN8
207	208	CCUC GCUG	rna.int22.dg	-0.123926	0.455917	0.5	2.96925e-05	0.000117079	7.33858e-05	230	I118-R109+NN8
208	209	CCCC GUUG	rna.int22.dg	1.64432	0.469434	0.5	2.80677e-06	1.97027e-05	1.12547e-05	276	I147-R109+NN8
209	210	CCGC GUGG	rna.int22.dg	0.167074	0.399267	0.5	3.92634e-06	6.16007e-06	5.0432e-06	285	I143-R109+NN8
210	211	CCUC GUUG	rna.int22.dg	0.0809641	0.448425	0.5	2.29561e-05	8.34319e-05	5.3194e-05	238	I114-R109+NN8
211	212	CGAC GAAG	rna.int22.dg	-0.202496	0.4444	0.5	4.04089e-05	6.90544e-05	5.47316e-05	237	I101-R109+NN8
212	213	CGAC GACG	rna.int22.dg	-0.418646	0.405697	0.5	1.61302e-05	7.33426e-05	4.47364e-05	243	I149-R109+NN8
213	214	CGAC GAGG	rna.int22.dg	-1.72112	0.474169	0.5	6.7696e-05	0.000117762	9.2729e-05	220	I96-R109+NN8
214	215	CGCC GAAG	rna.int22.dg	0.572509	0.448776	0.5	0.000101185	0.000125241	0.000113213	211	I99-R109+NN8
215	216	CGGC GAAG	rna.int22.dg	-0.552311	0.447037	0.5	6.72132e-05	0.000158041	0.000112627	212	I97-R109+NN8
216	217	CGGC GAGG	rna.int22.dg	-0.259636	0.408304	0.5	6.21692e-06	2.0118e-05	1.31675e-05	272	I138-R166+NN8
217	218	CGUC GAUG	rna.int22.dg	0.925889	0.49262	0.5	1.99207e-05	5.28921e-05	3.64064e-05	251	I98-R109+NN8
218	219	CGAC GGAG	rna.int22.dg	-0.119246	0.376485	0.5	4.85407e-05	0.000187845	0.000118193	209	I142-R128+NN8
219	220	CGAC GGCG	rna.int22.dg	-0.512256	0.406728	0.5	1.55832e-05	5.65695e-05	3.60764e-05	252	I136-R109+NN8
220	221	CGCC GGUG	rna.int22.dg	0.202219	0.39889	0.5	3.59894e-06	1.46548e-05	9.12687e-06	278	I144-R109+NN8
221	222	CGGC GGAG	rna.int22.dg	-0.368091	0.384735	0.5	1.01476e-05	5.80087e-05	3.40781e-05	254	I140-R166+NN8
222	223	CGUC GGUG	rna.int22.dg	1.321	0.543576	0.5	1.68681e-06	1.62684e-05	8.97761e-06	279	I146-R109+NN8
223	224	CUGC GCAG	rna.int22.dg	0.499569	0.498474	0.5	3.12684e-05	5.3678e-05	4.24732e-05	246	I115-R109+NN8
224	225	CUGC GCGG	rna.int22.dg	-0.701753	0.291218	0.5	9.00101e-05	0.000120321	0.000105166	215	(I134-R128+I137-R109+2*NN8)/2
225	226	CUAC GUAG	rna.int22.dg	1.33171	0.538015	0.5	4.54942e-06	1.92719e-05	1.19107e-05	275	I111-R109+NN8
226	227	CUAC GUGG	rna.int22.dg	0.411414	0.471884	0.5	8.16209e-06	3.41563e-05	2.11592e-05	264	I107-R109+NN8
227	228	CUCC GUAG	rna.int22.dg	0.228909	0.401663	0.5	1.56929e-05	4.668e-05	3.11865e-05	256	I110-R109+NN8
228	229	CUGC GUAG	rna.int22.dg	1.30878	0.516167	0.5	9.0838e-06	2.9389e-05	1.92364e-05	267	I108-R109+NN8
229	230	CUGC GUGG	rna.int22.dg	0.626279	0.40235	0.5	2.75041e-06	2.62979e-05	1.45242e-05	270	I145-R109+NN8
230	231	CUUC GUUG	rna.int22.dg	-0.693106	0.473668	0.5	4.03954e-05	0.000108726	7.45607e-05	228	I109-R109+NN8
231	232	CAAU GAAG	rna.int22.dg	2.6269	0.58483	0.5	4.10883e-07	3.91574e-06	2.16331e-06	286	I305-(NN95+2*NN12+NN3+NN13+NN10+NN2)
232	233	GAAG CAAU	rna.int22.dg	1.7126	0.624166	0.5	5.50049e-06	3.37689e-05	1.96347e-05	266	I302-(NN95+2*NN12+NN3+NN15+NN9+NN2)
233	234	GAAG UAAU	rna.int22.dg	3.34191	1.25425	0.5	0.000438454	0.0010804	0.000759427	145	I308-(NN95+2*NN12+NN3+NN15+NN10+NN2)
234	235	GAAG UAGU	rna.int22.dg	1.84359	1.2694	0.5	5.22315e-06	1.01841e-05	7.70363e-06	281	I303-(NN95+2*NN12+NN3+NN15+NN10+NN2)
235	236	GAAG UGAU	rna.int22.dg	3.37669	1.25345	0.5	2.98634e-07	3.05048e-06	1.67456e-06	287	I307-(NN95+2*NN12+NN3+NN15+NN10+NN2)
236	237	GGAG UAGU	rna.int22.dg	-0.193337	1.26701	0.5	5.276e-06	2.14327e-05	1.33543e-05	271	I301-(NN95+NN3+NN7+NN15+NN10+NN12+NN2)
237	238	GA or UU First mismatch	implicit in rna.tstackh.dg	-0.946562	0.153623	0.5	0.0213752	0.0257461	0.0235607	15	Hairpin Regression
238	239	GG First mismatch	implicit in rna.tstackh.dg	-0.698916	0.296063	0.5	0.00591698	0.0117823	0.00884964	60	Hairpin Regression
239	240	AU/GU Closure	implicit in rna.ststacki.dg, rna.tstacki1n.dg, rna.tstacki23.dg, rna.int11.dg, and rna.int21.dg	0.764834	0.0568834	0.5	0.0254647	0.0657577	0.0456112	6	Internal Loop Regression 1
240	241	XY/AG Closure	implicit in rna.tstacki.dg	-0.611037	0.0928144	0.5	0.00556263	0.0141581	0.00986036	51	Internal Loop Regression 1
241	242	XY/GA Closure	implicit in rna.tstacki.dg	-0.964813	0.0790473	0.5	0.00909637	0.0190873	0.0140918	37	Internal Loop Regression 1
242	243	XY/GG Closure	implicit in rna.tstacki.dg	-0.563372	0.133888	0.5	0.00275692	0.00838407	0.00557049	74	Internal Loop Regression 1
243	244	XY/UU Closure	implicit in rna.tstacki.dg	-0.490912	0.0907358	0.5	0.00526655	0.0142189	0.00974273	55	Internal Loop Regression 1
244	245	YR/AG Closure (2x3)	implicit rna.tstacki23.dg	-0.320921	0.203401	0.5	0.000411321	0.00173944	0.00107538	129	Internal Loop Regression 2
245	246	RY/GA Closure (2x3)	implicit rna.tstacki23.dg	-1.25932	0.156661	0.5	0.00100424	0.00425224	0.00262824	103	Internal Loop Regression 2
246	247	YR/GA Closure (2x3)	implicit rna.tstacki23.dg	-1.01383	0.102559	0.5	0.00110088	0.00473586	0.00291837	96	Internal Loop Regression 2
247	248	XY/GG Closure (2x3)	implicit rna.tstacki23.dg	-0.695128	0.245571	0.5	0.000799863	0.00324313	0.0020215	113	Internal Loop Regression 2
248	249	XY/UU Closure (2x3)	implicit rna.tstacki23.dg	-0.322143	0.131263	0.5	0.00115981	0.00474278	0.0029513	95	Internal Loop Regression 2
249	250	delta_G_init(1x1)	implicit in rna.int11.dg	0.323802	0.120474	0.5	0.0146811	0.0304759	0.0225785	18	Internal Loop Regression 1
250	251	delta_G_GG (1x1)	implicit in rna.int11.dg	-2.54208	0.30802	0.5	0.00609864	0.0115046	0.00880162	62	Internal Loop Regression 1
251	252	delta_G_RU/YU (1x1)	implicit in rna.int11.dg	-0.277758	0.13606	0.5	0.00018878	0.000589374	0.000389077	178	Internal Loop Regression 1
252	253	delta_G_init (1x2)	implicit in rna.int21.dg	2.2209	0.125149	0.5	0.00690903	0.0195618	0.0132354	41	Internal Loop Regression 3
253	254	delta_G_GG/GA	implicit in rna.int21.dg	-1.02474	0.189208	0.5	0.00403235	0.0115294	0.00778087	65	Internal Loop Regression 3
254	255	delta_G_UU	implicit in rna.int21.dg	-0.781063	0.225616	0.5	0.00160878	0.0058713	0.00374004	92	Internal Loop Regression 3
255	256	delta_p (2x2)	implicit in rna.int22.dg	0.565264	0.299158	0.5	0.000823015	0.00234898	0.001586	119	(12*I128-72*R109-2*I82+30*R22-2*I150-2*I283+4*D19-36*NN9-6*I67+28*R21-35*NN13+12*I117-12*I80-12*I66+12*I116-2*I288+2*R39-2*I289+R96+R99-2*I290+R158+12*I115-6*I79+12*I148-2*I73+2*R72-2*I74-2*I284-1.5*I69+1.5*R38-1.5*I70+1.5*R15-3*I71+12*I111+72*NN8-6*I75-6*I72)/72
256	257	delta_GG (2x2)	implicit in rna.int22.dg	-1.29285	0.158095	0.5	0.00163014	0.00413898	0.00288456	97	(12*I142-30*R128+84*NN8-42*I76+21*R70+21*R73-64*NN9-6*I72+9*R21-18*NN13+12*I136-52*R109-6*I68+7.5*R15+12*I144-1.5*I69+1.5*R38-1.5*I70-3*I71+12*I139-6*I81+6*R72+12*I143-6*I78+16*R22+6*I134+6*I137-6*I79+12*I141-2*I82-2*I150-2*I283+2*D19)/84
257	258	GGAC CAGG	rna.int22.dg	-2.68656	0.223378	0.5	0.000870328	0.00155592	0.00121312	124	(I288-R39+I289-(R96+R99)/2+I290-(R21+R158)/2+3*NN13)/3
258	259	GAGC CGAG	rna.int22.dg	-1.36542	0.565973	0.5	0.000747509	0.00117487	0.00096119	135	I66-R21+NN13
259	260	GUUC CUUG	rna.int22.dg	-0.565199	0.549227	0.5	0.000522015	0.000955416	0.000738715	151	I67-R21+NN13
260	261	GCAC CACG	rna.int22.dg	0.904026	0.585569	0.5	0.00040109	0.000904567	0.000652828	153	I68-R15+NN13
261	262	GCUC CUCG	rna.int22.dg	1.05158	0.501857	0.5	0.000607093	0.000908185	0.000757639	146	(I69-R38+I70-R15+2*NN13)/2
262	263	GACC CCAG	rna.int22.dg	0.861686	0.542458	0.5	0.00153496	0.00199007	0.00176252	116	I71-R21+NN13
263	264	GAAC CAAG	rna.int22.dg	1.43143	0.531174	0.5	0.000404065	0.000729376	0.000566721	161	I72-R21+NN13
264	265	CGAG GAGC	rna.int22.dg	-1.21827	0.202155	0.5	0.000742875	0.00123848	0.000990677	131	(I95-R72+I282-D19+I285-R20+I286-D15+I287-D22+5*NN9)/5
265	266	CAGG GGAC	rna.int22.dg	-0.807351	0.313928	0.5	0.000478775	0.000862091	0.000670433	152	(I73-R72+I74-R22+I284-D19+3*NN9)/3
266	267	CUUG GUUC	rna.int22.dg	-0.441587	0.501425	0.5	0.000657501	0.00112124	0.00088937	137	I75-R22+NN9
267	268	CGGG GGGC	rna.int22.dg	0.809251	0.451598	0.5	0.000565517	0.000962106	0.000763812	144	I76-(R70+R73)/2+NN9
268	269	CCAG GACC	rna.int22.dg	1.04789	0.493124	0.5	0.0007969	0.00148561	0.00114126	126	I77-R22+NN9
269	270	CCUG GUCC	rna.int22.dg	1.29208	0.482862	0.5	0.000270688	0.000510458	0.000390573	177	I78-R22+NN9
270	271	CUCG GCUC	rna.int22.dg	1.35617	0.481262	0.5	0.00026783	0.000452185	0.000360008	179	I79-R22+NN9
271	272	CCCG GCCC	rna.int22.dg	1.61181	0.47953	0.5	0.00015715	0.000300232	0.000228691	189	I80-R22+NN9
272	273	CACG GCAC	rna.int22.dg	2.02196	0.602773	0.5	0.000379894	0.000735269	0.000557581	163	I81-R72+NN9
273	274	CAAG GAAC	rna.int22.dg	1.25969	0.266162	0.5	0.00143857	0.00157874	0.00150865	120	(I82-R22+I150-R22+I283-D19+3*NN9)/3
274	275	UGAA AAGU	rna.int22.dg	0.727056	0.404698	0.5	0.000435731	0.000763116	0.000599424	158	I83-R36+NN19
275	276	UAGA AGAU	rna.int22.dg	0.906315	0.467919	0.5	0.000454932	0.000831668	0.0006433	154	I131-R100+NN19
276	277	UUUA AUUU	rna.int22.dg	1.10727	0.371973	0.5	0.000423285	0.000774686	0.000598985	159	I84-R36+NN19
277	278	UGGA AGGU	rna.int22.dg	2.35033	0.366681	0.5	0.000316912	0.000490608	0.00040376	176	I133-R36+NN19
278	279	UCAA AACU	rna.int22.dg	1.89601	0.29794	0.5	0.000593536	0.00126453	0.000929033	136	I85-R100+NN19
279	280	UCUA AUCU	rna.int22.dg	2.17495	0.33691	0.5	0.000185408	0.000324463	0.000254935	186	I86-R100+NN19
280	281	UUCA ACUU	rna.int22.dg	2.82327	0.325734	0.5	0.000709422	0.000878025	0.000793724	142	I87-R100+NN19
281	282	UAAA AAAU	rna.int22.dg	2.78173	0.314444	0.5	0.000573999	0.000936895	0.000755447	147	I88-R36+NN19
282	283	AGAU UAGA	rna.int22.dg	0.254547	0.261541	0.5	0.000474144	0.000788162	0.000631153	155	(I89-R93+I90-R44+2*NN5)/2
283	284	AAGU UGAA	rna.int22.dg	1.68526	0.395422	0.5	0.000362339	0.000598913	0.000480626	169	I130-R93+NN5
284	285	AUUU UUUA	rna.int22.dg	0.595414	0.391365	0.5	0.000554595	0.000944265	0.00074943	149	I91-R44+NN5
285	286	AGGU UGGA	rna.int22.dg	1.77757	0.365959	0.5	0.000425763	0.000645787	0.000535775	164	I132-R44+NN5
286	287	ACAU UACA	rna.int22.dg	2.31686	0.310422	0.5	0.000947232	0.00131154	0.00112939	127	I92-R93+NN5
287	288	AACU UCAA	rna.int22.dg	2.43077	0.310807	0.5	0.00130345	0.00192504	0.00161425	118	I93-R93+NN5
288	289	AAAU UAAA	rna.int22.dg	2.68604	0.295358	0.5	0.000602642	0.000987359	0.000795	141	I94-R44+NN5
289	290	UGAG GAGU	rna.int22.dg	-0.158446	0.508288	0.5	0.000333979	0.000652508	0.000493243	168	I291-R28+NN21
290	291	UAGG GGAU	rna.int22.dg	2.79601	0.962543	0.5	0.000650347	0.00100604	0.000828194	140	I306-(Sym+NN95+2*NN3+2*NN7+2*NN15)
291	292	UAAG GAAU	rna.int22.dg	1.83169	0.48807	0.5	0.00122091	0.00161533	0.00141812	121	I293-R28+NN21
292	293	GGAU UAGG	rna.int22.dg	1.88293	0.54966	0.5	9.13456e-05	0.000171882	0.000131614	204	I292-R97+NN18
293	294	GAGU UGAG	rna.int22.dg	2.66999	0.561244	0.5	0.000239391	0.000384737	0.000312064	181	I304-R97+NN18
